# Supplementary material for: Catalyst-free synthesis of novel 1,5-benzodiazepines and 3,4-dihydroquinoxalines using isocyanide-based one-pot, three- and four-component reactions
Source: PubMed Central journal article supplement — RSC Adv. 2021 Jul 13;11(39):24466–73. doi: 10.1039/d1ra04444c (PMC9036818; doi:10.1039/d1ra04444c), 2021-07-13
Supplement: RA-011-D1RA04444C-s001.pdf [file RA-011-D1RA04444C-s001.pdf]

# Catalyst-free synthesis of novel 1,5-benzodiazepines and 3,4-dihydroquinoxalines using isocyanide-based one-pot, three- and four-component reactions

Reagan L. Mohlala<sup>a,b</sup>; E. Mabel Coyanis<sup>a\*</sup>; Manuel A. Fernandes<sup>b</sup>; Moira L. Bode<sup>b\*</sup>

<sup>a</sup> Advanced Materials Division, Mintek, Private Bag X3015, Randburg, 2125, South Africa

<sup>b</sup> Molecular Sciences Institute, University of the Witwatersrand, PO Wits, 2050, South Africa

Corresponding authors: mabelc@mintek.co.za (EM. Coyanis); Moira.Bode@wits.ac.za (M.L Bode)

## Table of contents

|                                                                                                                                                                                                                                  |    |
|----------------------------------------------------------------------------------------------------------------------------------------------------------------------------------------------------------------------------------|----|
| General procedure for the synthesis of 1H-Benzo[d]imidazol-2(3H)-one derivatives (6a-h) .....                                                                                                                                    | 1  |
| General procedure for the synthesis of 2-methyl-N-(2,2,4-trimethyl-2,3,4,5-tetrahydro-1,4-methanobenzo[b][1,4]diazepin-10-ylidene)propan-2-amine derivatives (10a-f) .....                                                       | 3  |
| General method for the synthesis of N-,3,3-Dimethyl-3,4-dihydroquinoxalin-2(1H)-ylidene)-2-methylpropan-2-amine derivatives (11a-h) .....                                                                                        | 5  |
| General procedure for the synthesis of 2-methyl-N-(2,2,4-trimethyl-2,3,4,5-tetrahydro-1,4-methanobenzo[b][1,4]diazepin-10-ylidene)propan-2-amine derivatives using Acetone-d <sub>6</sub> (10g-h) (Green-deuterated-atoms) ..... | 8  |
| General method for the synthesis of N-,3,3-Dimethyl-3,4-dihydroquinoxalin-2(1H)-ylidene)-2-methylpropan-2-amine derivatives using Acetone-d <sub>6</sub> (11j-k) (Green-deuterated-atoms) .....                                  | 9  |
| General method for the synthesis of 4-oxo-4,5-dihydro-benzodiazepine-2-carboxylates (12a-j) .....                                                                                                                                | 12 |
| X-ray crystallographic data of compounds 10a, 10e, 11f and 11g .....                                                                                                                                                             | 15 |
| NMR, HRMS and FTIR spectra .....                                                                                                                                                                                                 | 17 |

## General procedure for the synthesis of 1H-Benzo[d]imidazol-2(3H)-one derivatives (6a-h)

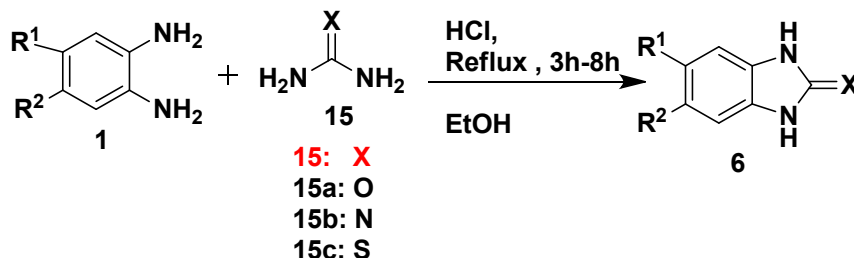

The synthesis was done following the earlier method reported by Kadhim.<sup>1</sup> In a round-bottomed flask equipped with a magnetic stirrer bar, either urea (**15a**), thiourea (**15b**) or guanidine hydrochloride (**15c**) were reacted with a phenylenediamine derivative (**1**) and concentrated hydrochloric acid (HCl) in ethanol by refluxing for 8 h with TLC monitoring. The reaction was then allowed to cool to room temperature; forming a precipitate which was filtered and washed with isopropanol to obtain the solid product.

### 1H-Benzo[d]imidazol-2(3H)-one (6a)

Urea (2.81 g, 46 mmol), *o*-phenylenediamine (**1a**) ( 5.01g, 46 mmol) and HCl (1.68 g, 46 mmol) were reacted to form 1H-benzo[d]imidazol-2(3H)-one (**6a**): **Physical characteristics**: yellow solid; Yield: 5.21 g, 84 %; **Mp**: 274-276 °C (lit.<sup>1</sup> 275-279 °C); **<sup>1</sup>H NMR** (400 MHz, DMSO-*d*<sub>6</sub>) δ 6.69-6.67 (2H, m, Ar-H), 6.57-6.55 (2H, m, Ar-H), 5.44 (2H, br s, N-H); **<sup>13</sup>C NMR** (101 MHz, DMSO-*d*<sub>6</sub>) δ 159.7 (C=O), 132.9 (Ar-C), 119.3(Ar-CH), 116.8 (Ar-CH).

### 5,6-Dimethyl-1H-benzo[d]imidazol-2(3H)-one (6b)

Urea (0.88 g, 14.7 mmol), 4,5-dimethyl-1,2-phenylenediamine (**1b**) (2.01 g, 14.7 mmol) and HCl (0.53 g, 14.7 mmol) were reacted to form 5,6-dimethyl-1*H*-benzo[*d*]imidazol-2(3*H*)-one (**6b**): **Physical characteristics**: brown solid; Yield: 1.81 g, 76%; **Mp**: 394-396 °C, (lit.<sup>2</sup> 395 °C); **<sup>1</sup>H NMR** (400 MHz, DMSO-*d*<sub>6</sub>) δ 6.46 (2H, s, Ar-H), 5.49 (2H, br s, N-H); 2.01 (6H, s, 2 x CH<sub>3</sub>); **<sup>13</sup>C NMR** (101 MHz, DMSO-*d*<sub>6</sub>) δ 159.9 (C=O), 130.8 (Ar-C), 126.4 (Ar-C) 118.4 (Ar-CH), 18.69 (2 x CH<sub>3</sub>).

#### 5,6-Dichloro-1*H*-benzo[*d*]imidazol-2(3*H*)-one (**6c**)

Urea (0.68 g, 11.3 mmol), 4,5-dichloro-*o*-phenylenediamine (**1c**) (5.01g, 11.3 mmol) and HCl (1.68 g, 11.3 mmol) were reacted to form 5,6-dichloro-1*H*-benzo[*d*]imidazol-2(3*H*)-one (**6c**): **Physical characteristics**: black solid; Yield: 1.6 g, 70 %; **Mp**: 397-399°C (lit.<sup>3</sup>398 °C); **<sup>1</sup>H NMR** (400 MHz, DMSO-*d*<sub>6</sub>) δ 6.85 (2H, s, Ar-H), 5.49 (2H, br s, N-H); **<sup>13</sup>C NMR** (101 MHz, DMSO-*d*<sub>6</sub>) δ 159.9 (C=O), 133.4 (Ar-C), 119.8 (Ar-C), 117.0 (Ar-CH).

#### Methyl 2-oxo-2,3-dihydro-1*H*-benzo[*d*]imidazole-5-carboxylate (**6d**)

Urea (1.81 g, 30.09 mmol), methyl 3,4-diaminobenzoate (**1d**) (5.01g, 30.09 mmol) and HCl (1.09g, 30.09 mmol) were reacted to form methyl 2-oxo-2,3-dihydro-1*H*-benzo[*d*]imidazole-5-carboxylate: **Physical characteristics**: brown solid; Yield: 4.61 g, 80 %; **Mp**: 311-313 °C (lit.<sup>4</sup> 312-313 °C); **<sup>1</sup>H NMR** (400 MHz, DMSO-*d*<sub>6</sub>) δ 7.57 (1H, s, Ar-H), 7.45 (1H, d, *J*= 8.4 Hz, Ar-H), 6.74 (1H, d, *J*= 8.4 Hz, Ar-H), 5.54 (2H, br s, N-H), 3.75 (3H, s, O-CH<sub>3</sub>); **<sup>13</sup>C NMR** (101 MHz, DMSO-*d*<sub>6</sub>) δ 165.9 (C=O), 159.7 (C=O), 143.9 (Ar-C), 126.3 (Ar-CH), 123.2 (Ar-C), 121.7 (Ar-C), 117.3 (Ar-CH), 114.8 (Ar-CH), 51.5 (O-CH<sub>3</sub>).

#### 5-Fluoro-1*H*-benzo[*d*]imidazol-2(3*H*)-one (**6e**)

Urea (0.95 g, 15.86 mmol), 4-fluoro-1,2 phenylenediamine (**1e**) (2.01 g, 15.86 mmol) and HCl (0.59g, 15.86 mmol) were reacted to form 5-fluoro-1*H*-benzo[*d*]imidazol-2(3*H*)-one (**6e**): **Physical characteristics**: brown solid; Yield: 1.95 g, 81 %; **Mp**: 299-301 °C (lit.<sup>5</sup> 300 °C); **<sup>1</sup>H NMR** (400 MHz, DMSO-*d*<sub>6</sub>) δ 6.71 (1H, t, *J*= 8 Hz, Ar-H), 6.42 (1H, d, *J*= 10.8 Hz, Ar-H), 6.27-6.22 (1H, m, Ar-H), 5.45 (2H, br s, N-H); **<sup>13</sup>C NMR** (101 MHz, DMSO-*d*<sub>6</sub>) δ 159.7 (C=O), 157.9 (d, *J*<sub>CF</sub>=233.4 Hz, Ar-C), 139.2 (d, *J*<sub>CF</sub>= 11.1 Hz, Ar-C), 124.6, 118.5 (d, *J*<sub>CF</sub>=10.1 Hz, Ar-CH), 102.4 (d, *J*<sub>CF</sub>=22.1 Hz, Ar-CH), 101.5 (d, *J*<sub>CF</sub>=25.2 Hz, Ar-CH).

#### 5-Chloro-1*H*-benzo[*d*]imidazol-2(3*H*)-one (**6f**)

Urea (0.84 g, 14 mmol), 4-chloro-1,2 phenylenediamine (**1f**) (2.02 g, 14 mmol) and HCl (0.51 g, 14 mmol) were reacted to form 5-chloro-1*H*-benzo[*d*]imidazol-2(3*H*)-one (**6f**): **Physical characteristics**: brown solid; Yield: 1.8 g, 75 %; **Mp**: 323-325 °C (lit.<sup>6</sup> 324-326 °C); **<sup>1</sup>H NMR** (400 MHz, DMSO-*d*<sub>6</sub>) δ 6.75-6.69 (2H, m, Ar-H), 6.53-6.50 (1H, m, Ar-H), 5.49 (2H, br s, N-H); **<sup>13</sup>C NMR** (101 MHz, DMSO-*d*<sub>6</sub>) δ 159.7 (C=O), 137.5 (Ar-C), 128.6 (Ar-C), 124.4 (Ar-C), 118.8 (Ar-CH), 117.1 (Ar-CH), 114.9 (Ar-CH).

#### 1*H*-Benzo[*d*]imidazole-2(3*H*)-thione (**6g**)

Thiourea (3.51 g, 46.2 mmol), *o*-phenylenediamine (**1a**) (5.02 g, 46.2 mmol) and HCl (1.68 g, 46.2 mmol) were reacted to form 1*H*-benzo[*d*]imidazole-2(3*H*)-thione (**6g**): **Physical characteristics**: brown solid; Yield: 5.6 g, 81 %; **Mp**: 115-117 °C (lit.<sup>1</sup> 114-118-279 °C); **<sup>1</sup>H NMR** (400 MHz, DMSO-*d*<sub>6</sub>) δ 6.56-6.54 (2H, m, Ar-H), 6.43-6.41 (2H, m, Ar-H), 4.71 (2H, br s, N-H); **<sup>13</sup>C NMR** (101 MHz, DMSO-*d*<sub>6</sub>) δ 183.9 (C=O), 132.7 (Ar-C), 119.6 (Ar-CH), 117.0 (Ar-CH).

#### 1*H*-Benzo[*d*]imidazol-2(3*H*)-imine (**6h**)

Guanidine hydrochloride (4.39 g, 46 mmol), *o*-phenylenediamine (**1a**) ( 5.01 g, 46 mmol) and HCl ( 1.68 g, 46 mmol) were reacted to form 1*H*-benzo[*d*]imidazol-2(3*H*)-imine (**6h**): **Physical characteristics**: brown solid; Yield: 4.61 g, 75 %; **Mp**: 181-183 °C (lit.<sup>7</sup> 182-184 °C); **<sup>1</sup>H NMR** (400 MHz, DMSO-*d*<sub>6</sub>) δ 7.09 (2H, br s, N-H); 6.59-6.57 (2H, m, Ar-H), 6.46-6.44 (2H, m, Ar-H), 5.51 (1H, br s, N-H); **<sup>13</sup>C NMR** (101 MHz, DMSO-*d*<sub>6</sub>) δ 158.2 (C=O), 133.9 (Ar-C), 118.3 (Ar-CH), 115.6 (Ar-CH).

**General procedure for the synthesis of 2-methyl-*N*-(2,2,4-trimethyl-2,3,4,5-tetrahydro-1,4-methanobenzo-1,5-diazepin-10-ylidene)propan-2-amine derivatives (10a-f)**

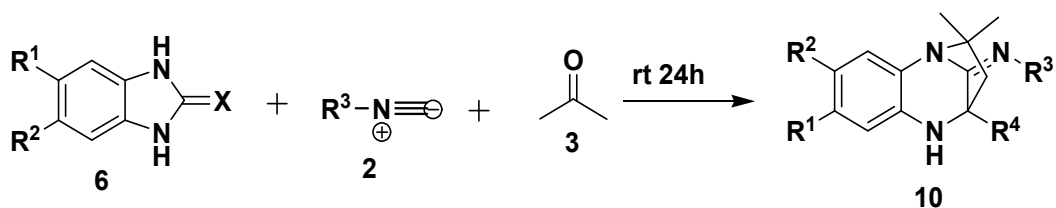

In a round-bottomed flask equipped with a magnetic stirrer bar, a mixture of 1*H*-benzo[*d*]imidazol-2(3*H*)-one derivatives (**6a-d**), isocyanide derivative (**2a-d**) and 2 equivalents of acetone (**3a**) was stirred at room temperature (rt) for 24 h, while being monitored by TLC. The solution was put under reduced pressure and the residue was purified by silica gel column chromatography using hexane-ethyl acetate as eluent to obtain the product.

**2-Methyl-*N*-(2,2,4-trimethyl-2,3,4,5-tetrahydro-1,4-methanobenzo-1,5-diazepin-10-ylidene)propan-2-amine (10a)**

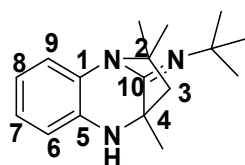

1*H*-Benzo[*d*]imidazol-2(3*H*)-imine (**6h**) (0.25 g, 1.87 mmol), *tert*-butyl isocyanide (**2a**) (0.17 g, 1.87 mmol) and acetone (**3a**) (0.22 g, 3.74 mmol, 0.30 ml) were reacted to give 2-methyl-*N*-(2,2,4-trimethyl-2,3,4,5-tetrahydro-1,4-methanobenzo-1,5-diazepin-10-ylidene)propan-2-amine (**10a**): **Physical characteristics**: yellow crystalline solid; Yield: 0.43 g, 84 %; **Mp**: 125-127 °C, **R<sub>f</sub>**: 0.8, hexane-ethyl acetate (80 % : 20 %); **<sup>1</sup>H NMR** (400 MHz, CDCl<sub>3</sub>) δ 6.94 (1H, t, *J*= 7.6 Hz, Ar-CH), 6.83 (1H, d, *J*= 7.6 Hz, Ar-CH), 6.67 (1H, t, *J*= 7.2 Hz, Ar-CH), 6.53 (1H, d, *J*= 8.0 Hz, Ar-CH), 3.90 (1H, br s, NH), 2.02 (1H, d, *J*= 13.2 Hz, CH<sub>2</sub>), 1.78 (1H, d, *J*= 13.2 Hz, CH<sub>2</sub>), 1.39 (3H, s, CH<sub>3</sub>), 1.28 (9H, s, (CH<sub>3</sub>)<sub>3</sub>), 1.16 (3H, s, CH<sub>3</sub>), 1.08 (3H, s, CH<sub>3</sub>), **<sup>13</sup>C NMR** (101 MHz, CDCl<sub>3</sub>) δ 167.2 (C-10), 140.7 (Ar-C), 137.3 (Ar-C), 129.2 (Ar-CH), 126.7 (Ar-CH), 118.9 (Ar-CH), 116.5 (Ar-CH), 65.4, 61.1, 55.7, 53.4 (C-3), 32.5 (CH<sub>3</sub>), 30.9 ((CH<sub>3</sub>)<sub>3</sub>), 26.6 (CH<sub>3</sub>), 21.3 (CH<sub>3</sub>); **FT-IR**  $\nu_{\text{max}}$ /cm<sup>-1</sup>: 3257, 2922, 1696, 1596, 1469; **HRMS (ESI-TOF)** *m/z*: [M+H]<sup>+</sup> Calculated for C<sub>17</sub>H<sub>26</sub>N<sub>3</sub><sup>+</sup> 272.2121 found 272.2119.

**2,4,4-Trimethyl-*N*-(2,2,4-trimethyl-2,3,4,5-tetrahydro-1,4-methanobenzo-1,5-diazepin-10-ylidene)pentan-2-amine (10b)**

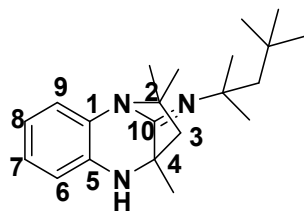

1*H*-Benzo[*d*]imidazol-2(3*H*)-imine (**6h**) (0.25 g, 1.87 mmol), 1,1,3,3-tetramethylbutyl isocyanide (**2b**) (0.26 g, 1.87 mmol) and acetone (**3a**) (0.22 g, 3.74 mmol, 0.30 ml) were reacted to give 2,4,4-trimethyl-*N*-(2,2,4-trimethyl-2,3,4,5-tetrahydro-1,4-methanobenzo-1,5-diazepin-10-ylidene)pentan-2-amine (**10b**): **Physical characteristics**: brown paste; Yield: 0.49 g, 80 %, **R<sub>f</sub>**: 0.9, hexane-ethyl acetate (80 % : 20 %); **<sup>1</sup>H NMR** (400 MHz, CDCl<sub>3</sub>) δ 6.94 (1H, t, *J*= 7.6 Hz, Ar-CH), 6.82 (1H, d, *J*= 8 Hz, Ar-CH), 6.66 (1H, t, *J*= 7.6 Hz, Ar-CH), 6.52 (1H, d, *J*= 8.0 Hz, Ar-CH), 3.87 (1H, br s, NH), 2.01 (1H, d, *J*= 13.2 Hz, CH<sub>2</sub>), 1.78 (1H, d, *J*= 13.2 Hz, CH<sub>2</sub>), 1.61 (1H, d, *J*= 14.0 Hz, CH<sub>2</sub>), 1.48-1.46 (1H, m, CH<sub>2</sub>), 1.46 (3H, s, CH<sub>3</sub>), 1.38 (3H, s, CH<sub>3</sub>), 1.23 (3H, s, CH<sub>3</sub>), 1.16 (3H, s, CH<sub>3</sub>), 1.08 (3H, s, CH<sub>3</sub>), 0.87 (9H, s, (CH<sub>3</sub>)<sub>3</sub>), **<sup>13</sup>C NMR** (101 MHz, CDCl<sub>3</sub>) δ 164.9 (C-10), 140.9 (Ar-C), 137.2 (Ar-C), 129.3 (Ar-CH), 126.7 (Ar-CH), 118.9 (Ar-

CH), 116.4 (Ar-CH), 65.3, 61.3, 59.6, 57.4 (CH<sub>2</sub>), 53.4 (C-3), 32.7 (CH<sub>3</sub>), 31.8 ((CH<sub>3</sub>)<sub>3</sub>), 30.9 (CH<sub>3</sub>), 30.2 (CH<sub>3</sub>), 26.7 (CH<sub>3</sub>), 21.4 (CH<sub>3</sub>); **FT-IR**  $\nu_{\max}/\text{cm}^{-1}$ : 2955, 1708, 1601, 1482; **HRMS (ESI-TOF)**  $m/z$ : [M+H]<sup>+</sup> Calculated for C<sub>21</sub>H<sub>34</sub>N<sub>3</sub><sup>+</sup> 328.2747 found 328.2731.

**N-(2,2,4-Trimethyl-2,3,4,5-tetrahydro-1,4-methanobenzo-1,5-diazepin-10-ylidene)cyclohexanamine (10c)**

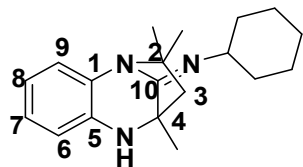

1*H*-benzo[*d*]imidazol-2(3*H*)-imine (**6h**) (0.25 g, 1.87 mmol), cyclohexyl isocyanide (**2c**) (0.21 g, 1.87 mmol) and acetone (**3a**) (0.22 g, 3.74 mmol, 0.30 ml) were reacted to give *N*-(2,2,4-trimethyl-2,3,4,5-tetrahydro-1,4-methanobenzo-1,5-diazepin-10-ylidene)cyclohexanamine (**10c**): **Physical characteristics**: yellow solid; Yield: 0.47 g, 84 %, **Mp**: 120-122 °C, **R<sub>f</sub>**: 0.5, hexane-ethyl acetate (80 % : 20 %); **<sup>1</sup>H NMR** (400 MHz, CDCl<sub>3</sub>)  $\delta$  6.94 (1H, t, *J*= 7.6 Hz, Ar-CH), 6.86 (1H, d, *J*= 7.6 Hz, Ar-CH), 6.65 (1H, t, *J*= 7.6 Hz, Ar-CH), 6.51 (1H, d, *J*= 8.0 Hz, Ar-CH), 4.03 (1H, s, CH), 3.75 (1H, br s, NH), 2.06 (1H, d, *J*= 13.2 Hz, CH<sub>2</sub>), 1.82 (1H, d, *J*= 13.2 Hz, CH<sub>2</sub>), 1.73-1.49 (4H, m, cyclohexyl), 1.44 (3H, s, CH<sub>3</sub>), 1.39-1.28 (2H, m, cyclohexyl), 1.25-1.13 (4H, m, cyclohexyl), 1.10 (3H, s, CH<sub>3</sub>), 1.06 (3H, s, CH<sub>3</sub>), **<sup>13</sup>C NMR** (101 MHz, CDCl<sub>3</sub>)  $\delta$  168.7 (C-10), 140.8 (Ar-C), 136.8 (Ar-C), 128.9 (Ar-CH), 126.9 (Ar-CH), 118.9 (Ar-CH), 116.1 (Ar-CH), 64.8, 60.1, 58.7 (CH), 54.0 (C-3), 33.9 (CH<sub>2</sub>), 33.6 (CH<sub>2</sub>), 32.1 (CH<sub>3</sub>), 26.2 (CH<sub>3</sub>), 25.88 (CH<sub>2</sub>), 25.1 (CH<sub>2</sub>), 24.9 (CH<sub>2</sub>), 20.6 (CH<sub>3</sub>); **FT-IR**  $\nu_{\max}/\text{cm}^{-1}$ : 3235, 2923, 2851, 1696, 1598, 1470; **HRMS (ESI-TOF)**  $m/z$ : [M+H]<sup>+</sup> Calculated for C<sub>19</sub>H<sub>28</sub>N<sub>3</sub><sup>+</sup> 298.2278 found 298.2278.

**1-Tosyl-N-(2,2,4-trimethyl-2,3,4,5-tetrahydro-1,4-methanobenzo-1,5-diazepin-10-ylidene)methanamine (10d)**

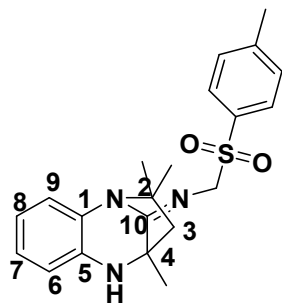

1*H*-benzo[*d*]imidazol-2(3*H*)-imine (**6h**) (0.25 g, 1.87 mmol), toluenesulfonylmethyl isocyanide (**2d**) (0.36 g, 1.87 mmol) and acetone (**3a**) (0.22 g, 3.74 mmol, 0.30 ml) were reacted to give 1-tosyl-*N*-(2,2,4-trimethyl-2,3,4,5-tetrahydro-1,4-methanobenzo-1,5-diazepin-10-ylidene)methanamine (**10d**): **Physical characteristics**: yellow solid; Yield: 0.5 g, 71 %, **Mp**: 95-97 °C, **R<sub>f</sub>**: 0.2, hexane-ethyl acetate (80 % : 20 %); **<sup>1</sup>H NMR** (400 MHz, CDCl<sub>3</sub>)  $\delta$  7.67 (2H, d, *J*= 8 Hz, Ar-H), 7.11 (2H, d, *J*= 7.6 Hz, Ar-H), 6.84 (1H, t, *J*= 7.2 Hz, Ar-CH), 6.64 (1H, d, *J*= 7.6 Hz, Ar-CH), 6.53 (1H, t, *J*= 7.6 Hz, Ar-CH), 6.33 (1H, d, *J*= 7.6 Hz, Ar-CH), 5.31 (1H, d, *J*= 13.6 Hz, S-CH<sub>2</sub>), 4.69 (1H, d, *J*= 13.2 Hz, S-CH<sub>2</sub>), 3.77 (1H, br s, NH), 2.29 (Ar-CH<sub>3</sub>), 1.97 (1H, d, *J*= 13.2 Hz, CH<sub>2</sub>), 1.68 (1H, d, *J*= 13.2 Hz, CH<sub>2</sub>), 1.34 (3H, s, CH<sub>3</sub>), 0.91 (3H, s, CH<sub>3</sub>), 0.82 (3H, s, CH<sub>3</sub>); **<sup>13</sup>C NMR** (101 MHz, CDCl<sub>3</sub>)  $\delta$  177.3 (C-10), 143.4 (Ar-C), 139.3(Ar-C), 133.7 (Ar-C), 133.6 (Ar-C), 128.3, (Ar-CH) 128.0 (Ar-CH), 127.7 (Ar-CH), 126.4 (Ar-CH), 118.0 (Ar-CH), 115.0 (Ar-CH), 71.0 (S-CH<sub>2</sub>), 64.7, 59.5, 52.3 (C-3), 30.4 (CH<sub>3</sub>), 24.9 (CH<sub>3</sub>), 20.7 (CH<sub>3</sub>), 18.9 (CH<sub>3</sub>); **FT-IR**  $\nu_{\max}/\text{cm}^{-1}$ : 3348, 2961, 2925, 2855, 1704, 1598, 1480; **HRMS (ESI-TOF)**  $m/z$ : [M+H]<sup>+</sup> Calculated for C<sub>21</sub>H<sub>26</sub>N<sub>3</sub>O<sub>2</sub>S<sup>+</sup> 384.1740 found 384.1742.

**2-Methyl-N-(2,2,4,7,8-pentamethyl-2,3,4,5-tetrahydro-1,4-methanobenzo-1,5-diazepin-10-ylidene)propan-2-amine (10e)**



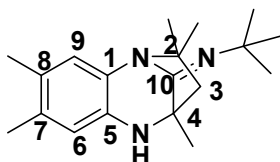

5,6-Dimethyl-1*H*-benzo[*d*]imidazol-2(3*H*)-one (**6b**) (0.25 g, 1.54 mmol), *tert*-butyl isocyanide (**2a**) (0.17 g, 1.54 mmol) and acetone (**3a**) (0.18 g, 3.08 mmol, 0.22 ml) were reacted to give 2-methyl-*N*-(2,2,4,7,8-pentamethyl-2,3,4,5-tetrahydro-1,4-methanobenzo-1,5-diazepin-10-ylidene)propan-2-amine (**10e**): **Physical characteristics**: white crystalline solid; Yield: 0.34 g, 74 %; **Mp**: 121-123 °C, **R<sub>f</sub>**: 0.7, hexane-ethyl acetate (80 % : 20 %); **<sup>1</sup>H NMR** (400 MHz, CDCl<sub>3</sub>) δ 6.59 (1H, s, Ar-H), 6.35 (1H, s, Ar-H), 3.71 (1H, br s, NH), 2.11 (6H, s, 2 x CH<sub>3</sub>), 1.95 (1H, d, *J*= 13.2 Hz, CH<sub>2</sub>), 1.74 (1H, d, *J*= 13.2 Hz, CH<sub>2</sub>), 1.37 (3H, s, CH<sub>3</sub>), 1.27 (9H, s, (CH<sub>3</sub>)<sub>3</sub>), 1.12 (3H, s, CH<sub>3</sub>), 1.07 (3H, s, CH<sub>3</sub>), **<sup>13</sup>C NMR** (101 MHz, CDCl<sub>3</sub>) δ 168.1 (C-10), 138.0 (Ar-C), 135.5 (Ar-C), 134.7 (Ar-C), 129.9 (Ar-CH), 127.3 (Ar-C), 118.4 (Ar-CH), 65.1, 60.9, 55.6, 52.9 (C-3), 32.4 (CH<sub>3</sub>), 30.9 ((CH<sub>3</sub>)<sub>3</sub>), 26.5 (CH<sub>3</sub>), 21.5 (CH<sub>3</sub>), 19.6 (CH<sub>3</sub>), 19.1 (CH<sub>3</sub>); **FT-IR**  $\nu_{\max}/\text{cm}^{-1}$ : 3277, 2923, 1723, 1596; **HRMS (ESI-TOF)** *m/z*: [M+H]<sup>+</sup> Calculated for C<sub>19</sub>H<sub>30</sub>N<sub>3</sub><sup>+</sup> 300.2434 found 300.2436.

**2,4,4-trimethyl-*N*-(2,2,4,7,8-pentamethyl-2,3,4,5-tetrahydro-1,4-methanobenzo-1,5-diazepin-10-ylidene)pentan-2-amine (10f)**

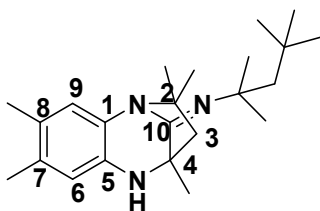

5,6-Dimethyl-1*H*-benzo[*d*]imidazol-2(3*H*)-one (**6b**) (0.25 g, 1.54 mmol), 1,1,3,3-tetramethylbutyl isocyanide (**2b**) (0.21 g, 1.54 mmol) and acetone (**3a**) (0.18 g, 3.08 mmol, 0.27 ml) were reacted to give 2,4,4-trimethyl-*N*-(2,2,4,7,8-pentamethyl-2,3,4,5-tetrahydro-1,4-methanobenzo-1,5-diazepin-10-ylidene)pentan-2-amine (**10f**): **Physical characteristics**: brown solid; Yield: 0.36 g, 67 %; **Mp**: 91-93 °C, **R<sub>f</sub>**: 0.9, hexane-ethyl acetate (80 % : 20 %); **<sup>1</sup>H NMR** (400 MHz, CDCl<sub>3</sub>) δ 6.57 (1H, s, Ar-H), 6.33 (1H, s, Ar-H), 3.60 (1H, br s, NH), 2.09 (6H, s, 2 x CH<sub>3</sub>), 1.93 (1H, d, *J*= 12.8 Hz, CH<sub>2</sub>), 1.73 (1H, d, *J*= 13.2 Hz, CH<sub>2</sub>), 1.60 (1H, d, *J*= 14 Hz, CH<sub>2</sub>), 1.45 (1H, d, *J*= 12 Hz, CH<sub>2</sub>), 1.44 (3H, s, CH<sub>3</sub>), 1.35 (3H, s, CH<sub>3</sub>), 1.19 (3H, s, CH<sub>3</sub>), 1.19 (3H, s, CH<sub>3</sub>), 1.05 (3H, s, CH<sub>3</sub>), 0.87 (9H, s, (CH<sub>3</sub>)<sub>3</sub>), **<sup>13</sup>C NMR** (101 MHz, CDCl<sub>3</sub>) δ 166.0 (C-10), 138.2 (Ar-C), 135.5 (Ar-C), 134.7 (Ar-C), 129.97 (Ar-CH), 127.29 (Ar-C), 118.29 (Ar-CH), 65.05, 61.21, 59.42, 57.39 (C-3), 52.89 (CH<sub>2</sub>), 32.53 (CH<sub>3</sub>), 31.84 ((CH<sub>3</sub>)<sub>3</sub>), 31.06, 29.95 (CH<sub>3</sub>), 26.64 (CH<sub>3</sub>), 21.54 (CH<sub>3</sub>), 19.60 (CH<sub>3</sub>); **FT-IR**  $\nu_{\max}/\text{cm}^{-1}$ : 3312, 2928, 1689, 1616; **HRMS (ESI-TOF)** *m/z*: [M+H]<sup>+</sup> Calculated for C<sub>23</sub>H<sub>38</sub>N<sub>3</sub><sup>+</sup> 356.3060 found 356.3057.

**General method for the synthesis of methyl 2-(*tert*-butylamino)-3,3-dimethyl-3,4-dihydroquinoxaline-6-carboxylate derivatives (11a-h)**

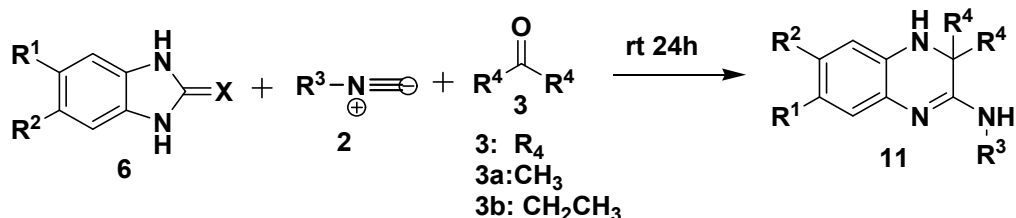

In a round-bottomed flask equipped with a magnetic stirrer bar, a mixture of 1*H*-benzo[*d*]imidazol-2(3*H*)-one derivatives (**6e-h**), isocyanide derivative (**2a-b**) and 2 equivalents of acetone (**3a**) / or 3-pentanone (**3b**) was stirred at room temperature (rt) for 24 h, while being monitored by TLC. The solvent was removed under reduced pressure and the residue was purified by silica gel column chromatography using hexane-ethyl acetate as eluent to obtain the product.

### Methyl 2-(*tert*-butylamino)-3,3-dimethyl-3,4-dihydroquinoxaline-6-carboxylate (11a)

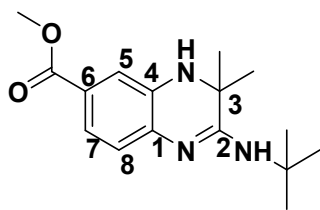

Methyl 2-oxo-2,3-dihydro-1*H*-benzo[*d*]imidazole-5-carboxylate (**6d**) (0.25 g, 1.30 mmol), *tert*-butyl isocyanide (**2a**) (0.11 g, 1.30 mmol) and acetone (**3a**) (0.15 g, 2.60 mmol, 0.14 ml) were reacted to give methyl 2-(*tert*-butylamino)-3,3-dimethyl-3,4-dihydroquinoxaline-6-carboxylate (**11a**): **Physical characteristics**: white solid; Yield: 0.18 g, 48%; **Mp**: 130-132 °C, **R<sub>f</sub>**: 0.2, hexane-ethyl acetate (80 % : 20 %); **<sup>1</sup>H NMR** (400 MHz, CDCl<sub>3</sub>) δ 7.50 (1H, d, *J* = 8 Hz, Ar-H), 7.28 (1H, d, *J* = 1.6 Hz, Ar-H), 7.07 (1H, d, *J* = 8.4 Hz, Ar-H), 4.46 (1H, br s, NH), 3.89 (3H, s, O-CH<sub>3</sub>), 3.60 (1H, br s, NH), 1.51 (9H, s, (CH<sub>3</sub>)<sub>3</sub>), 1.31 (6H, s, 2 x CH<sub>3</sub>), **<sup>13</sup>C NMR** (101 MHz, CDCl<sub>3</sub>) 167.8 (C=O), 159.4 (C-2), 140.2 (Ar-C), 134.5 (Ar-C), 123.9 (Ar-C), 123.5 (Ar-CH), 121.94 (Ar-CH), 114.8 (Ar-CH), 52.2, 51.8 (CH<sub>3</sub>-O), 50.7, 29.1 ((CH<sub>3</sub>)<sub>3</sub>), 26.23 (2 x CH<sub>3</sub>); **FT-IR**  $\nu_{\max}/\text{cm}^{-1}$ : 3675, 3448, 3351, 2901, 2971, 1693, 1616, 1571; **HRMS (ESI-TOF)** *m/z*: [M+H]<sup>+</sup> Calculated for C<sub>16</sub>H<sub>24</sub>N<sub>3</sub>O<sub>2</sub><sup>+</sup> 290.1863 found 290.1865.

### Methyl 3,3-dimethyl-2-((2,4,4-trimethylpentan-2-yl)amino)-3,4-dihydroquinoxaline-6-carboxylate (11b)

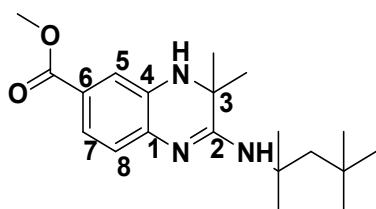

Methyl 2-oxo-2,3-dihydro-1*H*-benzo[*d*]imidazole-5-carboxylate (**6d**) (0.25 g, 1.30 mmol), 1,1,3,3-tetramethylbutyl isocyanide (**2b**) (0.18 g, 1.30 mmol) and acetone (**3a**) (0.15 g, 2.60 mmol, 0.23 ml) were reacted to give methyl 3,3-dimethyl-2-((2,4,4-trimethylpentan-2-yl)amino)-3,4-dihydroquinoxaline-6-carboxylate (**11b**): **Physical characteristics**: white solid; Yield: 0.23 g, 52%; **Mp**: 150-152 °C, **R<sub>f</sub>**: 0.5, hexane-ethyl acetate (80 % : 20 %); **<sup>1</sup>H NMR** (400 MHz, CDCl<sub>3</sub>) δ 7.51 (1H, d, *J* = 8 Hz, Ar-H), 7.29 (1H, d, *J* = 5.2 Hz, Ar-H), 7.06 (1H, d, *J* = 6.8 Hz, Ar-H), 4.52 (1H, br s, NH), 3.89 (3H, s, O-CH<sub>3</sub>), 3.60 (1H, br s, NH), 1.93 (2H, s, CH<sub>2</sub>), 1.58 (6H, s, 2 x CH<sub>3</sub>), 1.30 (6H, s, 2 x CH<sub>3</sub>), 1.07 (9H, s, (CH<sub>3</sub>)<sub>3</sub>), **<sup>13</sup>C NMR** (101 MHz, CDCl<sub>3</sub>) 167.8 (C=O), 158.8 (C-2), 140.4 (Ar-C), 134.5 (Ar-C), 123.7 (Ar-C), 123.4 (Ar-CH), 121.9 (Ar-CH), 114.8 (Ar-CH), 56.2, 52.3 (CH<sub>2</sub>), 51.8, 50.6, 31.9, 31.8 ((CH<sub>3</sub>)<sub>3</sub>), 29.2, (CH<sub>3</sub>), 26.2 (CH<sub>3</sub>); **FT-IR**  $\nu_{\max}/\text{cm}^{-1}$ : 3675, 3478, 3346, 2971, 2901, 1696, 1620, 1567; **HRMS (ESI-TOF)** *m/z*: [M+H]<sup>+</sup> Calculated for C<sub>20</sub>H<sub>32</sub>N<sub>3</sub>O<sub>2</sub><sup>+</sup> 346.2489 found 346.2492.

### 6-Fluoro-3,3-dimethyl-*N*-(2,4,4-trimethylpentan-2-yl)-3,4-dihydroquinoxalin-2-amine (11c) and 7-Fluoro-3,3-dimethyl-*N*-(2,4,4-trimethylpentan-2-yl)-3,4-dihydroquinoxalin-2-amine (11d)

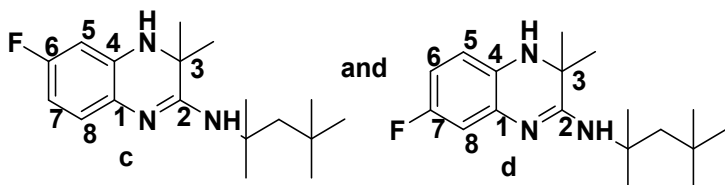

5-Fluoro-1*H*-benzo[*d*]imidazol-2(3*H*)-one (**6e**) (0.25 g, 1.64 mmol), 1,1,3,3-tetramethyl butyl isocyanide (**2b**) (0.23 g, 1.64 mmol) and acetone (**3a**) (0.19 g, 3.28 mmol, 0.24 ml) were reacted to give (*E*)-*N*-(6-fluoro-3,3-dimethyl-3,4-dihydroquinoxalin-2(1*H*)-ylidene)-2,4,4-trimethylpentan-2-amine (**11c**) and (*E*)-*N*-(7-fluoro-3,3-dimethyl-3,4-dihydroquinoxalin-2(1*H*)-ylidene)-2,4,4-trimethylpentan-2-amine (**11d**): **Physical characteristics (11c)**: yellow solid; Yield: 0.12 g, 30%; **Mp**: 108-110 °C, **R<sub>f</sub>**: 0.5, hexane-ethyl acetate (80 % : 20 %); **<sup>1</sup>H NMR** (400 MHz, CDCl<sub>3</sub>) δ 6.76 (1H, *J* = 6.8

Hz, Ar-H), 6.49-6.44 (2H, m, Ar-H), 4.36 (1H, br s, NH), 3.33 (1H, br s, NH), 1.89 (2H, s, CH<sub>2</sub>), 1.52 (6H, s, 2 x CH<sub>3</sub>), 1.24 (6H, s, 2 x CH<sub>3</sub>), 1.03 (9H, s, (CH<sub>3</sub>)<sub>3</sub>); <sup>13</sup>C NMR (101 MHz, CDCl<sub>3</sub>) 167.1 (C-2), 159.2 (d, J<sub>CF</sub> = 254.6 Hz, Ar-C), 146.5 (Ar-C), 130.8 (Ar-C), 113.7 (d, J<sub>CF</sub> = 9.1 Hz, Ar-CH), 110.5 (d, J<sub>CF</sub> = 22.1 Hz, Ar-CH), 108.0 (d, J<sub>CF</sub> = 24.1 Hz, Ar-CH), 65.6, 56.0, 52.3 (CH<sub>2</sub>), 50.7, 31.9 (CH<sub>3</sub>), 31.8 ((CH<sub>3</sub>)<sub>3</sub>), 29.2 (CH<sub>3</sub>), 26.0 (2CH<sub>3</sub>); **FT-IR** ν<sub>max</sub>/cm<sup>-1</sup>: 3675, 3455, 3351, 2901, 2971, 2921, 1770, 1622, 1577; **HRMS (ESI-TOF)** m/z: [M+H]<sup>+</sup> Calculated for C<sub>18</sub>H<sub>29</sub>FN<sub>3</sub><sup>+</sup> 306.2340 found 306.2348.

**Physical characteristics(11d)**: yellow solid; Yield: 0.09 g, 22%; **Mp**: 105-107 °C, **R<sub>f</sub>**: 0.8, hexane-ethyl acetate (80 % : 20 %); <sup>1</sup>H NMR (400 MHz, CDCl<sub>3</sub>) δ 6.76 (1H, J = 6.8 Hz, Ar-H), 6.51-6.42 (2H, m, Ar-H), 4.36 (1H, br s, NH), 3.33 (1H, br s, NH), 1.89 (2H, s, CH<sub>2</sub>), 1.52 (6H, s, 2 x CH<sub>3</sub>), 1.24 (6H, s, 2 x CH<sub>3</sub>), 1.03 (9H, s, (CH<sub>3</sub>)<sub>3</sub>); <sup>13</sup>C NMR (101 MHz, CDCl<sub>3</sub>) 160.5 (C-2), 158.1 (Ar-C), 157.7 (d, J<sub>CF</sub> = 236.5 Hz, Ar-C), 130.8 (Ar-C), 113.7 (d, J<sub>CF</sub> = 9.1 Hz, Ar-CH), 110.4 (d, J<sub>CF</sub> = 23.1 Hz, Ar-CH), 108.0 (d, J<sub>CF</sub> = 23.1 Hz, Ar-CH), 87.1, 56.0, 52.3 (CH<sub>2</sub>), 50.7, 31.9 (CH<sub>3</sub>), 31.8 ((CH<sub>3</sub>)<sub>3</sub>), 29.2 (CH<sub>3</sub>), 26.0 (2CH<sub>3</sub>); **FT-IR** ν<sub>max</sub>/cm<sup>-1</sup>: 3675, 3455, 2987, 2971, 2904, 1770, 1622, 1515; **HRMS (ESI-TOF)** m/z: [M+H]<sup>+</sup> Calculated for C<sub>18</sub>H<sub>29</sub>FN<sub>3</sub><sup>+</sup> 306.2340 found 306.2345.

#### 6-Chloro-3,3-dimethyl-N-(2,4,4-trimethylpentan-2-yl)-3,4-dihydroquinoxalin-2-amine (11e)

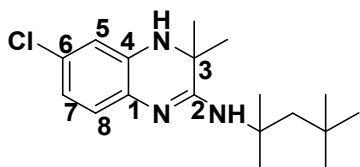

5-Chloro-1*H*-benzo[*d*]imidazol-2(3*H*)-one (**6f**) (0.25 g, 1.48 mmol), 1,1,3,3-tetramethyl butyl isocyanide (**2b**) (0.21 g, 1.48 mmol) and acetone (**3a**) (0.17 g, 2.96 mmol, 0.27) were reacted to give 6-chloro-3,3-dimethyl-*N*-(2,4,4-trimethylpentan-2-yl)-3,4-dihydroquinoxalin-2-amine (**11e**): **Physical characteristics**: yellow solid; Yield: 0.18 g, 46%; **Mp**: 105-107 °C, **R<sub>f</sub>**: 0.6, hexane-ethyl acetate (80 % : 20 %); <sup>1</sup>H NMR (400 MHz, CDCl<sub>3</sub>) δ 7.02 (1H, s, Ar-H), 6.73 (1H, d, J = 8 Hz, Ar-H), 6.44 (1H, d, J = 8 Hz, Ar-H), 4.34 (1H, br s, NH), 3.44 (1H, br s, NH), 1.89 (2H, s, CH<sub>2</sub>), 1.52 (6H, s, 2 x CH<sub>3</sub>), 1.25 (6H, s, 2 x CH<sub>3</sub>), 1.03 (9H, s, (CH<sub>3</sub>)<sub>3</sub>), <sup>13</sup>C NMR (101 MHz, CDCl<sub>3</sub>) 167.8 (C-2), 158.8 (Ar-C), 140.5 (Ar-C), 128.4 (Ar-CH), 134.4 (Ar-CH), 121.9 (Ar-CH), 114.9 (Ar-CH), 56.3, 52.4 (CH<sub>2</sub>), 51.8, 50.6, 31.9 (CH<sub>3</sub>), 31.8 ((CH<sub>3</sub>)<sub>3</sub>), 29.2 (2CH<sub>3</sub>), 26.2 (CH<sub>3</sub>); **FT-IR** ν<sub>max</sub>/cm<sup>-1</sup>: 3675, 2987, 2972, 2901, 1710, 1650; **HRMS (ESI-TOF)** m/z: [M+H]<sup>+</sup> Calculated for C<sub>18</sub>H<sub>29</sub>ClN<sub>3</sub><sup>+</sup> 322.2045 found 322.2055.

#### *N*-(*tert*-butyl)-6,7-Dichloro-3,3-dimethyl-3,4-dihydroquinoxalin-2-amine (11f)

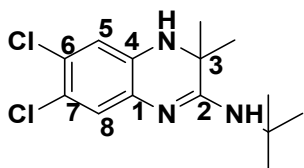

5,6-Dichloro-1*H*-benzo[*d*]imidazol-2(3*H*)-one (**6c**) (0.25 g, 1.28 mmol), *tert*-butyl isocyanide (**2a**) (0.17 g, 1.28 mmol) and acetone (**3a**) (0.15 g, 2.56 mmol, 0.22 ml) were reacted to give *N*-(*tert*-butyl)-6,7-dichloro-3,3-dimethyl-3,4-dihydroquinoxalin-2-amine (**11f**): **Physical characteristics**: brown solid; Yield: 0.28 g, 74 %; **Mp**: 144-146 °C, **R<sub>f</sub>**: 0.7, hexane-ethyl acetate (80 % : 20 %); <sup>1</sup>H NMR (400 MHz, CDCl<sub>3</sub>) δ 7.09 (1H, s, Ar-H), 6.58 (1H, s, Ar-H), 4.31 (1H, br s, NH), 3.62 (1H, br s, NH), 1.45 (9H, s, (CH<sub>3</sub>)<sub>3</sub>), 1.26 (6H, s, 2 x CH<sub>3</sub>), <sup>13</sup>C NMR (101 MHz, CDCl<sub>3</sub>) δ 158.2 (C-2), 135.4 (Ar-C), 134.5 (Ar-C), 124.7 (Ar-CH), 121.6 (Ar-C), 114.2 (Ar-CH), 68.3, 51.9, 28.9 ((CH<sub>3</sub>)<sub>3</sub>), 26.1 (CH<sub>3</sub>), 18.9 (CH<sub>3</sub>); **FT-IR** ν<sub>max</sub>/cm<sup>-1</sup>: 3675, 3460, 1700, 1605; **HRMS (ESI-TOF)** m/z: [M+H]<sup>+</sup> Calculated for C<sub>14</sub>H<sub>20</sub>C<sub>12</sub>N<sub>3</sub><sup>+</sup> 300.1029 found 300.1039.

#### 6,7-Dichloro-3,3-dimethyl-*N*-(2,4,4-trimethylpentan-2-yl)-3,4-dihydroquinoxalin-2-amine (11g)

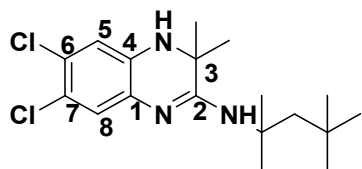

5,6-Dichloro-1*H*-benzo[*d*]imidazol-2(3*H*)-one (**6c**) (0.25 g, 1.28 mmol), 1,1,3,3-tetramethylbutyl isocyanide (**2b**) (0.18 g, 1.28 mmol) and acetone (**3a**) (0.15 g, 2.56 mmol, 0.23 ml) were reacted to give 6,7-dichloro-3,3-dimethyl-*N*-(2,4,4-trimethylpentan-2-yl)-3,4-dihydroquinoxalin-2-amine (**11g**): **Physical characteristics**: brown solid; Yield: 0.34 g, 76 %; **Mp**: 157-159 °C, **R<sub>f</sub>**: 0.7, hexane-ethyl acetate (80 % : 20 %); **<sup>1</sup>H NMR** (400 MHz, CDCl<sub>3</sub>) δ 7.08 (1H, s, Ar-H), 6.59 (1H, s, Ar-H), 4.38 (1H, br s, NH), 3.62 (1H, br s, NH), 1.87 (2H, s, CH<sub>2</sub>), 1.51 (6H, s, 2 x CH<sub>3</sub>), 1.25 (6H, s, 2 x CH<sub>3</sub>), 1.02 (9H, s, (CH<sub>3</sub>)<sub>3</sub>), **<sup>13</sup>C NMR** (101 MHz, CDCl<sub>3</sub>) δ 157.8 (C-2), 135.7 (Ar-C), 134.6 (Ar-C), 124.7 (Ar-CH), 124.3 (Ar-C), 121.7 (Ar-C), 114.3 (Ar-CH), 68.2, 56.1, 52.1 (CH<sub>2</sub>), 50.5, 31.8 ((CH<sub>3</sub>)<sub>3</sub>), 29.2 (CH<sub>3</sub>), 26.2 (CH<sub>3</sub>), 19.0 (CH<sub>3</sub>); **FT-IR**  $\nu_{\max}/\text{cm}^{-1}$ : 3456, 3356, 1609, 1573; **HRMS (ESI-TOF)** *m/z*: [M+H]<sup>+</sup> Calculated for C<sub>18</sub>H<sub>28</sub>Cl<sub>2</sub>N<sub>3</sub><sup>+</sup> 356.1655 found 356.1660.

#### *N*-(*tert*-butyl)-3,3-diethyl-3,4-dihydroquinoxalin-2-amine (**11h**)

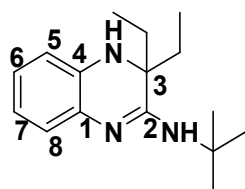

1*H*-benzo[*d*]imidazol-2(3*H*)-imine (**6h**) (0.25 g, 1.87 mmol), *tert*-butyl isocyanide (**2a**) (0.16 g, 1.87 mmol) and 3 pentanone (**3b**) (0.32 g, 3.73 mmol, 0.41) were reacted to give *N*-(*tert*-butyl)-3,3-diethyl-3,4-dihydroquinoxalin-2-amine (**11h**): **Physical characteristics**: yellow solid; Yield: 0.37 g, 76 %; **Mp**: 138-140 °C, **R<sub>f</sub>**: 0.5, hexane-ethyl acetate (80 % : 20 %); **<sup>1</sup>H NMR** (400 MHz, CDCl<sub>3</sub>) δ 6.95 (1H, d, *J* = 7.6 Hz, Ar-H), 6.74 (1H, t, *J* = 7.2 Hz, Ar-H), 6.61 (1H, t, *J* = 7.2 Hz, Ar-H), 6.42 (1H, d, *J* = 7.6 Hz, Ar-H), 4.09 (1H, br s, NH), 3.26 (1H, br s, NH), 1.68 (2H, q, *J* = 7.2 Hz, CH<sub>2</sub>), 1.55 (2H, s, CH<sub>2</sub>), 1.47 (9H, s, (CH<sub>3</sub>)<sub>3</sub>), 0.99 (6H, t, *J* = 7.2, 2 x CH<sub>3</sub>), **<sup>13</sup>C NMR** (101 MHz, CDCl<sub>3</sub>) δ 154.9 (C-2), 135.5 (Ar-C), 133.7 (Ar-C), 123.9 (Ar-C), 122.9 (Ar-C), 118.1 (Ar-C), 111.8 (Ar-C), 57.9, 51.6, 32.4 (2 x CH<sub>2</sub>), 29.1 ((CH<sub>3</sub>)<sub>3</sub>), 8.2 (2 x CH<sub>3</sub>); **FT-IR**  $\nu_{\max}/\text{cm}^{-1}$ : 3449, 3359, 2962, 1683, 1611, 1584; **HRMS (ESI-TOF)** *m/z*: [M+H]<sup>+</sup> Calculated for C<sub>16</sub>H<sub>26</sub>N<sub>3</sub><sup>+</sup> 260.2121 found 260.2125.

#### General procedure for the synthesis of 2-methyl-*N*-(2,2,4-trimethyl-2,3,4,5-tetrahydro-1,4-methanobenzo-1,5-diazepin-10-ylidene)propan-2-amine derivatives using acetone-*d*<sub>6</sub> (**10g-h**) (**Green-deuterated-atoms**)

In a round-bottomed flask equipped with a magnetic stirrer bar, a mixture of 1*H*-Benzo[*d*]imidazol-2(3*H*)-one (**6a**), isocyanide derivative (**2b-c**) and 2 equivalents of acetone-*d*<sub>6</sub> (**3c**) was stirred at room temperature (rt) for 24 h, while being monitored by TLC. The solvent was removed under reduced pressure and the residue was purified by silica gel column chromatography using hexane-ethyl acetate as eluent to obtain the product.

#### 2,4,4-Trimethyl-*N*-(2,2,4-trimethyl-2,3,4,5-tetrahydro-1,4-methanobenzo-1,5-diazepin-10-ylidene)pentan-2-amine (**10g**)

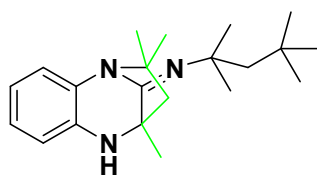

1*H*-Benzo[*d*]imidazol-2(3*H*)-one (**6a**) (0.25 g, 1.87 mmol), 1,1,3,3-tetramethylbutyl isocyanide (**2b**) (0.26 g, 1.87 mmol) and acetone-*D* (**3c**) (0.24 g, 3.74 mmol, 0.31 ml) were reacted to give 2,4,4-trimethyl-*N*-(2,2,4-trimethyl-2,3,4,5-tetrahydro-1,4-methanobenzo-1,5-diazepin-10-ylidene)pentan-2-amine (**10g**)

**Physical characteristics:** maroon paste; Yield: 0.36 g, 57 %,  $R_f$ : 0.9, hexane-ethyl acetate (80 % : 20 %);  $^1\text{H NMR}$  (400 MHz,  $\text{CDCl}_3$ )  $\delta$  6.93 (1H, t,  $J=7.6$  Hz, Ar-CH), 6.82 (1H, d,  $J=8$  Hz, Ar-CH), 6.65 (1H, t,  $J=7.2$  Hz, Ar-CH), 6.51 (1H, d,  $J=8.0$  Hz, Ar-CH), 3.86 (1H, br s, NH), 1.61 (1H, d,  $J=14.4$  Hz,  $\text{CH}_2$ ), 1.45 (3H, s,  $\text{CH}_3$ ), 1.37 (1H, m,  $\text{CH}_2$ ), 1.22 (3H, s,  $\text{CH}_3$ ), 0.86 (9H, s,  $(\text{CH}_3)_3$ );  $^{13}\text{C NMR}$  (101 MHz,  $\text{CDCl}_3$ )  $\delta$  164.9 (C-10), 140.9 (Ar-C), 1.38-1.36 (Ar-C), 129.3 (Ar-CH), 126.7 (Ar-CH), 118.9 (Ar-CH), 116.4 (Ar-CH), 59.6, 57.4 ( $\text{CH}_2$ ), 31.8 ( $3\text{CH}_3$ ), 30.9 ( $(\text{CH}_3)_3$ ), 30.1 ( $2\text{CH}_3$ ); **FT-IR**  $\nu_{\text{max}}/\text{cm}^{-1}$ : 3675, 3256, 2986, 2969, 2901, 1687, 1599; **HRMS (ESI-TOF)**  $m/z$ :  $[\text{M}+\text{H}]^+$  Calculated for  $\text{C}_{21}\text{H}_{34}\text{N}_3^+$  328.2747 and 339.2747 -D (11D) found isotopes 339.3413.

***N*-(2,2,4-trimethyl-2,3,4,5-tetrahydro-1,4-methanobenzo-1,5-diazepin-10-ylidene)cyclohexanamine (10h)**

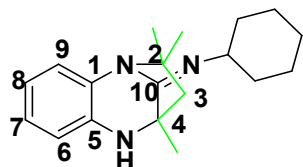

*1H*-Benzo[*d*]imidazol-2(3*H*)-one (**6a**) (0.25 g, 1.87 mmol), cyclohexyl isocyanide (**2b**) (0.21 g, 1.87 mmol) and acetone- $\text{D}_6$  (**3c**) (0.24 g, 3.74 mmol, 0.31 ml) were reacted to give *N*-(2,2,4-trimethyl-2,3,4,5-tetrahydro-1,4-methanobenzo-1,5-diazepin-10-ylidene)cyclohexanamine (**10h**): **Physical characteristics:** yellow crystalline solid; Yield: 0.35 g, 61 %, **Mp**: 115-118,  $R_f$ : 0.5, hexane-ethyl acetate (80 % : 20 %);  $^1\text{H NMR}$  (400 MHz,  $\text{CDCl}_3$ )  $\delta$  6.95 (1H, t,  $J=7.6$  Hz, Ar-CH), 6.87 (1H, d,  $J=7.6$  Hz, Ar-CH), 6.66 (1H, t,  $J=7.2$  Hz, Ar-CH), 6.52 (1H, d,  $J=8.0$  Hz, Ar-CH), 4.03 (1H, s, CH), 3.87 (1H, br s, NH), 1.79-1.69 (6H, m, cyclohexyl) 1.44-1.33 (2H, m, cyclohexyl), 1.21-1.01 (2H, m, cyclohexyl),  $^{13}\text{C NMR}$  (101 MHz,  $\text{CDCl}_3$ )  $\delta$  151.5 (C-10), 140.8 (Ar-C), 136.8 (Ar-C), 128.9 (Ar-CH), 126.9 (Ar-CH), 118.9 (Ar-CH), 116.1 (Ar-CH), 58.7 (CH), 33.9 ( $\text{CH}_2$ ), 33.6 ( $\text{CH}_2$ ), 29.9 ( $\text{CH}_2$ ), 25.9 ( $\text{CH}_2$ ), 25.1 ( $\text{CH}_2$ ); **FT-IR**  $\nu_{\text{max}}/\text{cm}^{-1}$ : 3263, 2963, 2924, 2855, 1699, 1610; **HRMS (ESI-TOF)**  $m/z$ :  $[\text{M}+\text{H}]^+$  Calculated for  $\text{C}_{19}\text{H}_{28}\text{N}_3^+$  298.2278 and 309.2278-D (11-D) found isotopes 309.2884.

**General method for the synthesis of *N*-,3,3-Dimethyl-3,4-dihydroquinoxalin-2(1*H*)-ylidene)-2-methylpropan-2-amine derivatives using Acetone- $\text{d}_6$  (11j-k) (Green-deuterated-atoms)**

In a round-bottomed flask equipped with a magnetic stirrer bar, a mixture of *1H*-Benzo[*d*]imidazol-2(3*H*)-one derivatives (**6a**) or **6c**, isocyanide derivative (**2a-b**) and 2 equivalents of acetone- $\text{d}_6$  (**3c**) was stirred at room temperature (rt) for 24 h, while being monitored by TLC. The solvent was removed under reduced pressure and the residue was purified by silica gel column chromatography using hexane-ethyl acetate as eluent to obtain the product.

***N*-(tert-butyl)-3,3-dimethyl-3,4-dihydroquinoxalin-2-amine (11i)**

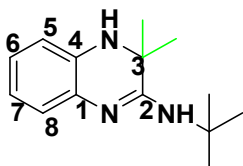

*1H*-Benzo[*d*]imidazol-2(3*H*)-one (**6a**) (0.25 g, 1.87 mmol), *tert*-butyl isocyanide (**2a**) (0.17 g, 1.87 mmol) and acetone- $\text{D}_6$  (**3c**) (0.24 g, 3.74 mmol, 0.31 ml) were reacted to give *N*-(*tert*-butyl)-3,3-dimethyl-3,4-dihydroquinoxalin-2-amine (**11i**): **Physical characteristics:** white solid; Yield: 0.43 g, 70 %; **Mp**: 86-88°C,  $R_f$ : 0.8, hexane-ethyl acetate (80 % : 20 %);  $^1\text{H NMR}$  (400 MHz,  $\text{CDCl}_3$ )  $\delta$  7.04 (1H, d,  $J=7.2$  Hz, Ar-H), 6.81-6.75 (2H, m, Ar-H), 6.53 (1H, d,  $J=7.2$  Hz, Ar-H), 4.19 (1H, br s, NH), 3.43 (1H, br s, NH), 1.47 (9H, s,  $(\text{CH}_3)_3$ ),  $^{13}\text{C NMR}$  (101 MHz,  $\text{CDCl}_3$ )  $\delta$  157.6 (C-2), 135.6 (Ar-C), 134.9 (Ar-C), 124.1 (Ar-CH), 122.7 (Ar-CH), 119.6 (Ar-CH), 113.6 (Ar-CH), 51.7, 29.1 ( $(\text{CH}_3)_3$ ); **FT-IR**  $\nu_{\text{max}}/\text{cm}^{-1}$ : 3438, 3371, 3261, 3047, 2953, 1697, 1617, 1582; **HRMS (ESI-TOF)**  $m/z$ :  $[\text{M}+\text{H}]^+$  Calculated  $\text{C}_{14}\text{H}_{22}\text{N}_3^+$  232.1808 and 238.1808 (6-D) found isotope 238.2188.

***N*-(tert-butyl)-6,7-Dichloro-3,3-dimethyl-3,4-dihydroquinoxalin-2-amine (11j)**

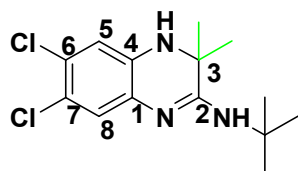

5,6-Dichloro-1*H*-benzo[*d*]imidazol-2(3*H*)-one (**6c**) (0.25 g, 1.28 mmol), *tert*-butyl isocyanide (**2a**) (0.17 g, 1.28 mmol) and acetone-*D* (**3c**) (0.16 g, 2.56 mmol, 0.21 ml) were reacted to give *N*-(*tert*-butyl)-6,7-dichloro-3,3-dimethyl-3,4-dihydroquinoxalin-2-amine (**11j**): **Physical characteristics**: brown solid; Yield: 0.28 g, 72 %; **Mp**: 141-142 °C, **R<sub>f</sub>**: 0.7, hexane-ethyl acetate (80 % : 20 %); **<sup>1</sup>H NMR** (400 MHz, CDCl<sub>3</sub>) δ 7.09 (1H, s, Ar-H), 6.59 (1H, s, Ar-H), 4.31 (1H, br s, NH), 3.49 (1H, br s, NH), 1.45 (9H, s, (CH<sub>3</sub>)<sub>3</sub>), **<sup>13</sup>C NMR** (101 MHz, CDCl<sub>3</sub>) δ 158.36 (C-2), 135.6 (Ar-C), 134.6 (Ar-C), 124.9 (Ar-CH), 124.6 (Ar-C), 121.8 (Ar-C), 114.4 (Ar-CH), 52.09, 29.04 ((CH<sub>3</sub>)<sub>3</sub>); **FT-IR**  $\nu_{\max}/\text{cm}^{-1}$ : 3675, 3460, 3354, 2972, 2901, 1770, 1605, 1574; **HRMS (ESI-TOF)** *m/z*: [M+H]<sup>+</sup> Calculated for C<sub>14</sub>H<sub>20</sub>C<sub>12</sub>N<sub>3</sub><sup>+</sup> 300.1029 and 306.1029-D (6-D) found isotope 306.1372.

#### 6,7-Dichloro-3,3-dimethyl-*N*-(2,4,4-trimethylpentan-2-yl)-3,4-dihydroquinoxalin-2-amine (**11k**)

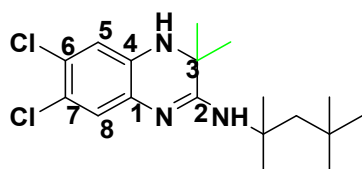

5,6-Dichloro-1*H*-benzo[*d*]imidazol-2(3*H*)-one (**6c**) (0.25 g, 1.28 mmol), 1,1,3,3-tetramethyl butyl isocyanide (**2b**) (0.18 g, 1.28 mmol) and acetone-*D* (**3c**) (0.16 g, 2.56 mmol, 0.21 ml) were reacted to give 6,7-dichloro-3,3-dimethyl-*N*-(2,4,4-trimethylpentan-2-yl)-3,4-dihydroquinoxalin-2-amine (**11k**): **Physical characteristics**: brown solid; Yield: 0.37 g, 80 %; **Mp**: 157-159 °C, **R<sub>f</sub>**: 0.7, hexane-ethyl acetate (80 % : 20 %); **<sup>1</sup>H NMR** (400 MHz, CDCl<sub>3</sub>) δ 7.08 (1H, s, Ar-H), 6.59 (1H, s, Ar-H), 4.36 (1H, br s, NH), 3.49 (1H, br s, NH), 1.87 (2H, s, CH<sub>2</sub>), 1.51 (6H, s, 2 x CH<sub>3</sub>), 1.02 (9H, s, (CH<sub>3</sub>)<sub>3</sub>), **<sup>13</sup>C NMR** (101 MHz, CDCl<sub>3</sub>) δ 168.8(C-2), 158.2 (Ar-C), 147.5 (Ar-C), 127.1 (Ar-C), 124.8 (Ar-CH), 121.0 (Ar-C), 114.4 (Ar-CH), 56.2, 52.2 (CH<sub>2</sub>), 31.9, 31.8 ((CH<sub>3</sub>)<sub>3</sub>), 29.9 (CH<sub>3</sub>), 29.22 (CH<sub>3</sub>); **FT-IR**  $\nu_{\max}/\text{cm}^{-1}$ : 3675, 3357, 2987, 2971, 2922, 1657, 1608, 1573; **HRMS (ESI-TOF)** *m/z*: [M+H]<sup>+</sup> Calculated for C<sub>18</sub>H<sub>28</sub>C<sub>12</sub>N<sub>3</sub><sup>+</sup> 356.1655 and 362.1655 (6-D) found isotope 362.2024.

#### General method for the synthesis of 2,2,4-Trimethyl-2,3-dihydro-1*H*-benzo-1,5-diazepine derivatives (**12a-b**)

In a round bottomed flask equipped with a magnetic stirrer bar, a mixture of 4,5-dimethyl-1,2-phenylenediamine (**1b**) or 4,5-dichloro-1,2-phenylenediamine (**1c**), urea and acetone (2 eq) were set for reflux for 12 h, while being monitored by TLC. After completion the reaction was cooled to room temperature. Excess acetone was removed under reduced pressure to obtain a residue that was washed with water to remove urea, then ethyl acetate to obtain the product.

#### 2,2,4,7,8-Pentamethyl-2,3-dihydro-1*H*-benzo-1,5-diazepine (**12a**)

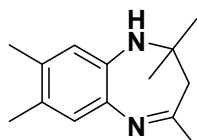

Urea (0.11 g, 1.84 mmol), 4,5-dimethyl-1,2-phenylenediamine (**1b**) (0.25 g, 1.84 mmol) and acetone (**3a**) (0.16 g, 2.82 mmol, 0.21 ml) were reacted to give 2,2,4,7,8-pentamethyl-2,3-dihydro-1*H*-benzo-1,5-diazepine (**12a**): **Physical characteristics**: brown solid; Yield: 0.39 g, 85%; **Mp**: 88-90 °C; **<sup>1</sup>H NMR** (400 MHz, DMSO-*d*<sub>6</sub>) δ 6.70 (1H, s, Ar-H), 6.59 (1H, s, Ar-H), 4.43 (1H, s, N-H); 2.19 (3H, s, CH<sub>3</sub>), 2.09 (6H, s, 2 x CH<sub>3</sub>), 1.20 (6H, s, 2 x CH<sub>3</sub>); **<sup>13</sup>C NMR** (101 MHz, DMSO-*d*<sub>6</sub>) δ 170.0 (C=N), 137.5 (Ar-C), 136.9 (Ar-C), 132.6 (Ar-C), 127.7 (Ar-C), 127.4 (Ar-CH), 122.2 (Ar-CH), 66.7, 45.3 (CH<sub>2</sub>), 29.9 (CH<sub>3</sub>), 29.4 (CH<sub>3</sub>), 18.9 (CH<sub>3</sub>), 18.5 (CH<sub>3</sub>); **FT-IR**  $\nu_{\max}/\text{cm}^{-1}$ : 3314, 2914, 1633, 1477; **HRMS (ESI-TOF)** *m/z*: [M+H]<sup>+</sup> Calculated C<sub>14</sub>H<sub>21</sub>N<sub>2</sub><sup>+</sup> 217.1699 found 217.1702.

### 7,8-Dichloro-2,2,4-trimethyl-2,3-dihydro-1H-benzo-1,5-diazepine (12b)

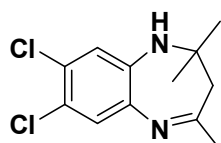

Urea (0.08 g, 1.41 mmol), 4,5-dichloro-1,2-phenylenediamine (**1c**) (0.25 g, 1.41 mmol) and acetone (**3a**) (0.16 g, 2.82 mmol, 0.21 ml) were reacted to give 7,8-dichloro-2,2,4-trimethyl-2,3-dihydro-1H-benzodiazepine (**12b**): **Physical characteristics**: purple solid; Yield: 0.29 g, 80 %; **Mp**: 113-115 °C; **<sup>1</sup>H NMR** (400 MHz, DMSO-*d*<sub>6</sub>) δ 7.09 (1H, s, Ar-H), 7.03 (1H, s, Ar-H), 5.35 (H, s, N-H), 2.26 (2H, s, CH<sub>2</sub>), 2.22 (3H, s, CH<sub>3</sub>), 1.23 (6H, 2 x CH<sub>3</sub>); **<sup>13</sup>C NMR** (101 MHz, DMSO-*d*<sub>6</sub>) δ 173.2 (C=N), 139.9 (Ar-C), 138.1 (Ar-C), 128.5 (Ar-CH), 126.4 (Ar-C), 121.1 (Ar-CH), 120.1 (Ar-C), 65.5, 45.6 (CH<sub>2</sub>), 30.1 (CH<sub>3</sub>), 29.7 (CH<sub>3</sub>); **FT-IR**  $\nu_{\max}/\text{cm}^{-1}$ : 3299, 2960, 2923, 1733, 1641; **HRMS (ESI-TOF)** m/z: [M+H]<sup>+</sup> Calculated C<sub>12</sub>H<sub>15</sub>Cl<sub>2</sub>N<sub>2</sub><sup>+</sup> 257.0607 found 257.0612.

### General procedure for the synthesis of 13a-b

In a round bottomed flask equipped with a magnetic stirrer bar, isocyanide (**2**) was added to a mixture of 2,2,4,7,8-pentamethyl-2,3-dihydro-1H-benzo-1,5-diazepine derivative (**12a**), ethanol and montmorillonite k-10 clay or *p*-toluenesulfonic acid. The reaction mixture was allowed to stir at room temperature for 24 h while being monitored by TLC. After completion, the reaction was cooled and the solvent removed under reduced pressure to obtain a crude residue, which was then purified by silica gel column chromatography using hexane-ethyl acetate as eluent, to obtain the product.

### 7,8-Dimethyl-N-(tert-butyl)-2,4,4-trimethyl-2,3,4,5-tetrahydro-1H-benzo-1,5-diazepine-2-carboxamide (13a)

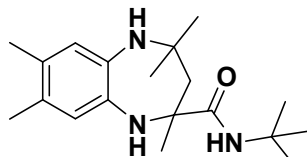

2,2,4,7,8-Pentamethyl-2,3-dihydro-1H-benzo-1,5-diazepine (**12a**) (0.10 g, 0.46 mmol), isocyanide (**2a**) (0.04 g, 0.46 mmol) and *p*-toluenesulfonic acid (0.01 g 0.46 mmol) were reacted to give 7,8-dimethyl-N-(tert-butyl)-2,4,4-trimethyl-2,3,4,5-tetrahydro-1H-benzo-1,5-diazepine-2-carboxamide (**13a**); **Physical characteristics**: yellow solid; Yield: 0.11 g, 75 %, **Mp**: 200-202, **R<sub>f</sub>**: 0.6, hexane-ethyl acetate (50 %: 50 %); **<sup>1</sup>H NMR** (400 MHz, CDCl<sub>3</sub>) δ 7.19 (1H, d, *J*= 5.2 Hz, NH-C=O), 6.39 (2H, s, Ar-H), 2.39 (1H, br s, NH), 2.15 (1H, d, *J*= 14.8 Hz, CH<sub>2</sub>), 2.07 and 2.06 (6H, 2 x s, 2 x CH<sub>3</sub>), 1.53 (1H, d, *J*= 14.8 Hz, CH<sub>2</sub>), 1.29 (3H, s, CH<sub>3</sub>), 1.25 (9H, s, (CH<sub>3</sub>)<sub>3</sub>), 1.21 (1H, br s, NH), 1.14 (3H, s, CH<sub>3</sub>), 1.06 (3H, s, CH<sub>3</sub>); **<sup>13</sup>C NMR** (101 MHz, CDCl<sub>3</sub>) δ 175.6 (C=O), 135.0 (Ar-C), 134.4 (Ar-C), 130.6 (Ar-C), 129.9 (Ar-C), 124.2 (Ar-CH), 121.3 (Ar-CH), 60.6, 52.9, 50.7, 47.5 (CH<sub>2</sub>), 32.5 (CH<sub>3</sub>), 30.9 (CH<sub>3</sub>), 29.3 (CH<sub>3</sub>), 28.7 ((CH<sub>3</sub>)<sub>3</sub>), 19.0 (CH<sub>3</sub>), 18.9 (CH<sub>3</sub>); **FT-IR**  $\nu_{\max}/\text{cm}^{-1}$ : 3380, 3286, 2926, 1642, 1591; **HRMS (ESI-TOF)** m/z: [M+H]<sup>+</sup> Calculated for C<sub>19</sub>H<sub>32</sub>N<sub>3</sub>O<sup>+</sup> 318.2540 found 318.2521.

### 7,8-dichloro-N-cyclohexyl-2,4,4-trimethyl-2,3,4,5-tetrahydro-1H-benzo-1,5-diazepine-2-carboxamide (13b)

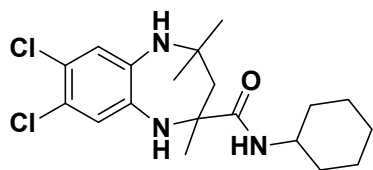

7,8-Dichloro-2,2,4-trimethyl-2,3-dihydro-1H-benzo-1,5-diazepine (**12b**) (0.14 g, 0.62 mmol), isocyanide (**2c**) (0.07 g, 0.62 mmol) and *p*-toluenesulfonic acid (0.12 g 0.62 mmol) were reacted to give 7,8-dichloro-N-

cyclohexyl-2,4,4-trimethyl-2,3,4,5-tetrahydro-1*H*-benzo-1,5-diazepine-2-carboxamide (**13b**); **Physical characteristics**: brown solid; Yield: 0.11 g, 83 %, **Mp**: 168-170 (lit.<sup>8</sup> 169-172 °C), **R<sub>f</sub>**: 0.5, hexane-ethyl acetate (50 % : 50 %); **<sup>1</sup>H NMR** (400 MHz, CDCl<sub>3</sub>) δ 7.03 (1H, d, *J*= 8.4 Hz, NH-C=O), 6.72 (1H, s, Ar-H), 6.69 (1H, s, Ar-H), 3.78-3.69 (1H, m, CH), 3.47 (1H, br s, NH), 2.82 (1H, br s, NH), 2.32 (1H, d, *J*= 14.8 Hz, CH<sub>2</sub>), 1.87-1.84 (1H, d, *J*=12Hz CH<sub>2</sub>), 1.68-1.55 (4H, m), 1.38-1.37 (5H, m), 1.32 (5H, m), 1.21-1.22 (5H, m); **<sup>13</sup>C NMR** (101 MHz, CDCl<sub>3</sub>) δ 174.4 (C=O), 137.4 (Ar-C), 135.8 (Ar-C), 125.1 (Ar-C), 123.4 (Ar-C), 123.2 (Ar-CH), 119.7 (Ar-CH), 60.6, 53.6, 48.3 (CH), 47.1 (CH<sub>2</sub>), 33.2 (CH<sub>2</sub>, cyclohexyl), 32.6 (CH<sub>2</sub>, cyclohexyl), 32.3 (CH<sub>3</sub>, ), 30.8 (CH<sub>3</sub>), 29.9 (CH<sub>3</sub>), 25.7 (CH<sub>2</sub>, cyclohexyl), 24.9 (CH<sub>2</sub>, cyclohexyl), 24.8 (CH<sub>2</sub>, cyclohexyl); **FT-IR**  $\nu_{\max}/\text{cm}^{-1}$ : 3299, 2960, 2923, 2853, 1642, 1591.

#### General method for the synthesis of 4-oxo-4,5-dihydro-1*H*-benzo-1,5-diazepine-2-carboxylates (**14a-j**)

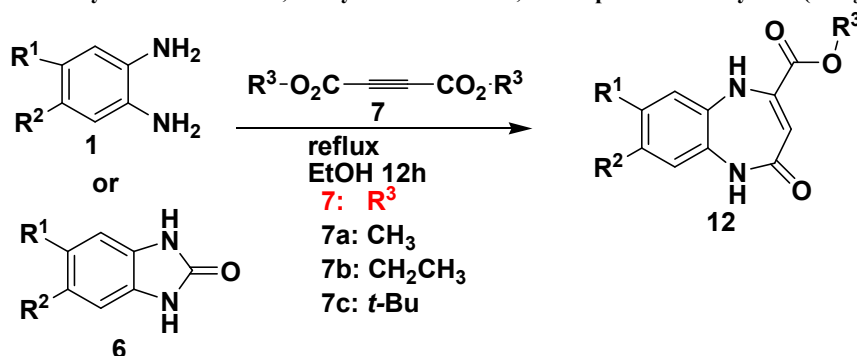

In a round-bottomed flask equipped with a magnetic stirrer bar, DMAD, DEtAD or DTAD (**7**) (1 eq) was added to 1*H*-benzo[*d*]imidazol-2(3*H*)-one derivative (**6**) or *o*-phenylenediamine derivative (**1**) in ethanol (30 ml). The reaction mixture was refluxed for 8 h while being monitored by TLC. After completion, the reaction was cooled and the solvent removed under reduced pressure to obtain a residue, which was then purified by silica gel column chromatography using hexane-ethyl acetate as eluent, to obtain the product. Alternatively, the precipitate was washed with cold ethanol and filtered to give solid product.

#### Methyl 4-oxo-4,5-dihydro-1*H*-benzo-1,5-diazepine-2-carboxylate (**14a**)

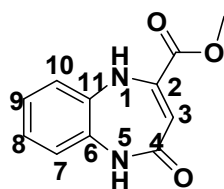

1*H*-Benzo[*d*]imidazol-2(3*H*)-one (**6a**) (0.25 g, 1.89 mmol) and dimethyl acetylenedicarboxylate (**7a**) (0.27 g, 1.89 mmol) were reacted to give Methyl 4-oxo-4,5-dihydro-1*H*-benzo-1,5-diazepine-2-carboxylate (**14a**): **Physical characteristics**: yellow solid; Yield: 0.34 g, 83 %, **Mp**: 224-226 °C, **R<sub>f</sub>**: 0.8, hexane-ethyl acetate (50 % : 50 %); **<sup>1</sup>H NMR** (400 MHz, DMSO-*d*<sub>6</sub>) δ 11.74 (1H, s, NH), 11.03 (1H, s, NH), 7.39 (1H, d, *J*= 7.2 Hz, Ar-H), 7.07-6.99 (3H, m, Ar-H), 5.52 (1H, s, H-3), 3.68 (3H, s, CH<sub>3</sub>), **<sup>13</sup>C NMR** (101 MHz, DMSO-*d*<sub>6</sub>) δ 169.3 (C=O), 155.4 (C=O), 143.9 (Ar-C), 125.0 (Ar-C), 124.7 (Ar-C), 123.3 (Ar-CH), 122.4 (Ar-CH), 115.2 (Ar-CH), 115.1 (Ar-CH), 83.4 (C-3), 50.5; **FT-IR**  $\nu_{\max}/\text{cm}^{-1}$ : 3215, 2902, 1686, 1614, 1501, 1598, 1429; **HRMS (ESI-TOF)** *m/z*: [M+H]<sup>+</sup> Calculated for C<sub>11</sub>H<sub>11</sub>N<sub>2</sub>O<sub>3</sub><sup>+</sup> 219.0764 found 219.0752.

#### Ethyl 4-oxo-4,5-dihydro-1*H*-benzo-1,5-diazepine-2-carboxylate (**14b**)



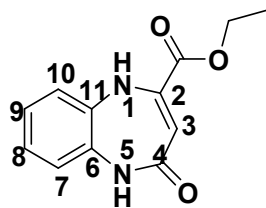

*1H*-Benzo[*d*]imidazol-2(3*H*)-one (**6a**) (0.25 g, 1.89 mmol) and diethyl acetylenedicarboxylate (**7b**) (0.32 g, 1.89 mmol) were reacted to give Ethyl 4-oxo-4,5-dihydro-1*H*-benzo-1,5-diazepine-2-carboxylate (**14b**): **Physical characteristics**: yellow solid; Yield: 0.34 g, 79 %, **Mp**: 209-211 °C, **R<sub>f</sub>**: 0.9, hexane-ethyl acetate (50 % : 50 %) ; **<sup>1</sup>H NMR** (400 MHz, DMSO-*d*<sub>6</sub>) δ 11.74 (1H, s, NH), 11.05 (1H, s, NH), 7.39 (1H, d, *J* = 7.2 Hz, Ar-H), 7.08-7.00 (3H, m, Ar-H), 5.49 (1H, s, H-3), 4.15 (2H, q, *J* = 7.2 Hz, CH<sub>2</sub>), 1.24 (3H, t, *J* = 6.8 Hz, CH<sub>3</sub>), **<sup>13</sup>C NMR** (101 MHz, DMSO-*d*<sub>6</sub>) δ 169.1 (C=O), 155.5 (C=O), 143.9 (Ar-C), 125.1 (Ar-C), 124.8 (Ar-C), 123.4 (Ar-CH), 122.5 (Ar-CH), 115.4 (Ar-CH), 115.2 (Ar-CH), 83.7 (C-3), 59.1 (CH<sub>2</sub>), 14.3 (CH<sub>3</sub>); **FT-IR**  $\nu_{\max}/\text{cm}^{-1}$ : 3204, 2969, 1683, 1642, 1613, 1460, 1434; **HRMS (ESI-TOF)** *m/z*: [M+H]<sup>+</sup> Calculated for C<sub>12</sub>H<sub>13</sub>N<sub>2</sub>O<sub>3</sub><sup>+</sup> 233.0921 found 233.0920.

#### Tert-butyl 4-oxo-4,5-dihydro-1*H*-benzo-1,5-diazepine-2-carboxylate (**14c**)

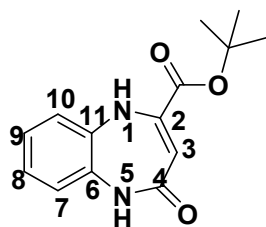

*1H*-Benzo[*d*]imidazol-2(3*H*)-one (**6a**) (0.21 g, 1.49 mmol) and di-*tert*-butyl acetylenedicarboxylate (**7c**) (0.34 g, 1.49 mmol) were reacted to give *Tert*-butyl 4-oxo-4,5-dihydro-1*H*-benzo-1,5-diazepine-2-carboxylate (**14c**): **Physical characteristics**: yellow solid; Yield: 0.29 g, 75 %, **Mp**: 210-212, **R<sub>f</sub>**: 0.9, hexane-ethyl acetate (50 % : 50 %) ; **<sup>1</sup>H NMR** (400 MHz, DMSO-*d*<sub>6</sub>) δ 11.64 (1H, s, NH), 11.97 (1H, s, NH), 7.40 (1H, d, *J* = 7.6 Hz, Ar-H), 7.05-6.99 (3H, m, Ar-H), 5.42 (1H, s, H-3), 1.48 (9H, s, ((CH<sub>3</sub>)<sub>3</sub>)) **<sup>13</sup>C NMR** (101 MHz, DMSO-*d*<sub>6</sub>) δ 169.1 (C=O), 155.7 (C=O), 143.5 (Ar-C), 125.0 (Ar-C), 124.9 (Ar-C), 123.4 (Ar-CH), 122.3 (Ar-CH), 115.3 (Ar-CH), 115.1 (Ar-CH), 95.6 (C-3), 79.2 C(CH<sub>3</sub>)<sub>3</sub>, 28.1 (CH<sub>3</sub>); **FT-IR**  $\nu_{\max}/\text{cm}^{-1}$ : 2971, 2881, 1737, 1680, 1640, 1624; **HRMS (ESI-TOF)** *m/z*: [M+H]<sup>+</sup> Calculated for C<sub>14</sub>H<sub>17</sub>N<sub>2</sub>NaO<sub>3</sub><sup>+</sup> 283.1059 found 283.1051.

#### Methyl 7-nitro-4-oxo-4,5-dihydro-1*H*-benzo-1,5-diazepine-2-carboxylate(**14d**)

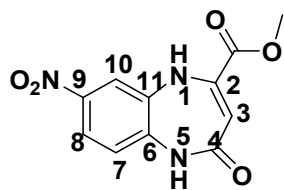

4-Nitro-*o*-phenylenediamine (**1h**) (0.25 g, 1.39 mmol) and dimethylacetylenedicarboxylate (**7a**) (0.19 g, 1.39 mmol) were reacted to give Methyl 7-nitro-4-oxo-4,5-dihydro-1*H*-benzo-1,5-diazepine-2-carboxylate (**14d**): **Physical characteristics**: yellow solid; Yield: 0.34 g, 92 %, **Mp**: 288-290, **R<sub>f</sub>**: 0.9 ; **<sup>1</sup>H NMR** (400 MHz, DMSO-*d*<sub>6</sub>) δ 12.19 (1H, NH), 11.09 (1H, NH), 8.53 (1H, s, Ar-H), 7.89-7.86 (1H, d, *J* = 8.8 Hz, Ar-H), 7.17-7.15 (1H, d, *J* = 8.8 Hz, Ar-H), 5.58 (1H, H-3), 3.71 (3H, s, CH<sub>3</sub>); **<sup>13</sup>C NMR** (101 MHz, DMSO-*d*<sub>6</sub>) δ 168.5 (C=O), 156.0 (C=O), 142.0, 142.5, 130.9, 125.5, 117.8, 115.3, 111.2, 86.0, 50.9; **FT-IR**  $\nu_{\max}/\text{cm}^{-1}$ : 3193, 3092, 2949, 1695, 1668, 1641, 1603, 1535; **HRMS (ESI-TOF)** *m/z*: [M+H]<sup>+</sup> Calculated for C<sub>11</sub>H<sub>10</sub>N<sub>3</sub>O<sub>5</sub><sup>+</sup> 264.0615 found 264.0611.

#### Ethyl 7-nitro-4-oxo-4,5-dihydro-1*H*-benzo-1,5-diazepine-2-carboxylate (**14e**)

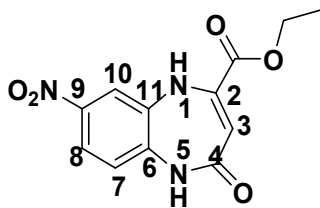

4-Nitro-*o*-phenylenediamine (**1h**) (0.25 g, 1.39 mmol) and diethyl acetylenedicarboxylate (**7b**) (0.24 g, 1.39 mmol) were reacted to give Ethyl 8-nitro-4-oxo-4,5-dihydro-1*H*-benzo-1,5-diazepine-2-carboxylate (**14e**): **Physical characteristics**: yellow solid; Yield: 0.33 g, 85 %, **Mp**: 279-281, **R<sub>f</sub>**: 0.8, hexane-ethyl acetate (50 %-50 %); **<sup>1</sup>H NMR** (400 MHz, DMSO-*d*<sub>6</sub>) δ 12.17 (1H, br s, NH), 11.13 (1H, s, NH), 8.53 (1H, s, Ar-H), 7.87 (1H, d, *J* = 8.4 Hz, Ar-H), 7.16 (1H, d, *J* = 8.8 Hz, Ar-H), 5.57 (1H, s, H-3), 4.18 (2H, q, *J* = 7.2 Hz, CH<sub>2</sub>), 1.25 (3H, t, *J* = 7.2 Hz, CH<sub>3</sub>); **<sup>13</sup>C NMR** (101 MHz, DMSO-*d*<sub>6</sub>) δ 168.3 (C=O), 156.0 (C=O), 142.7 (Ar-C), 142.6 (Ar-C), 130.9 (Ar-C), 125.5 (Ar-C), 117.8 (Ar-CH), 115.3 (Ar-CH), 111.2 (Ar-CH), 86.3 (C-3), 59.3 (CH<sub>2</sub>), 14.3 (CH<sub>3</sub>); **FT-IR**  $\nu_{\max}/\text{cm}^{-1}$ : 3187, 3136, 3084, 2904, 1695, 1633, 1602, 1530, 1493, 1487; **HRMS (ESI-TOF)** *m/z*: [M+H]<sup>+</sup> Calculated for C<sub>12</sub>H<sub>12</sub>N<sub>3</sub>O<sub>5</sub><sup>+</sup> 278.0771 found 278.0762.

#### Tert-butyl 7-nitro-4-oxo-4,5-dihydro-1*H*-benzo-1,5-diazepine-2-carboxylate (**14f**)

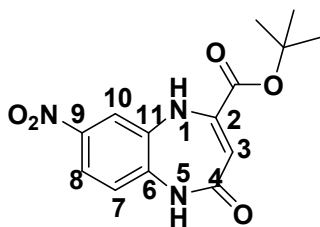

4-Nitro-*o*-phenylenediamine (**1h**) (0.20 g, 1.17 mmol) and di-*tert*-butyl acetylenedicarboxylate (**7c**) (0.25 g, 1.17 mmol) were reacted to give *Tert*-butyl 7-nitro-4-oxo-4,5-dihydro-1*H*-benzo-1,5-diazepine-2-carboxylate (**14f**): **Physical characteristics**: yellow solid; Yield: 0.28 g, 80 %, **Mp**: 208-210, **R<sub>f</sub>**: 0.5, hexane-ethyl acetate (50 % : 50 %); **<sup>1</sup>H NMR** (400 MHz, DMSO-*d*<sub>6</sub>) δ 12.08 (1H, s, NH), 11.10 (1H, s, NH), 8.55 (1H, s, Ar-H), 7.86 (1H, d, *J* = 8.8 Hz, Ar-H), 7.15 (1H, d, *J* = 8.8 Hz, Ar-H), 5.51 (1H, s, H-3), 1.49 (9H, s, ((CH<sub>3</sub>)<sub>3</sub>), **<sup>13</sup>C NMR** (101 MHz, DMSO-*d*<sub>6</sub>) δ 168.2 (C=O), 156.1 (C=O), 142.7 (Ar-C), 142.1 (Ar-C), 130.9 (Ar-C), 125.7 (Ar-C), 117.7 (Ar-CH), 115.3 (Ar-CH), 111.1 (Ar-CH), 88.1 (C-3), 79.5 C(CH<sub>3</sub>)<sub>3</sub>, 28.0 (CH<sub>3</sub>); **FT-IR**  $\nu_{\max}/\text{cm}^{-1}$ : 2975, 1690, 1616, 1541; **HRMS (ESI-TOF)** *m/z*: [M+Na]<sup>+</sup> Calculated for C<sub>14</sub>H<sub>16</sub>N<sub>3</sub>NaO<sub>5</sub><sup>+</sup> 328.0909 found 328.1013.

#### Methyl 7,8-dichloro-4-oxo-4,5-dihydro-1*H*-benzo-1,5-diazepine-2-carboxylate (**14g**)

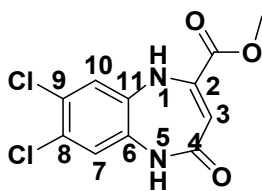

5,6-Dichloro-1*H*-benzo[*d*]imidazol-2(3*H*)-one (**6c**) (0.25 g, 1.24 mmol) and dimethyl acetylenedicarboxylate (**7a**) (0.18 g, 1.24 mmol) were reacted to give Methyl 7,8-dichloro-4-oxo-4,5-dihydro-1*H*-benzo-1,5-diazepine-2-carboxylate (**14g**): **Physical characteristics**: grey solid; Yield: 0.29 g, 83 %, **Mp**: 270-272, **R<sub>f</sub>**: 0.5, hexane-ethyl acetate (50 % : 50 %); **<sup>1</sup>H NMR** (400 MHz, DMSO-*d*<sub>6</sub>) δ 11.84 (1H, s, NH), 10.97 (1H, s, NH), 7.88 (1H, s, Ar-H), 7.15 (1H, s, Ar-H), 5.56 (1H, s, H-3), 3.69 (3H, s, CH<sub>3</sub>), **<sup>13</sup>C NMR** (101 MHz, DMSO-*d*<sub>6</sub>) δ 168.9 (C=O), 155.5 (C=O), 142.8 (Ar-C), 125.5 (Ar-C), 125.4 (Ar-C), 124.8 (Ar-C), 123.5 (Ar-C), 116.9 (Ar-CH), 115.9 (Ar-CH), 85.6 (C-3), 50.9 (CH<sub>3</sub>); **FT-IR**  $\nu_{\max}/\text{cm}^{-1}$ : 2991, 1688, 1622, 1500; **HRMS (ESI-TOF)** *m/z*: [M+H]<sup>+</sup> Calculated for C<sub>11</sub>H<sub>9</sub>Cl<sub>2</sub>N<sub>2</sub>O<sub>3</sub><sup>+</sup> 286.9985 found 286.9982.

#### Ethyl 7,8-dichloro-4-oxo-4,5-dihydro-1*H*-benzo-1,5-diazepine-2-carboxylate (**14h**)

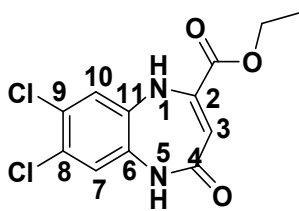

5,6-Dichloro-1*H*-benzo[*d*]imidazol-2(3*H*)-one (**6c**) (0.20 g, 1.24 mmol) and diethyl acetylenedicarboxylate (**7b**) (0.21 g, 1.24 mmol) were reacted to give ethyl 7,8-dichloro-4-oxo-4,5-dihydro-1*H*-benzo-1,5-diazepine-2-carboxylate (**14h**): **Physical characteristics**: green solid; Yield: 0.28 g, 76 %, **Mp**: 265-267, **R<sub>f</sub>**: 0.9, hexane-ethyl acetate (50 % : 50 %); **<sup>1</sup>H NMR** (400 MHz, DMSO-*d*<sub>6</sub>) δ 11.81 (1H, s, NH), 10.99 (1H, s, NH), 7.85 (1H, s, Ar-H), 7.14 (1H, s, Ar-H), 5.54 (1H, s, H-3), 4.15 (2H, q, *J* = 6.8 Hz, CH<sub>2</sub>) 1.24 (3H, t, *J* = 6.8 Hz, CH<sub>3</sub>), **<sup>13</sup>C NMR** (101 MHz, DMSO-*d*<sub>6</sub>) δ 168.6 (C=O), 155.5 (C=O), 142.8 (Ar-C), 125.5 (Ar-C), 125.4 (Ar-C), 124.8 (Ar-C), 123.4 (Ar-C), 116.9 (Ar-CH), 115.9 (Ar-CH), 85.9 (C-3), 59.4 (CH<sub>2</sub>), 14.3 (CH<sub>3</sub>); **FT-IR**  $\nu_{\max}/\text{cm}^{-1}$ : 3182, 3072, 1693, 1650, 1625, 1615; **HRMS (ESI-TOF)** *m/z*: [M+H]<sup>+</sup> Calculated for C<sub>12</sub>H<sub>11</sub>Cl<sub>2</sub>N<sub>2</sub>O<sub>3</sub><sup>+</sup> 301.0141 found 301.0139.

#### Tert-butyl 7,8-dichloro-4-oxo-4,5-dihydro-1*H*-benzo-1,5-diazepine-2-carboxylate (**14i**)

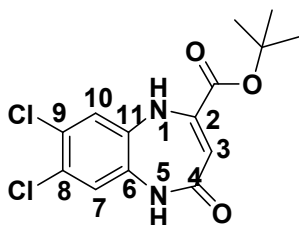

5,6-Dichloro-1*H*-benzo[*d*]imidazol-2(3*H*)-one (**6c**) (0.20 g, 0.99 mmol) and dimethyl acetylenedicarboxylate (**7c**) (0.22 g, 0.99 mmol) were reacted to give *tert*-butyl 7,8-dichloro-4-oxo-4,5-dihydro-1*H*-benzo-1,5-diazepine-2-carboxylate (**14i**): **Physical characteristics**: green solid; Yield: 0.29 g, 75 %, **Mp**: 216-218, **R<sub>f</sub>**: 0.9, hexane-ethyl acetate (50 % : 50 %); **<sup>1</sup>H NMR** (400 MHz, DMSO-*d*<sub>6</sub>) δ 11.73 (1H, s, NH), 10.95 (1H, s, NH), 7.87 (1H, s, Ar-H), 7.14 (1H, s, Ar-H), 5.48 (1H, s, H-3), 1.48 (9H, s, (CH<sub>3</sub>)<sub>3</sub>), **<sup>13</sup>C NMR** (101 MHz, DMSO-*d*<sub>6</sub>) δ 168.5 (C=O), 155.5 (C=O), 142.3 (Ar-C), 125.5 (Ar-C), 125.4 (Ar-C), 124.7 (Ar-C), 123.2 (Ar-C), 116.8 (Ar-CH), 115.8 (Ar-CH), 87.8 (C-3), 79.5 (C(CH<sub>3</sub>)<sub>3</sub>), 28.0 (CH<sub>3</sub>); **FT-IR**  $\nu_{\max}/\text{cm}^{-1}$ : 3226, 2970, 1693, 1653, 1626; **HRMS (ESI-TOF)** *m/z*: [M+Na]<sup>+</sup> Calculated for C<sub>14</sub>H<sub>15</sub>Cl<sub>2</sub>N<sub>2</sub>NaO<sub>3</sub><sup>+</sup> 351.0454 found 351.0366.

#### Methyl 7,8-dimethyl-4-oxo-4,5-dihydro-1*H*-benzo-1,5-diazepine-2-carboxylate (**14j**)

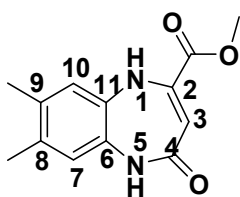

5,6-Dimethyl-1*H*-benzo[*d*]imidazol-2(3*H*)-one (**6b**) (0.25 g, 1.54 mmol) and dimethyl acetylenedicarboxylate (**7a**) (0.22 g, 1.54 mmol) were reacted to give Methyl 7,8-dimethyl-4-oxo-4,5-dihydro-1*H*-benzo-1,5-diazepine-2-carboxylate (**14j**): **Physical characteristics**: yellow solid; Yield: 0.23 g, 62 %, **Mp**: 225-227, **R<sub>f</sub>**: 0.9, hexane-ethyl acetate (50 % : 50 %); **<sup>1</sup>H NMR** (400 MHz, DMSO-*d*<sub>6</sub>) δ 11.67 (1H, s, NH), 10.98 (1H, s, NH), 7.17 (1H, s, Ar-H), 6.82 (1H, s, Ar-H), 5.46 (1H, s, H-3), 3.67 (3H, s, CH<sub>3</sub>), 2.16 (6H, s, 2 x CH<sub>3</sub>) **<sup>13</sup>C NMR** (101 MHz, DMSO-*d*<sub>6</sub>) δ 169.7 (C=O), 155.6 (C=O), 144.2 (Ar-C), 131.7 (Ar-C), 130.9 (Ar-C), 122.9 (Ar-C), 122.6 (Ar-C), 116.1 (Ar-CH), 115.9 (Ar-CH), 82.6 (C-3), 50.7 (CH<sub>3</sub>-O), 19.0 (CH<sub>3</sub>); **FT-IR**  $\nu_{\max}/\text{cm}^{-1}$ : 2948, 1679, 1615, 1508; **HRMS (ESI-TOF)** *m/z*: [M+H]<sup>+</sup> Calculated for C<sub>13</sub>H<sub>15</sub>N<sub>2</sub>O<sub>3</sub><sup>+</sup> 247.1077 found 247.1075.

#### X-ray crystallographic data

Intensity data of crystals of **10a**, **10e**, **11f** and **11g** were collected on a Bruker Apex-II CCD area detector diffractometer with graphite monochromated Mo K $\alpha$  radiation (50kV, 30mA). The collection method involved  $\omega$ - and  $\phi$ -scans of width 0.5° and 1024x1024 bit data frames. Using *Olex2*,<sup>[10]</sup> the crystal structures were solved by with the *ShelXT*<sup>[11]</sup> structure solution program using Intrinsic Phasing and refined with the *ShelXL*<sup>[12]</sup> refinement package using Least Squares minimization. Non-hydrogen atoms were first refined isotropically followed by anisotropic refinement by full matrix

| Crystal data                                                 | 10a                                                                             | 10e                                                                             | 11f                                                                                | 11g                                                                                |
|--------------------------------------------------------------|---------------------------------------------------------------------------------|---------------------------------------------------------------------------------|------------------------------------------------------------------------------------|------------------------------------------------------------------------------------|
| CCDC                                                         | 2087921                                                                         | 2087922                                                                         | 2087923                                                                            | 2087924                                                                            |
| Empirical formula                                            | C <sub>17</sub> H <sub>25</sub> N <sub>3</sub>                                  | C <sub>19</sub> H <sub>29</sub> N <sub>3</sub>                                  | C <sub>14</sub> H <sub>19</sub> Cl <sub>2</sub> N <sub>3</sub>                     | C <sub>18</sub> H <sub>27</sub> Cl <sub>2</sub> N <sub>3</sub>                     |
| Formula weight                                               | 271.40                                                                          | 299.45                                                                          | 300.22                                                                             | 356.32                                                                             |
| Temperature/K                                                | 173.15                                                                          | 173.15                                                                          | 173.15                                                                             | 173.15                                                                             |
| Crystal system                                               | monoclinic                                                                      | monoclinic                                                                      | orthorhombic                                                                       | orthorhombic                                                                       |
| Space group                                                  | <i>P</i> 2 <sub>1</sub> / <i>c</i>                                              | <i>P</i> 2 <sub>1</sub> / <i>n</i>                                              | <i>P</i> 2 <sub>1</sub> 2 <sub>1</sub> 2 <sub>1</sub>                              | <i>P</i> 2 <sub>1</sub> 2 <sub>1</sub> 2 <sub>1</sub>                              |
| <i>a</i> /Å                                                  | 9.7065(8)                                                                       | 12.5443(4)                                                                      | 8.4799(2)                                                                          | 8.1778(2)                                                                          |
| <i>b</i> /Å                                                  | 18.7394(15)                                                                     | 10.8032(3)                                                                      | 11.2725(3)                                                                         | 10.8600(3)                                                                         |
| <i>c</i> /Å                                                  | 8.5024(7)                                                                       | 13.1304(4)                                                                      | 16.0259(5)                                                                         | 21.2146(6)                                                                         |
| $\alpha$ /°                                                  | 90                                                                              | 90                                                                              | 90                                                                                 | 90                                                                                 |
| $\beta$ /°                                                   | 99.072(2)                                                                       | 90.6124(19)                                                                     | 90                                                                                 | 90                                                                                 |
| $\gamma$ /°                                                  | 90                                                                              | 90                                                                              | 90                                                                                 | 90                                                                                 |
| Volume/Å <sup>3</sup>                                        | 1527.2(2)                                                                       | 1779.31(9)                                                                      | 1531.91(7)                                                                         | 1884.09(9)                                                                         |
| <i>Z</i>                                                     | 4                                                                               | 4                                                                               | 4                                                                                  | 4                                                                                  |
| $\rho_{\text{calc}}$ /g/cm <sup>3</sup>                      | 1.180                                                                           | 1.118                                                                           | 1.302                                                                              | 1.256                                                                              |
| $\mu$ /mm <sup>-1</sup>                                      | 0.071                                                                           | 0.066                                                                           | 0.415                                                                              | 0.348                                                                              |
| <i>F</i> (000)                                               | 592.0                                                                           | 656.0                                                                           | 632.0                                                                              | 760.0                                                                              |
| Crystal size/mm <sup>3</sup>                                 | 0.366 × 0.343 ×<br>0.108                                                        | 0.526 × 0.295 ×<br>0.197                                                        | 0.411 × 0.321<br>× 0.134                                                           | 0.269 × 0.256 ×<br>0.196                                                           |
| Radiation                                                    | MoK $\alpha$ ( $\lambda$ = 0.71073)                                             | MoK $\alpha$ ( $\lambda$ =<br>0.71073)                                          | MoK $\alpha$ ( $\lambda$ =<br>0.71073)                                             | MoK $\alpha$ ( $\lambda$ =<br>0.71073)                                             |
| 2 $\Theta$ range for data collection/°                       | 4.25 to 56.94                                                                   | 4.466 to 56                                                                     | 4.418 to<br>56.616                                                                 | 3.84 to 55.996                                                                     |
| Index ranges                                                 | -12 ≤ <i>h</i> ≤ 12, -25 ≤ <i>k</i><br>≤ 25, -8 ≤ <i>l</i> ≤ 11                 | -16 ≤ <i>h</i> ≤ 16, -14 ≤<br><i>k</i> ≤ 14, -17 ≤ <i>l</i> ≤ 17                | -11 ≤ <i>h</i> ≤ 11, -<br>12 ≤ <i>k</i> ≤ 15, -<br>21 ≤ <i>l</i> ≤ 20              | -10 ≤ <i>h</i> ≤ 10, -<br>14 ≤ <i>k</i> ≤ 14, -28<br>≤ <i>l</i> ≤ 28               |
| Reflections collected                                        | 12390                                                                           | 28352                                                                           | 20413                                                                              | 36147                                                                              |
| Independent reflections                                      | 3843 [ <i>R</i> <sub>int</sub> = 0.0590,<br><i>R</i> <sub>sigma</sub> = 0.0869] | 4297 [ <i>R</i> <sub>int</sub> = 0.0405,<br><i>R</i> <sub>sigma</sub> = 0.0291] | 3823 [ <i>R</i> <sub>int</sub> =<br>0.0299, <i>R</i> <sub>sigma</sub><br>= 0.0247] | 4542 [ <i>R</i> <sub>int</sub> =<br>0.0462, <i>R</i> <sub>sigma</sub> =<br>0.0307] |
| Data/restraints/parameters                                   | 3843/0/191                                                                      | 4297/0/211                                                                      | 3823/0/185                                                                         | 4542/0/223                                                                         |
| Goodness-of-fit on <i>F</i> <sup>2</sup>                     | 0.825                                                                           | 1.055                                                                           | 1.045                                                                              | 1.069                                                                              |
| Final <i>R</i> indexes [ <i>I</i> ≥ 2 $\sigma$ ( <i>I</i> )] | <i>R</i> <sub>1</sub> = 0.0396, <i>wR</i> <sub>2</sub> =<br>0.0727              | <i>R</i> <sub>1</sub> = 0.0421, <i>wR</i> <sub>2</sub> =<br>0.0994              | <i>R</i> <sub>1</sub> = 0.0269,<br><i>wR</i> <sub>2</sub> = 0.0618                 | <i>R</i> <sub>1</sub> = 0.0298,<br><i>wR</i> <sub>2</sub> = 0.0665                 |
| Final <i>R</i> indexes [all data]                            | <i>R</i> <sub>1</sub> = 0.0883, <i>wR</i> <sub>2</sub> =<br>0.0817              | <i>R</i> <sub>1</sub> = 0.0617, <i>wR</i> <sub>2</sub> =<br>0.1092              | <i>R</i> <sub>1</sub> = 0.0311,<br><i>wR</i> <sub>2</sub> = 0.0638                 | <i>R</i> <sub>1</sub> = 0.0372,<br><i>wR</i> <sub>2</sub> = 0.0692                 |
| Largest diff. peak/hole / e Å <sup>-3</sup>                  | 0.17/-0.21                                                                      | 0.23/-0.19                                                                      | 0.17/-0.16                                                                         | 0.19/-0.16                                                                         |

NMR, HRMS and FTIR spectra

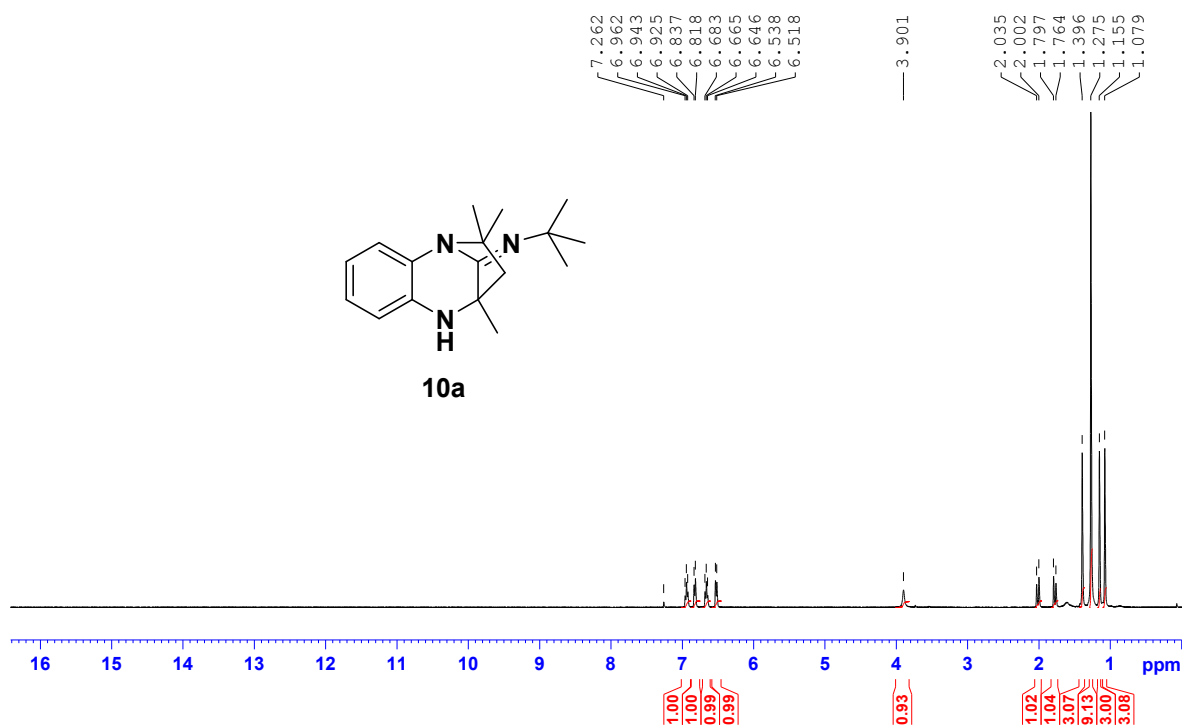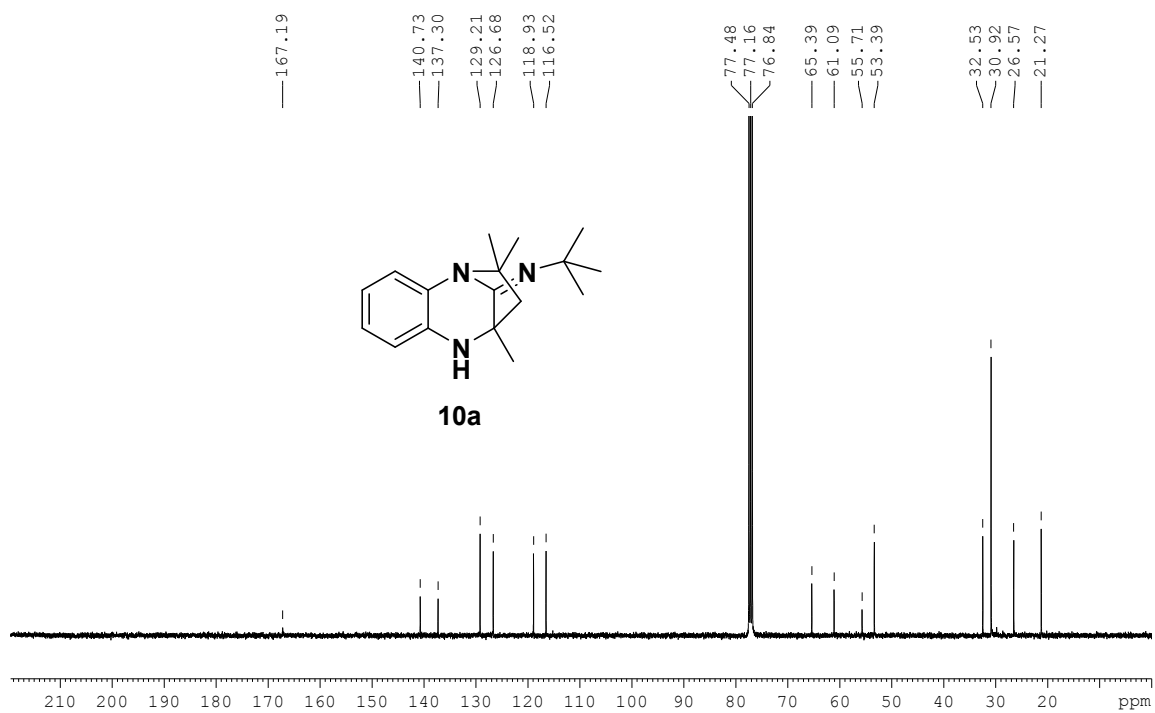

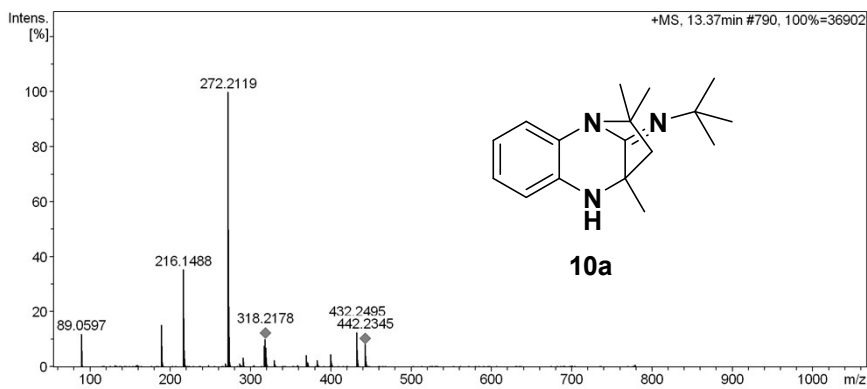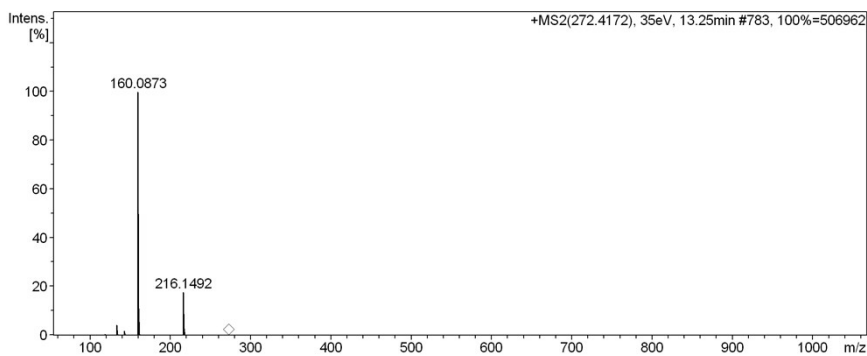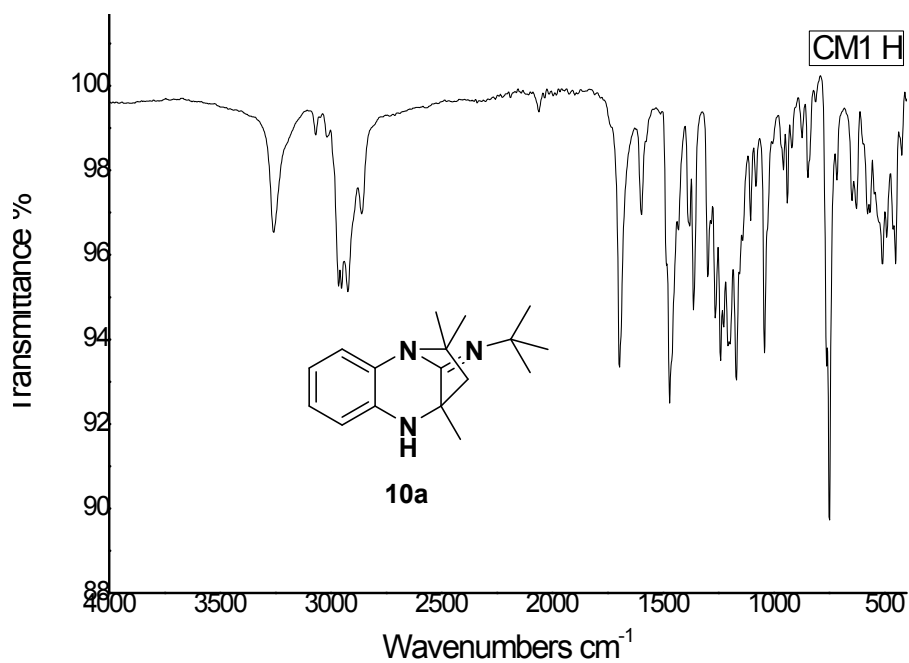

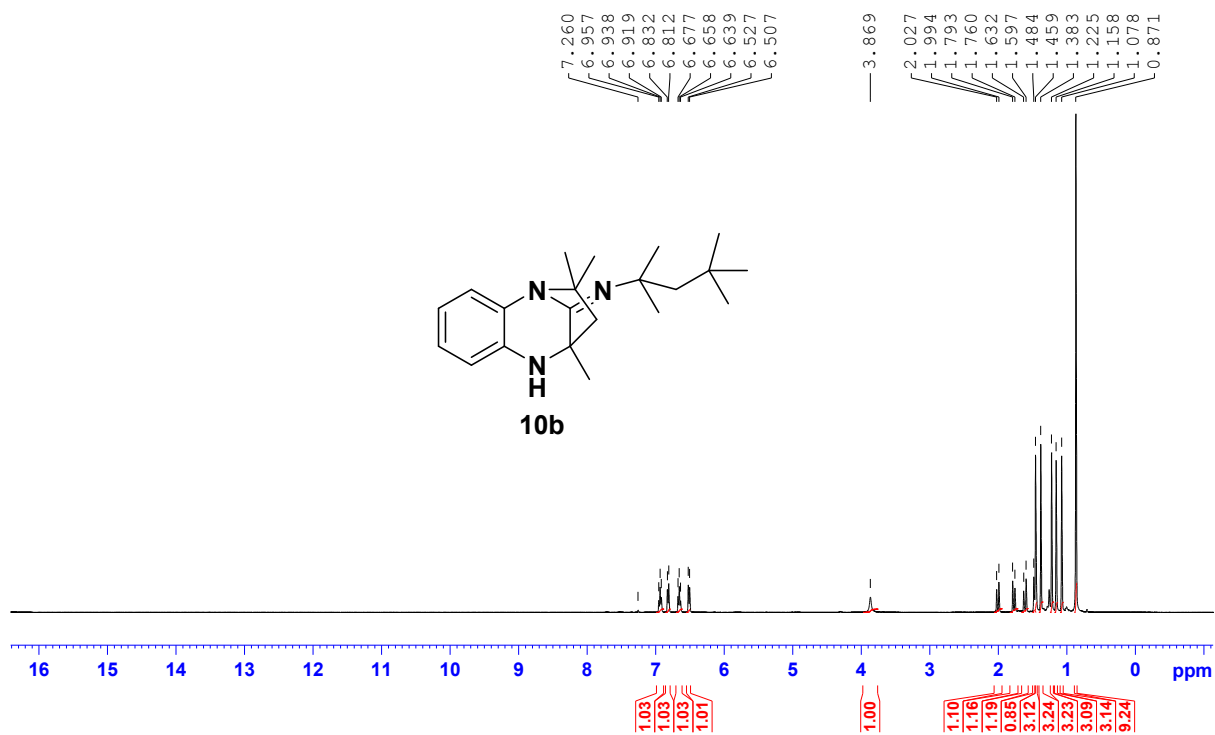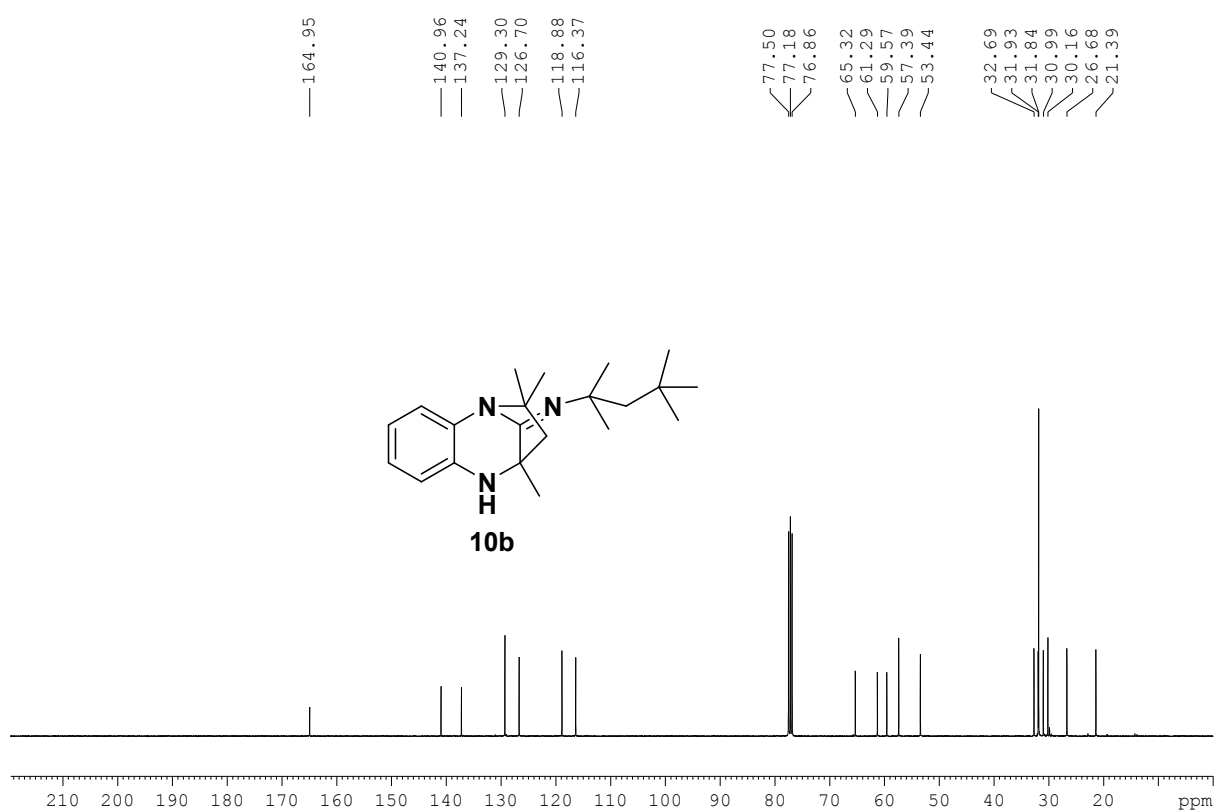

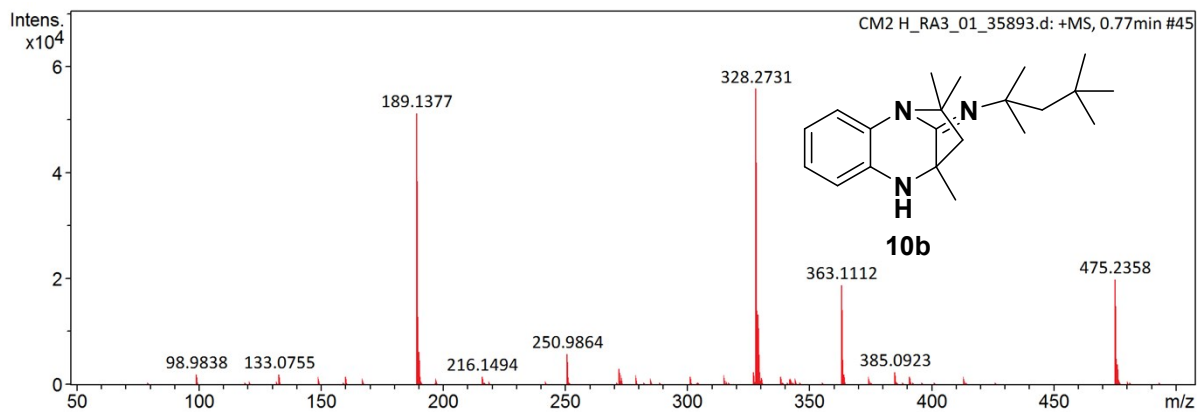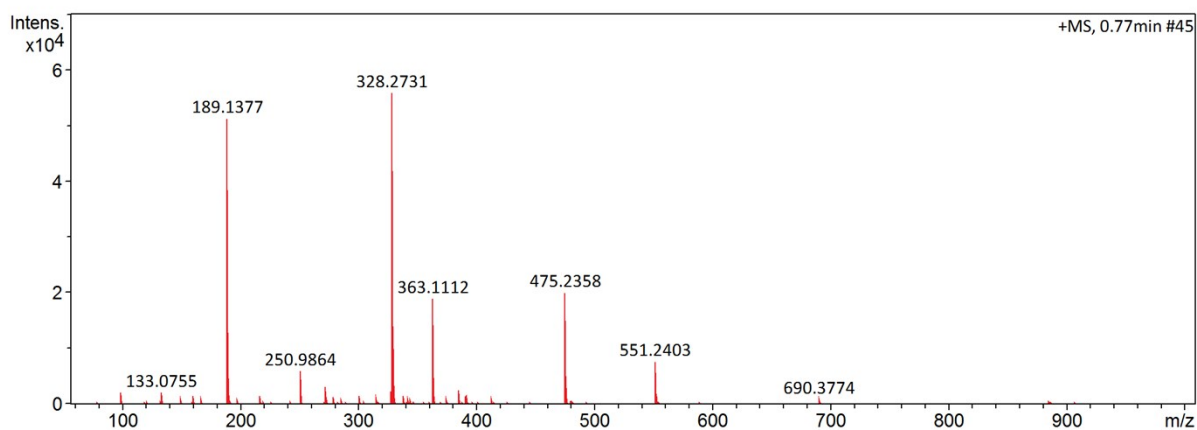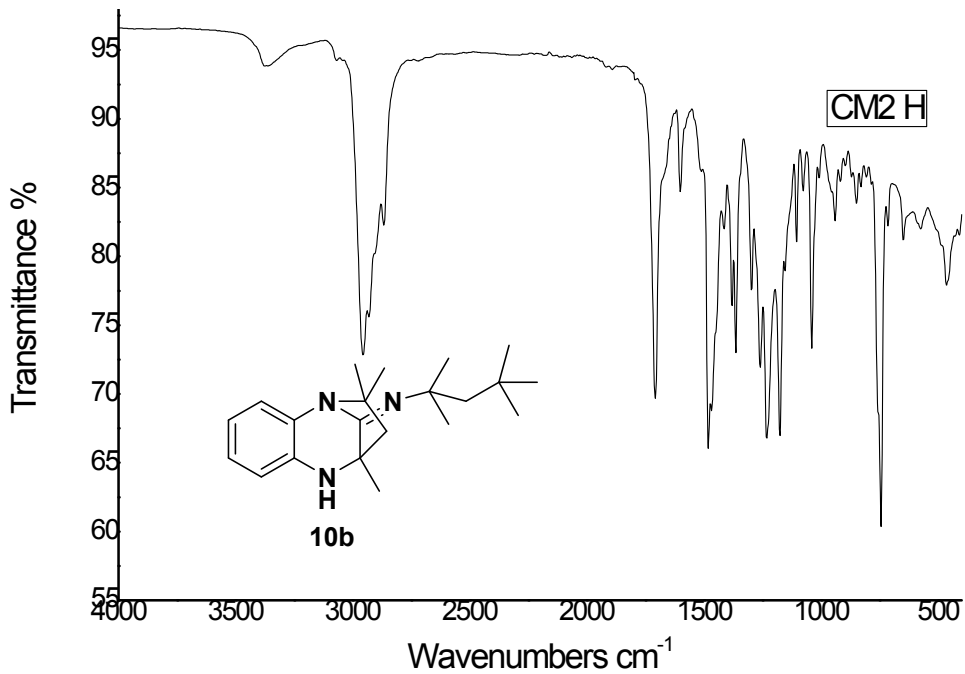



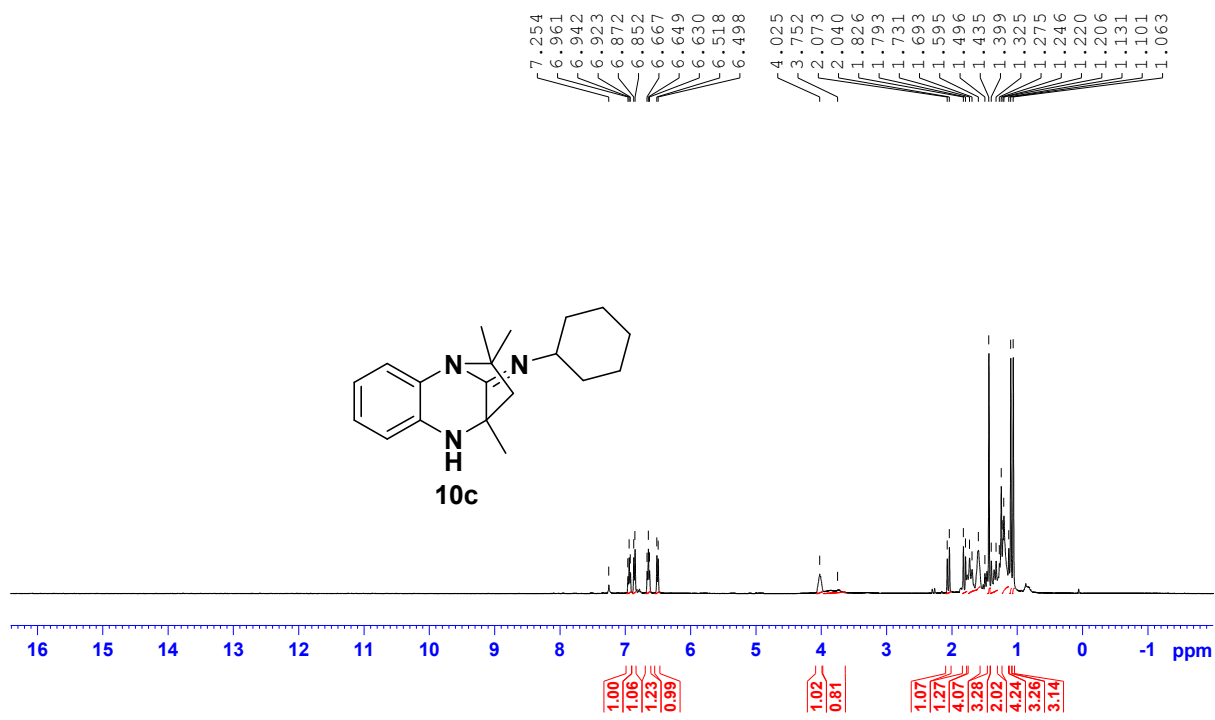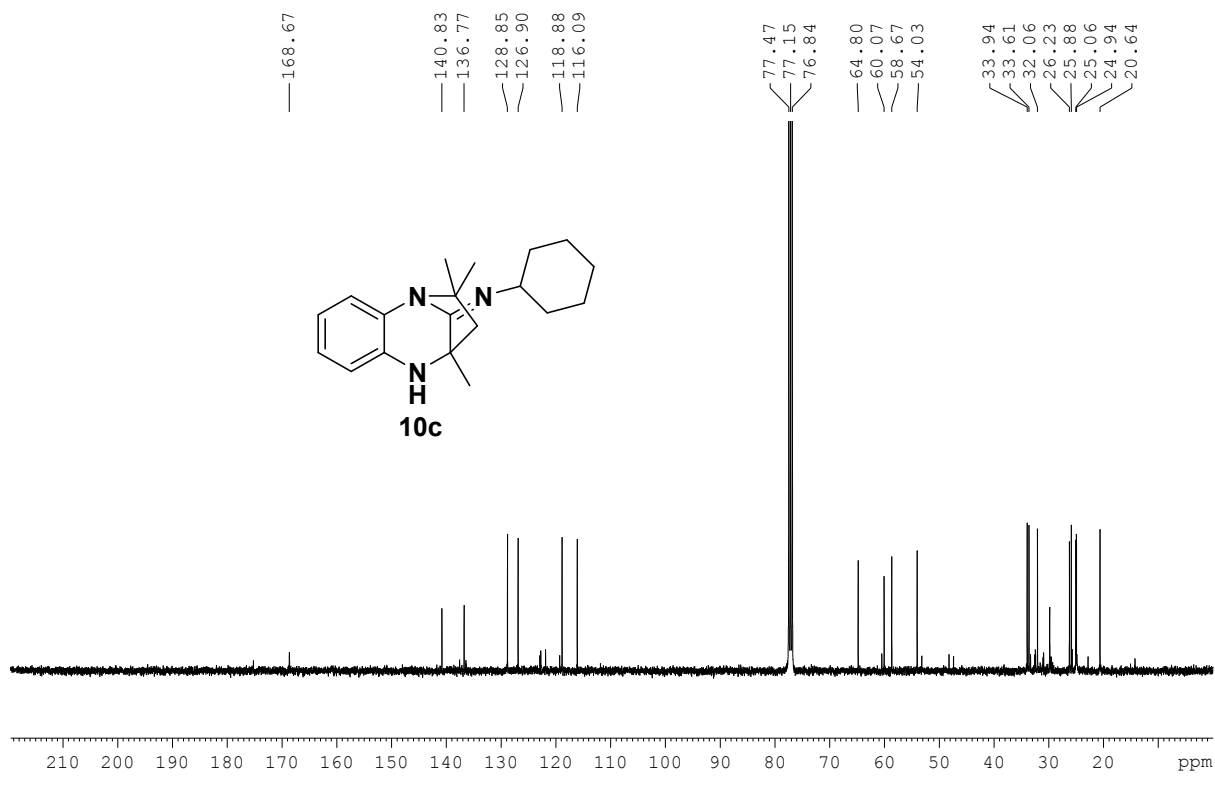

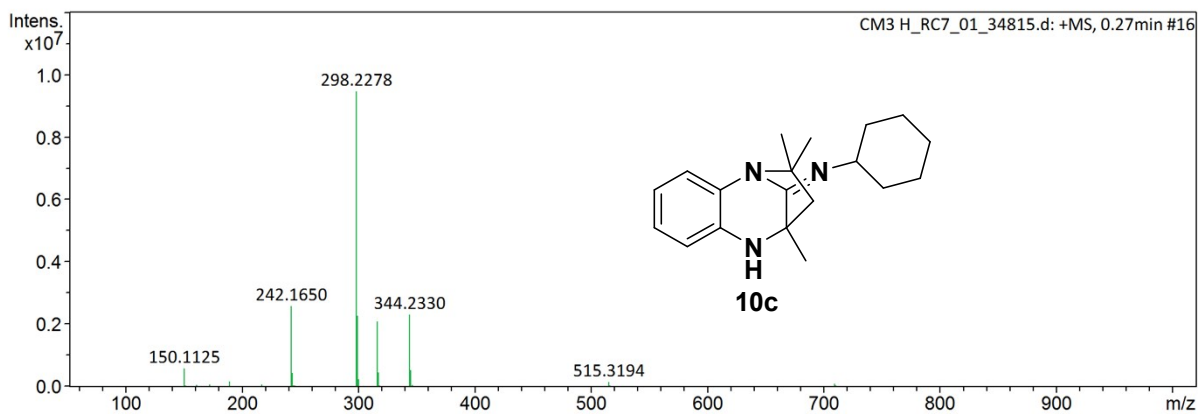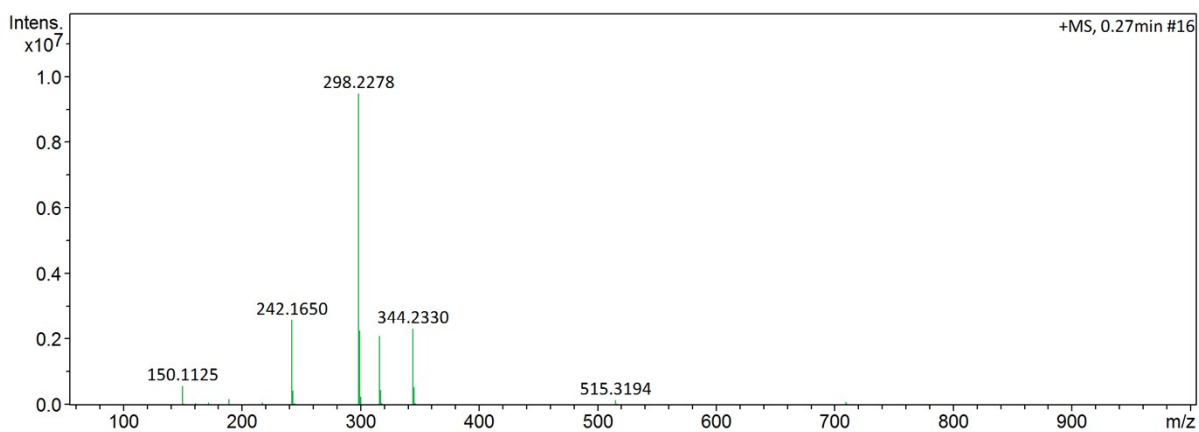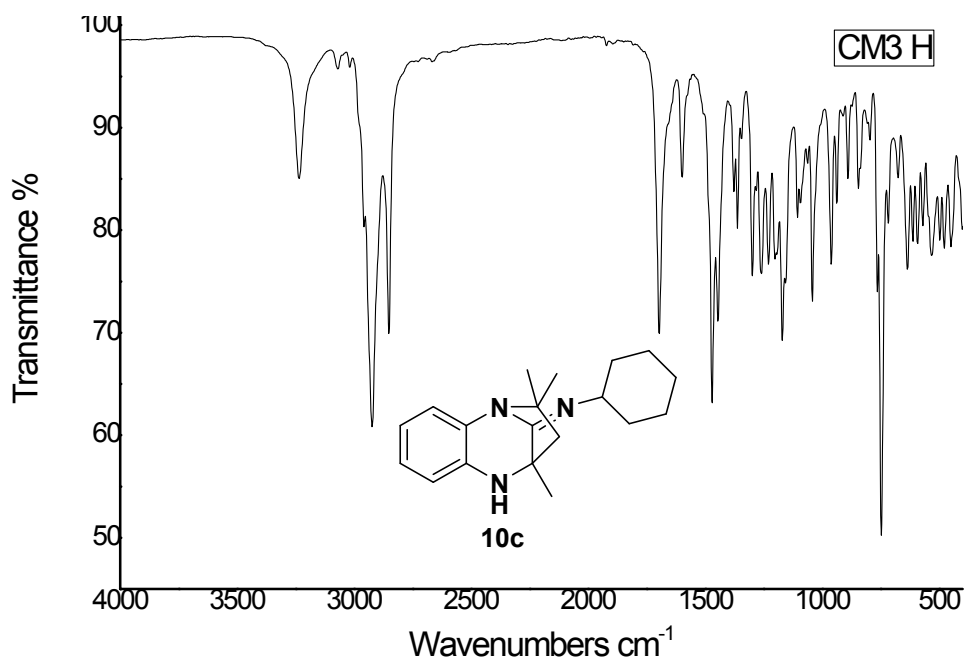

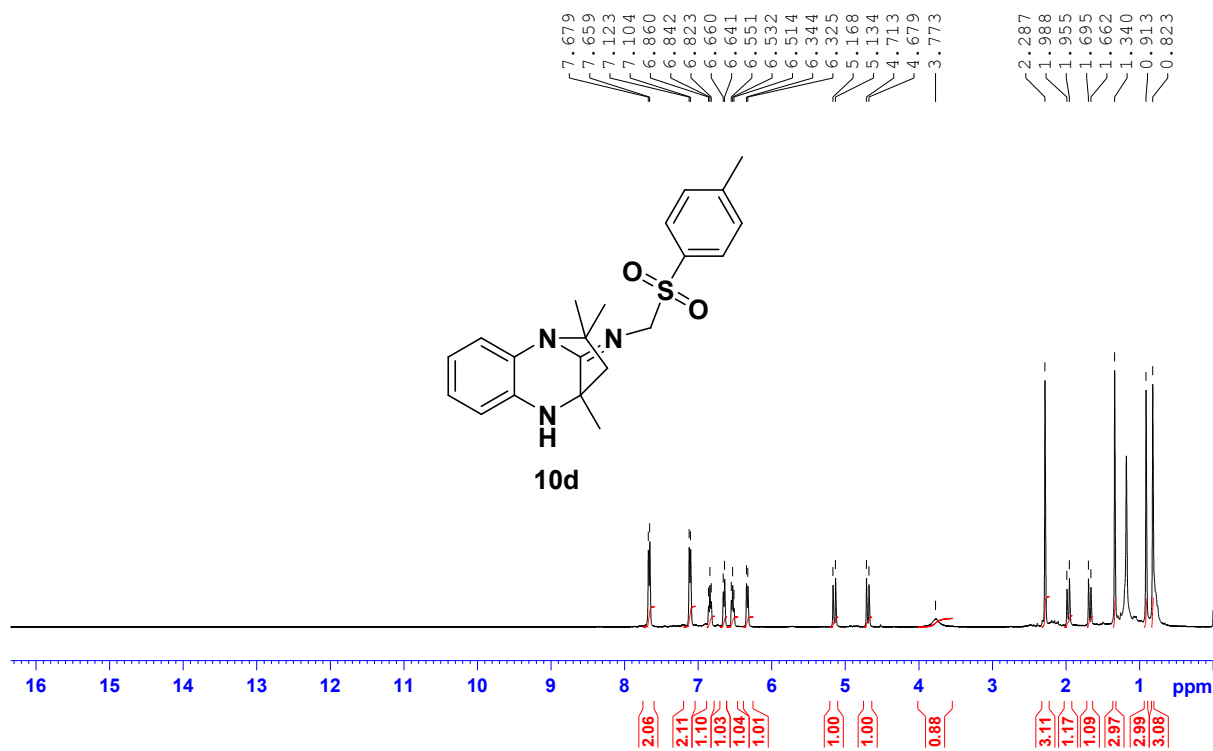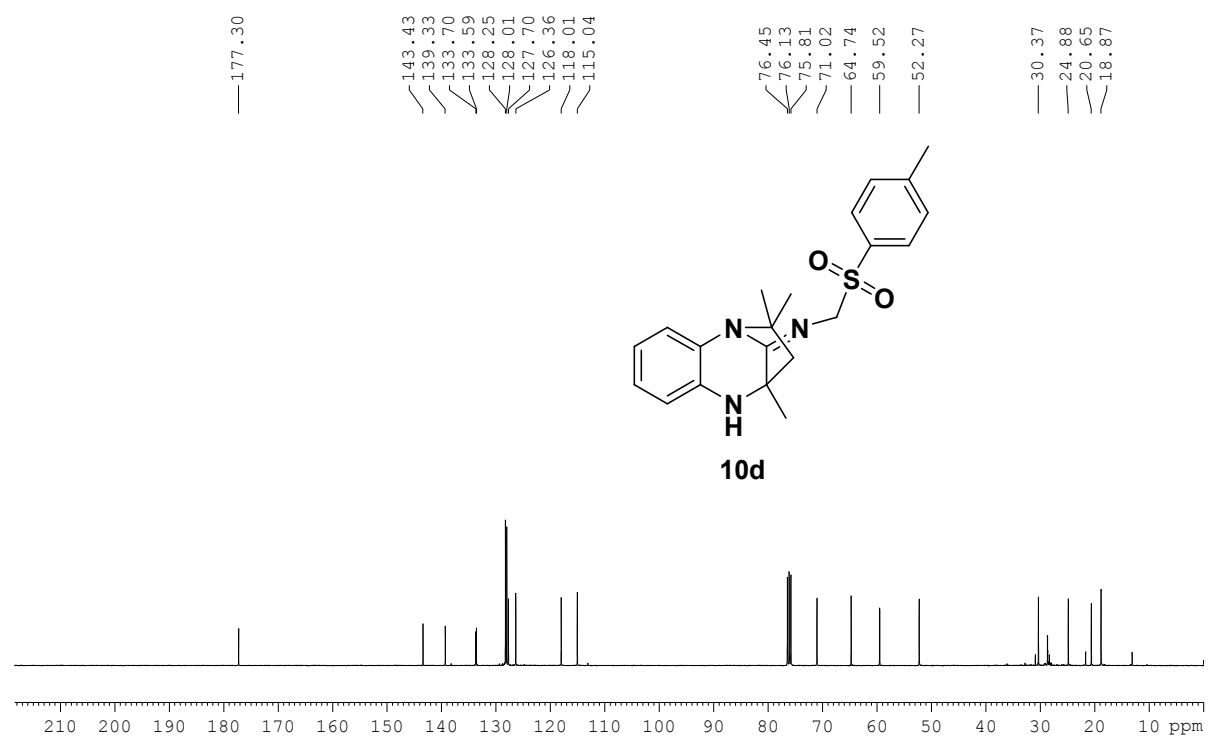

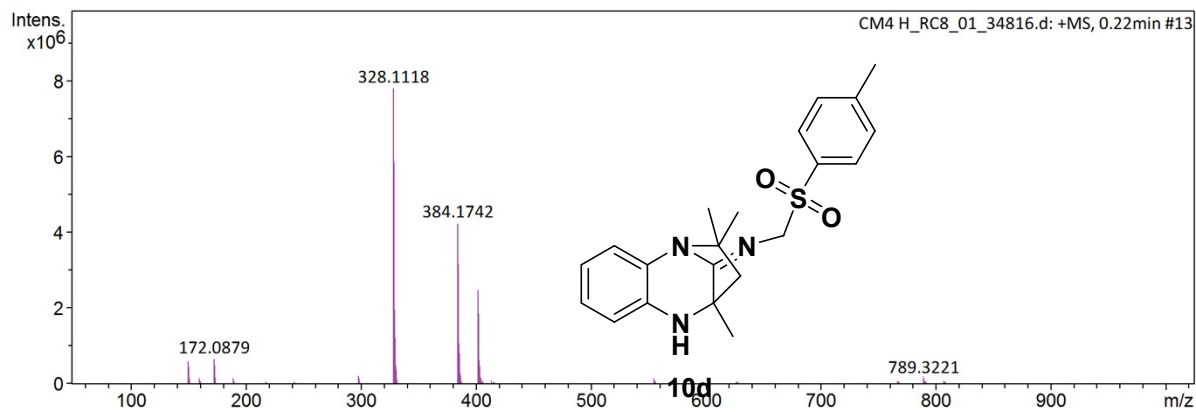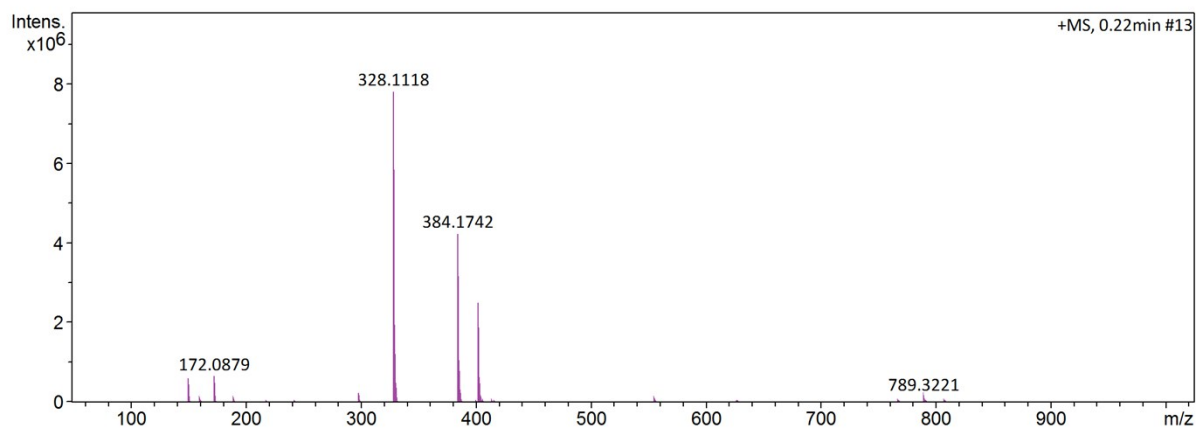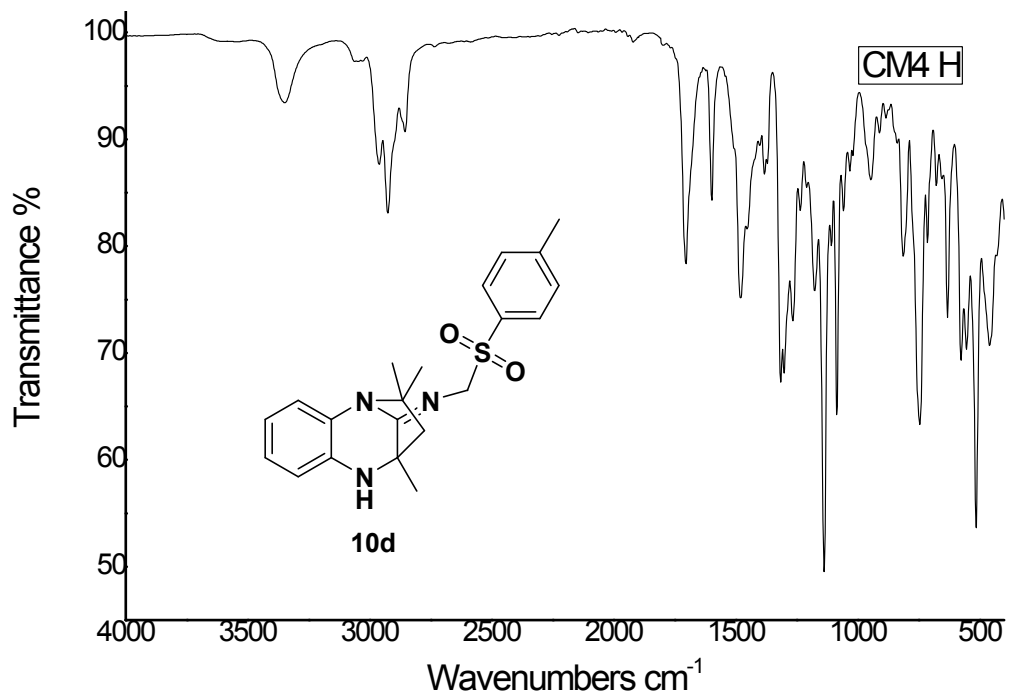

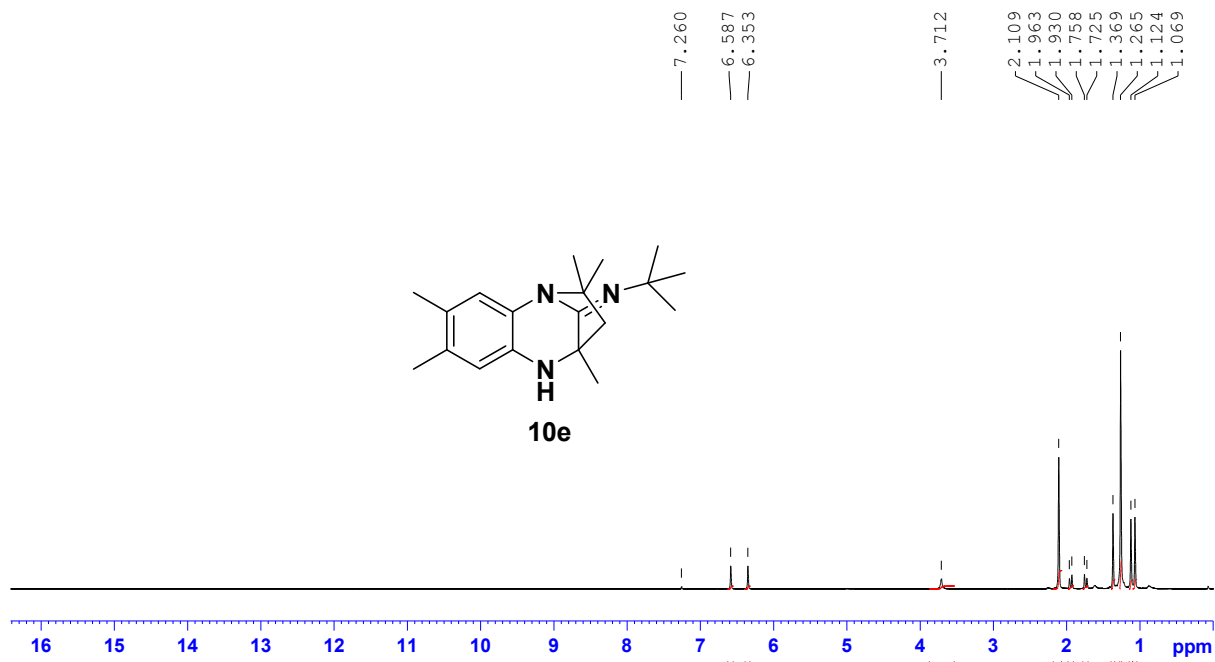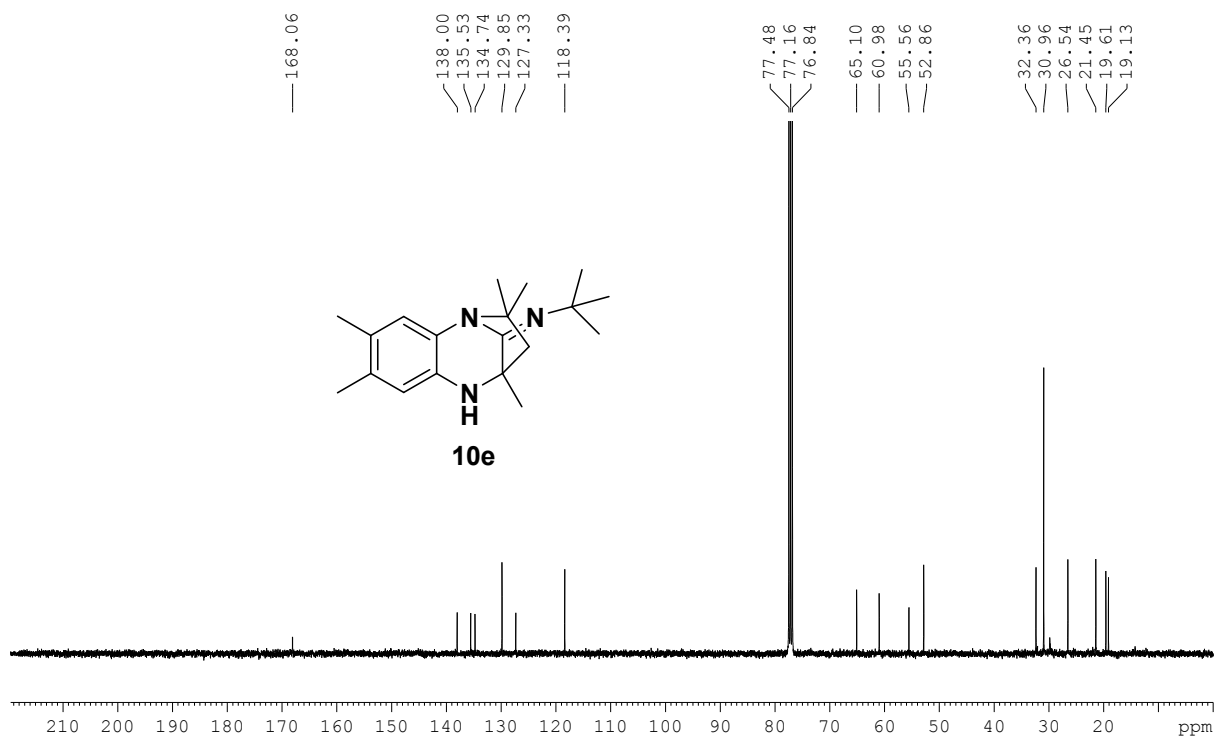

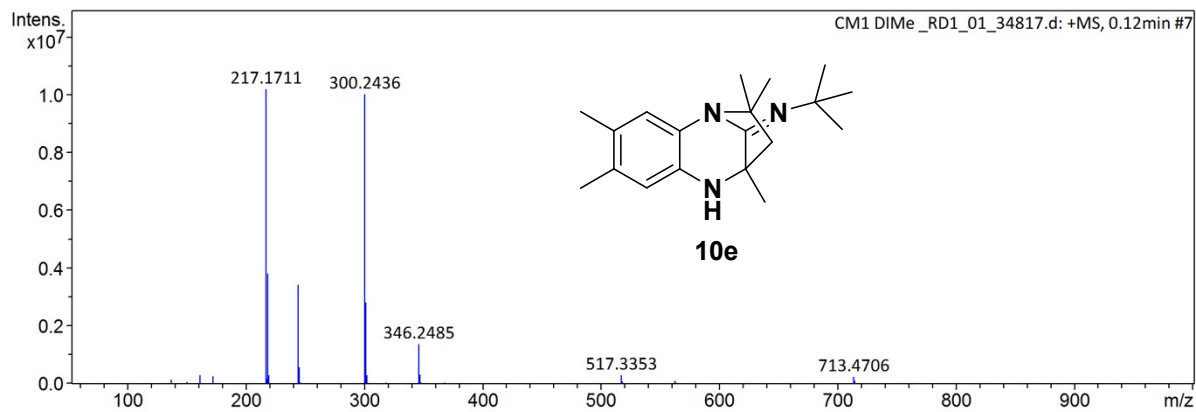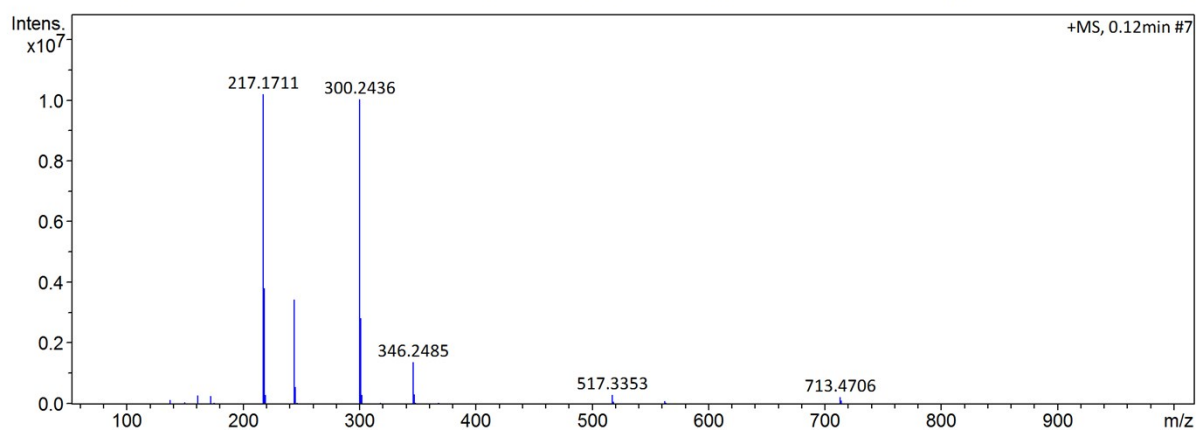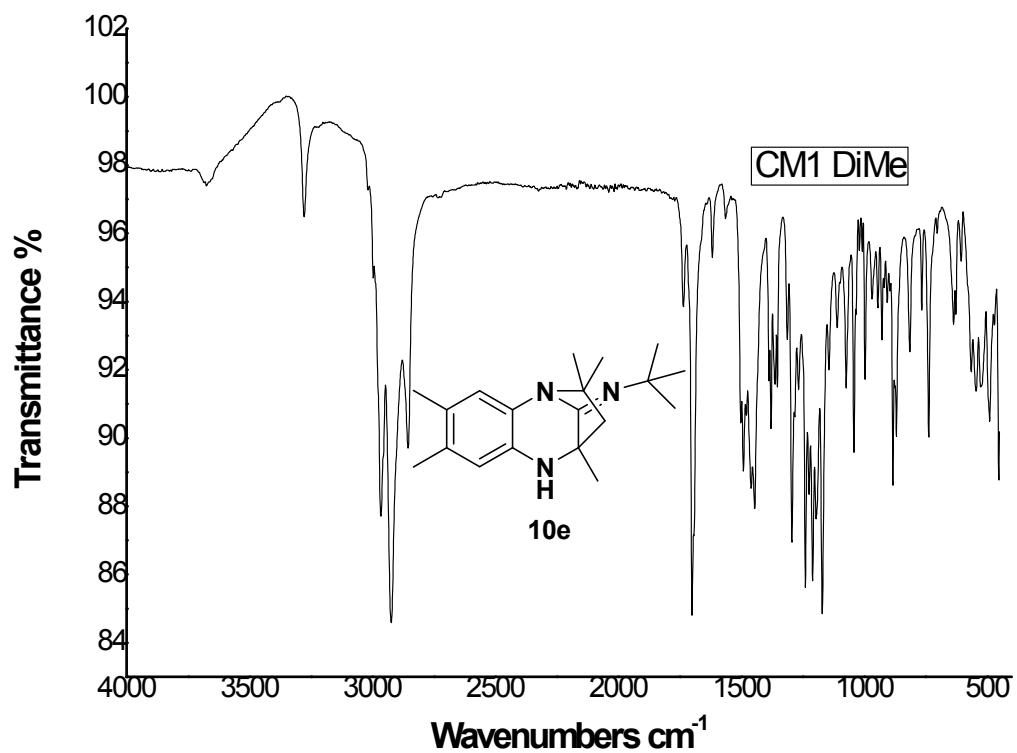

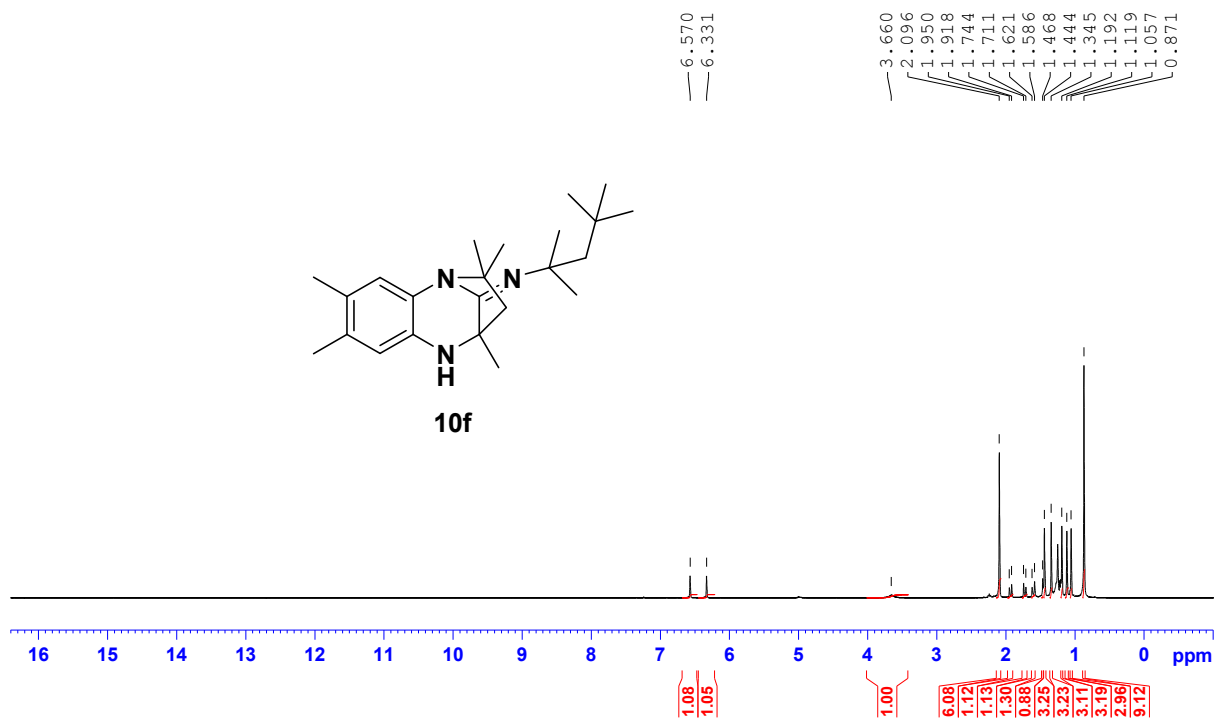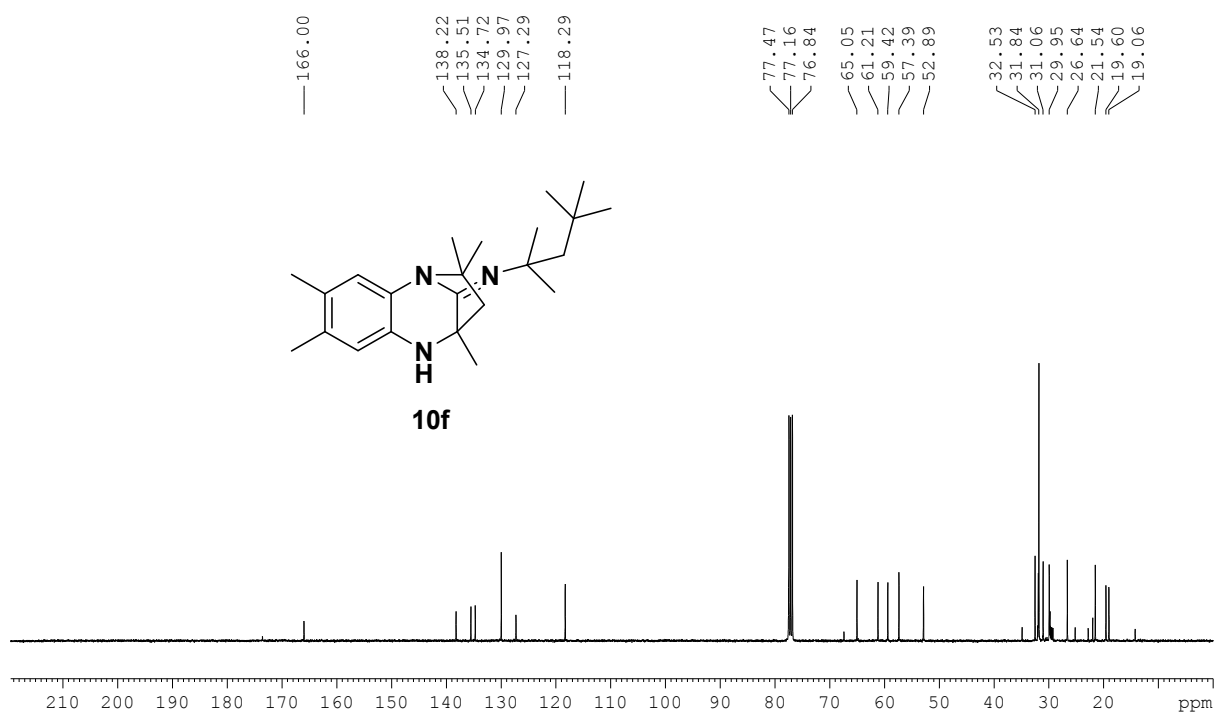

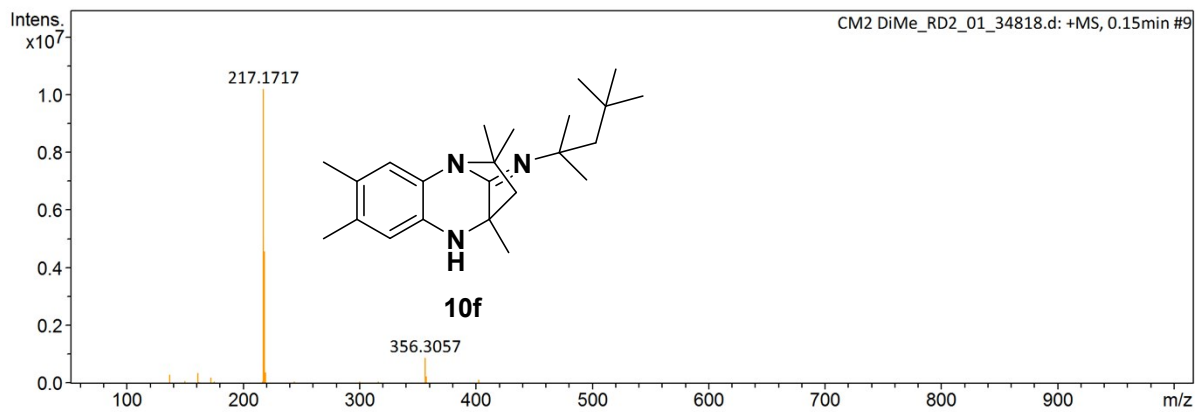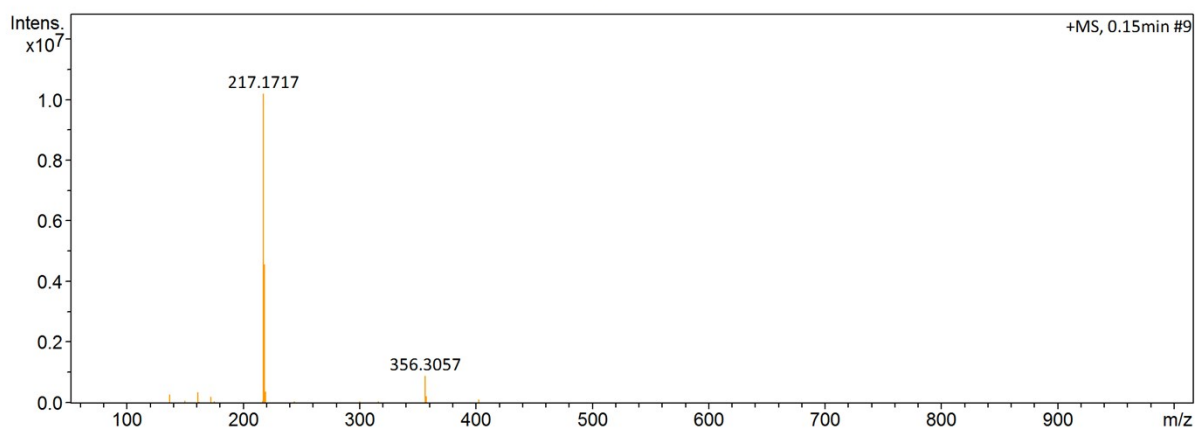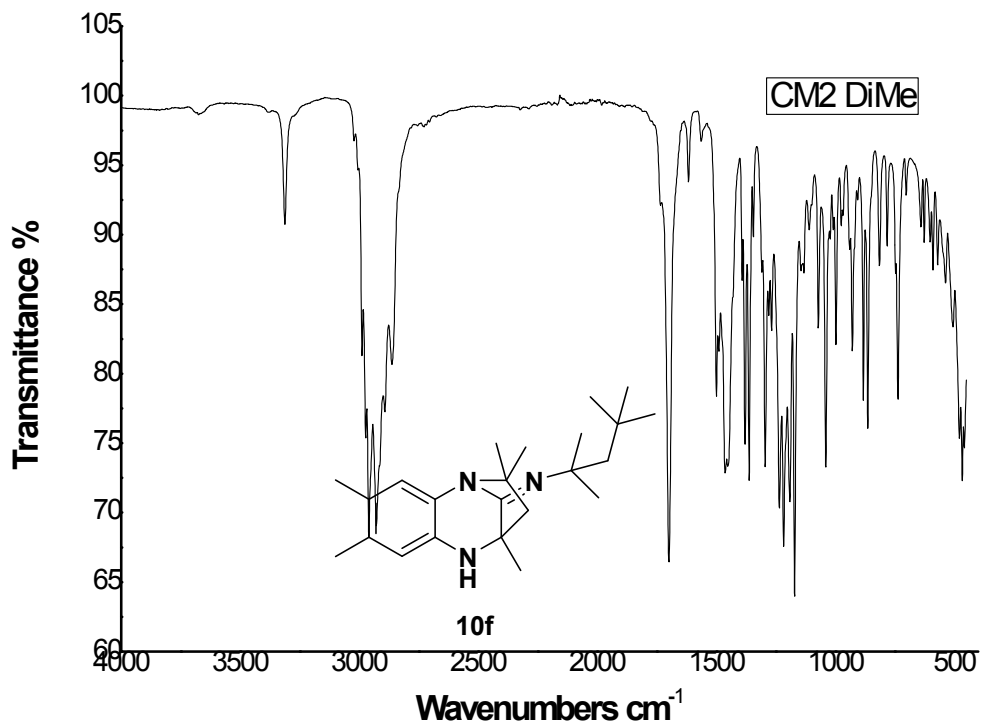



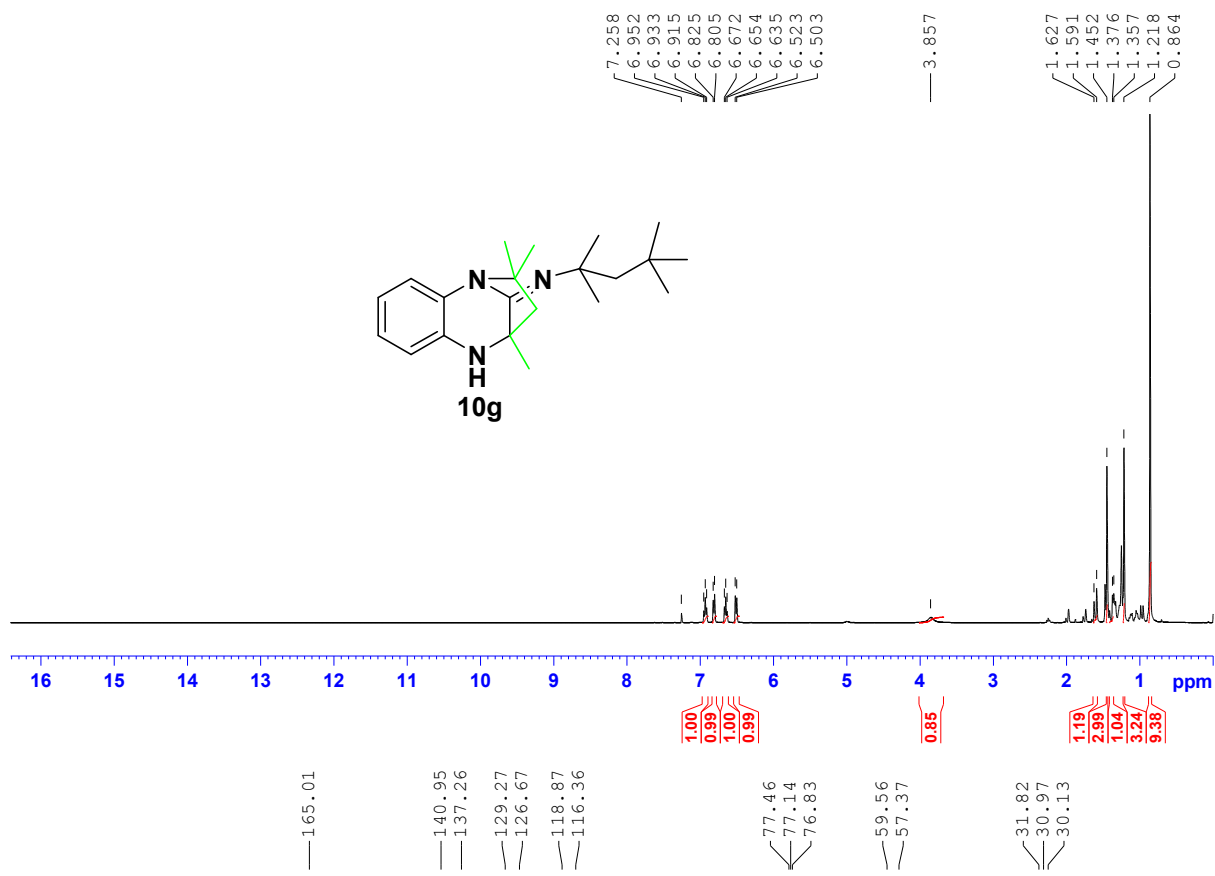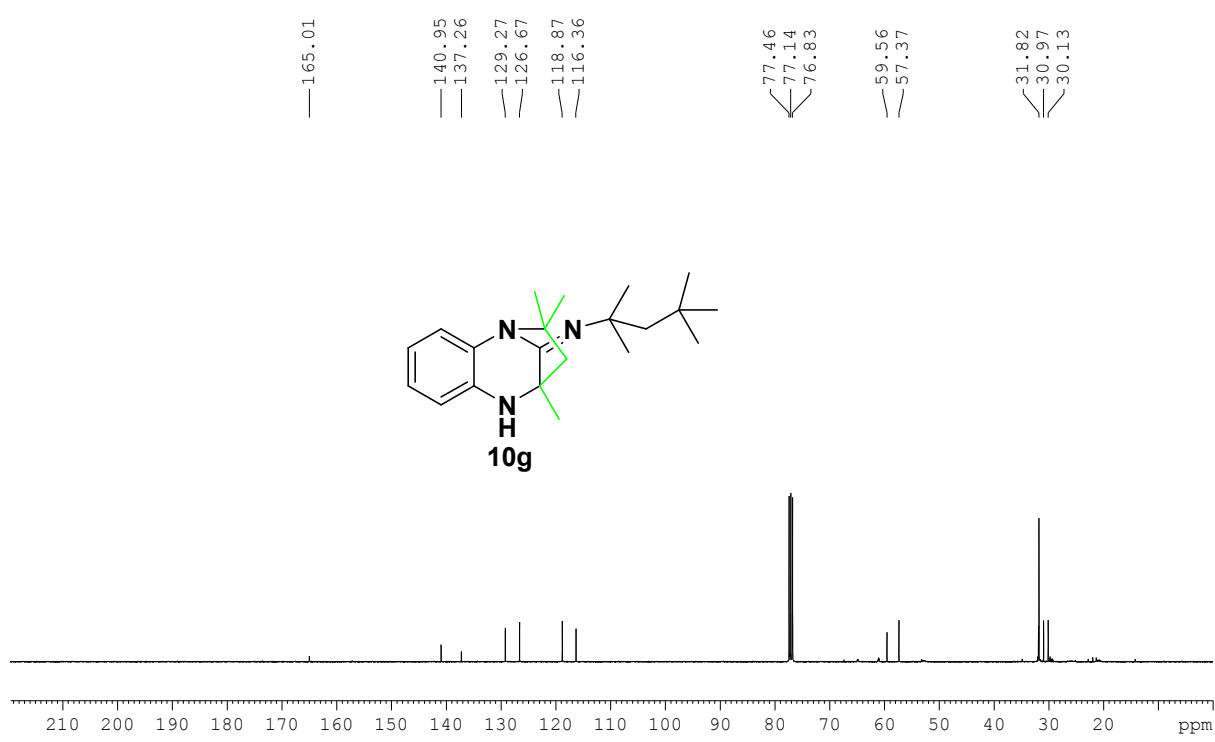

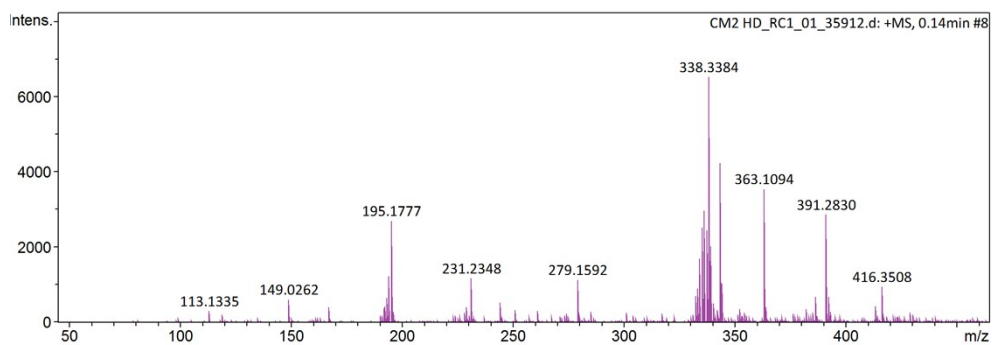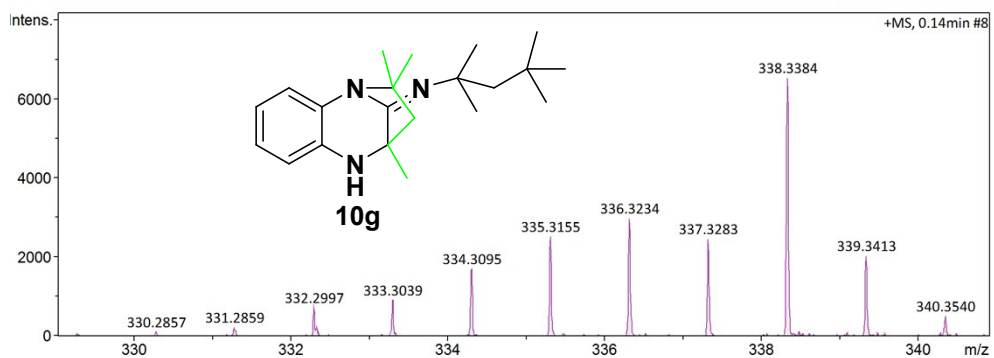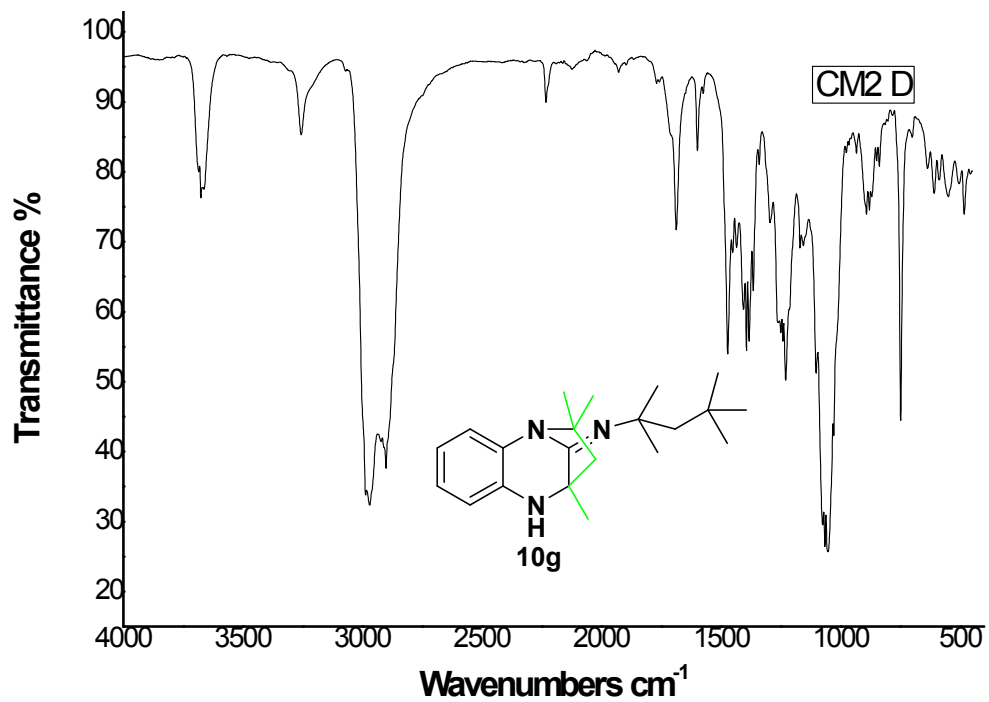

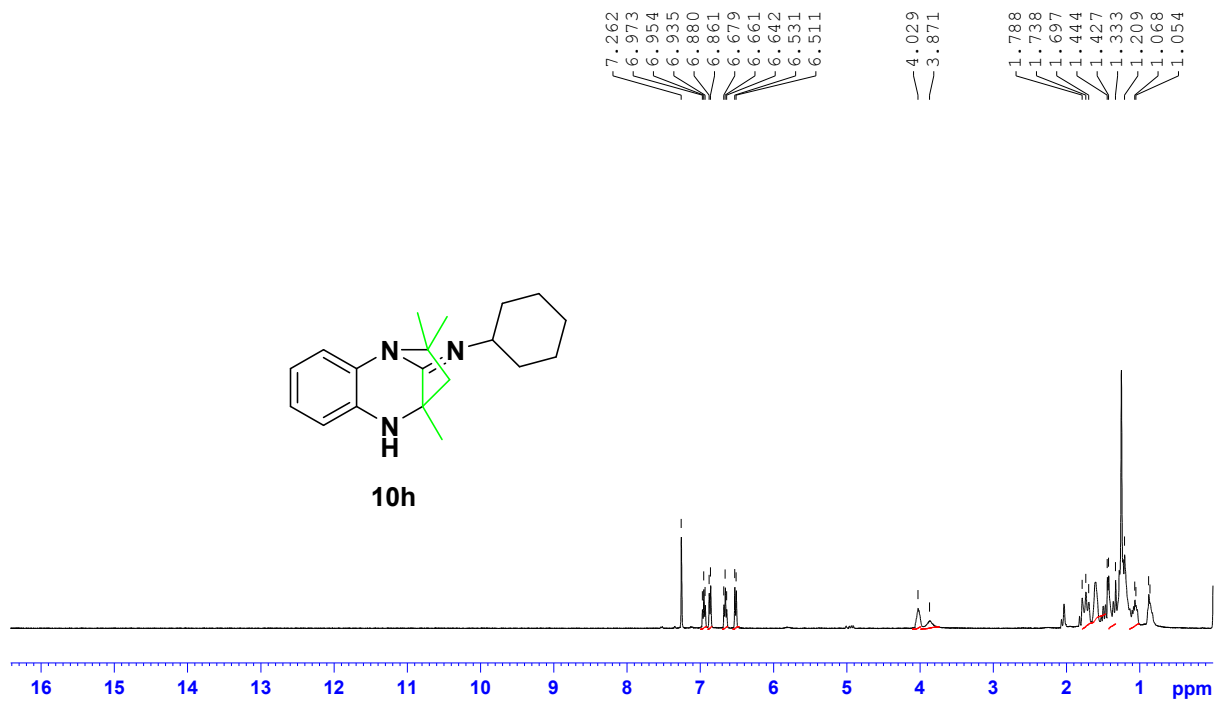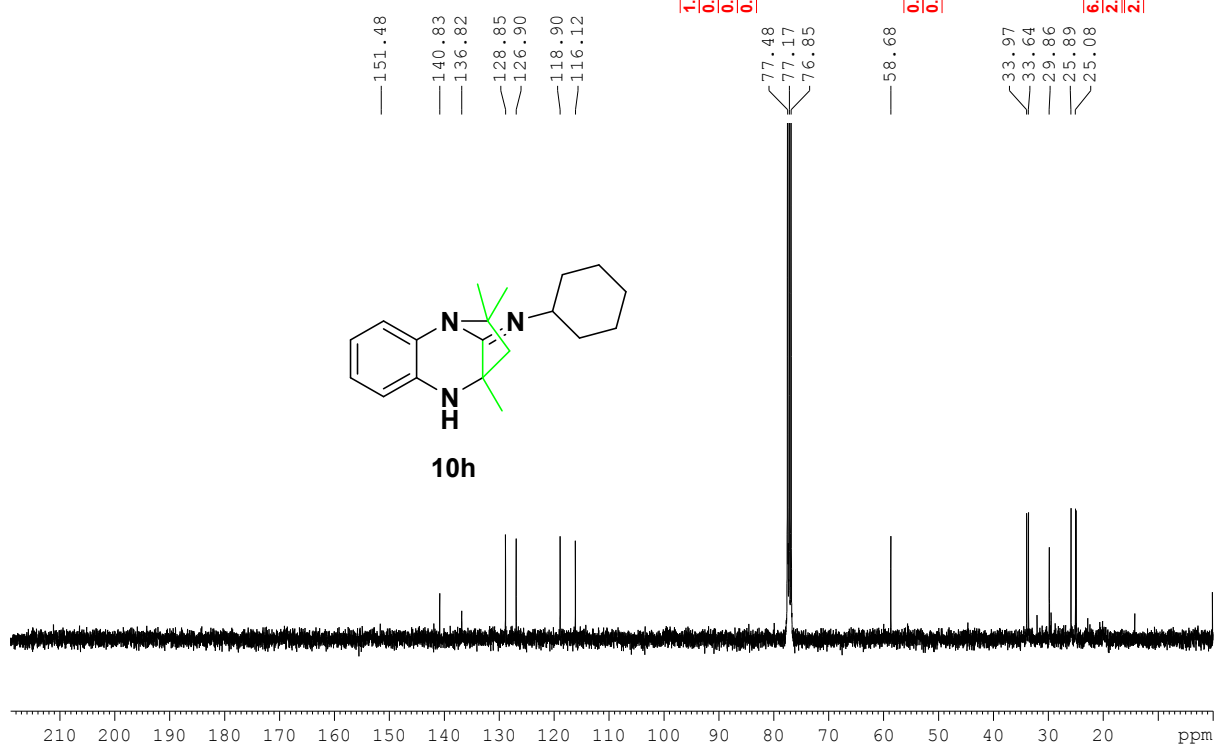

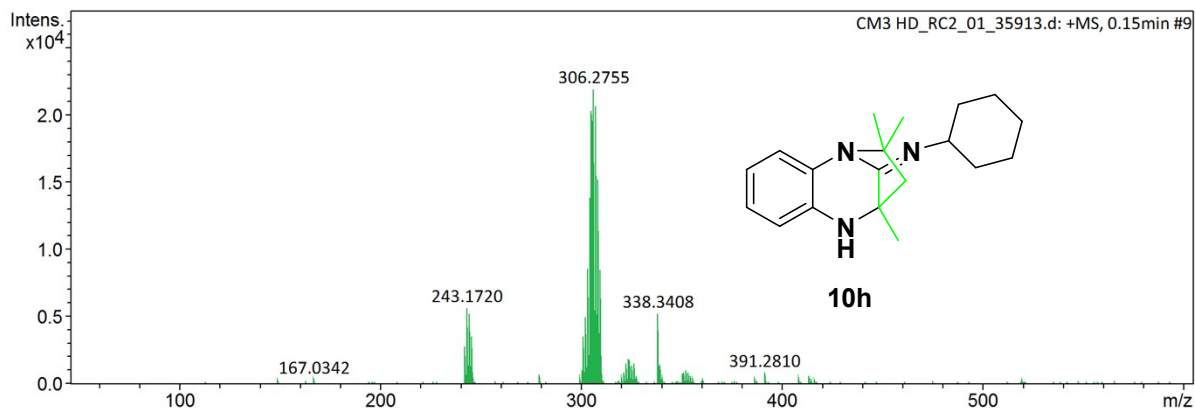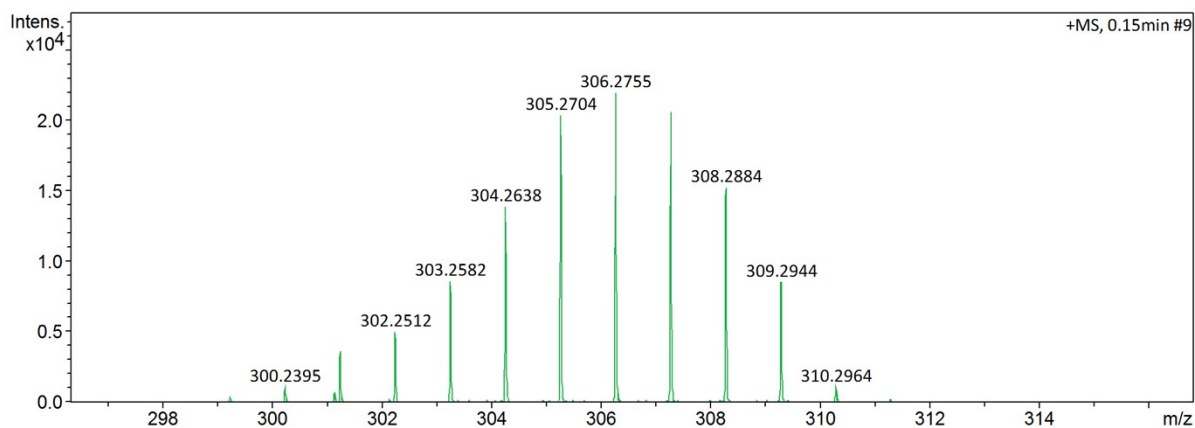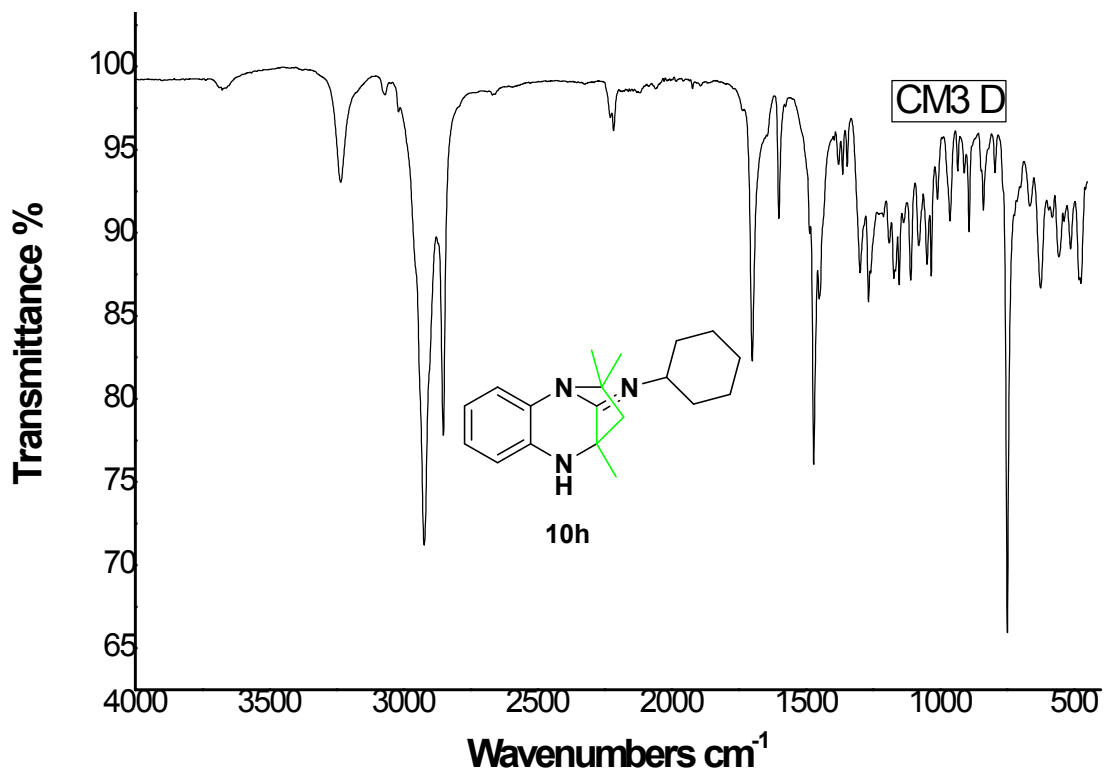

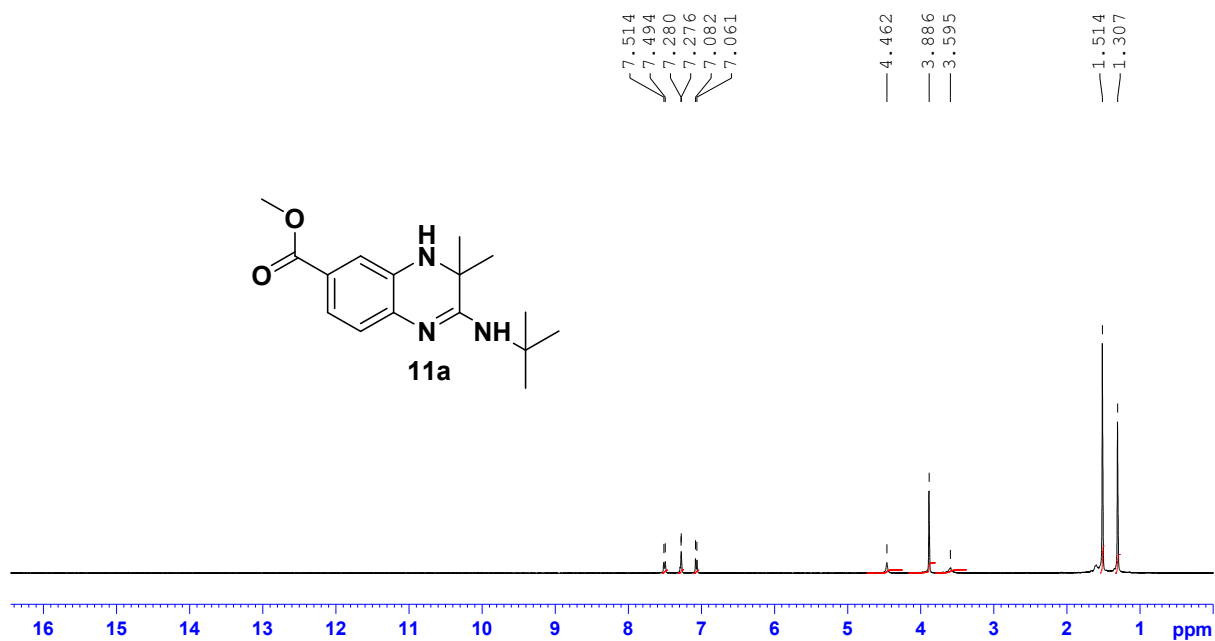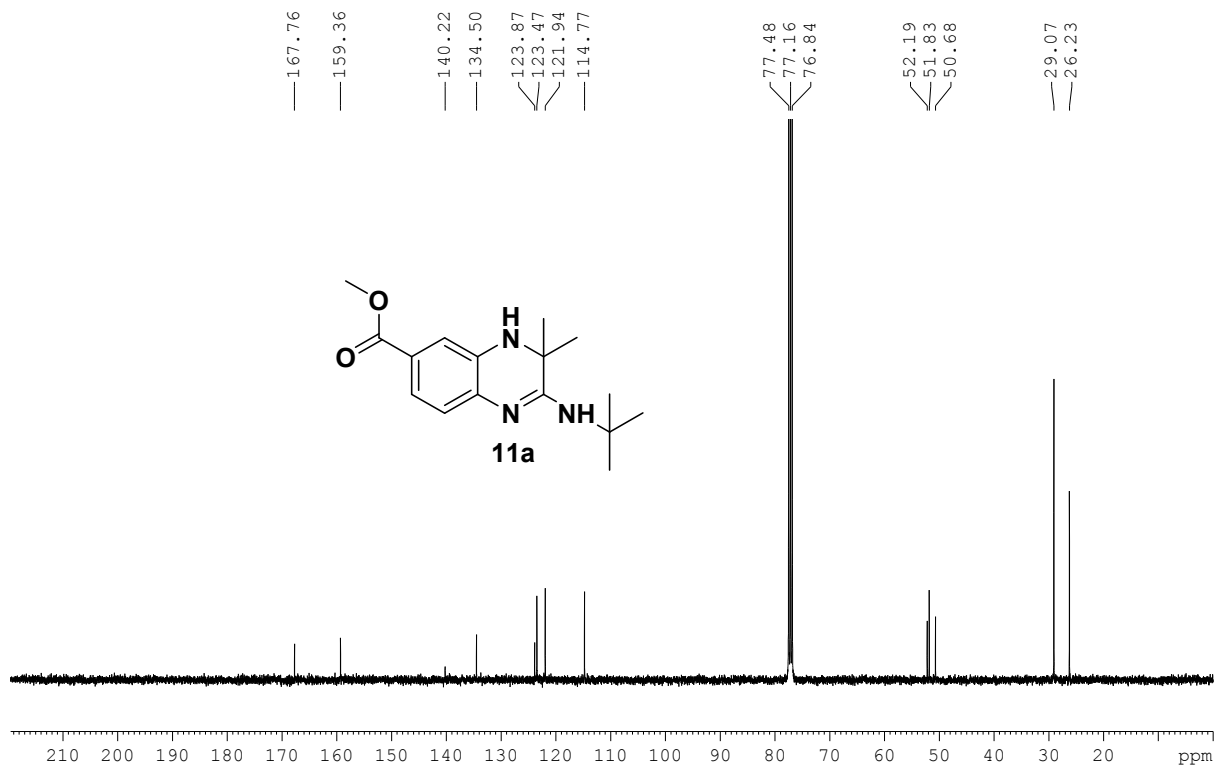

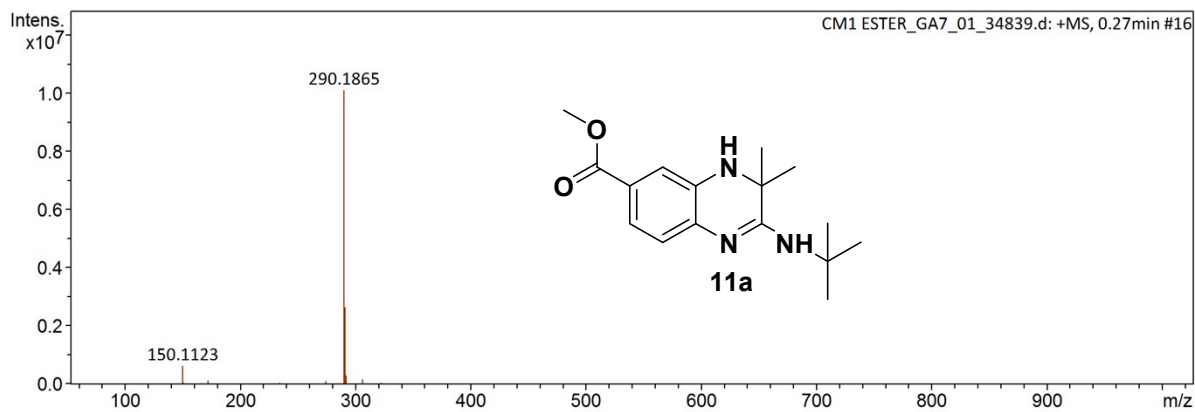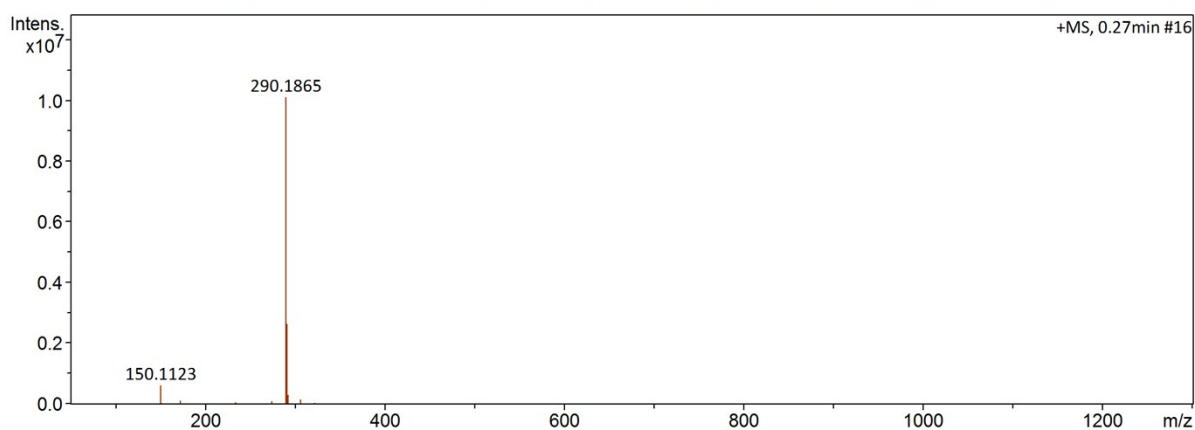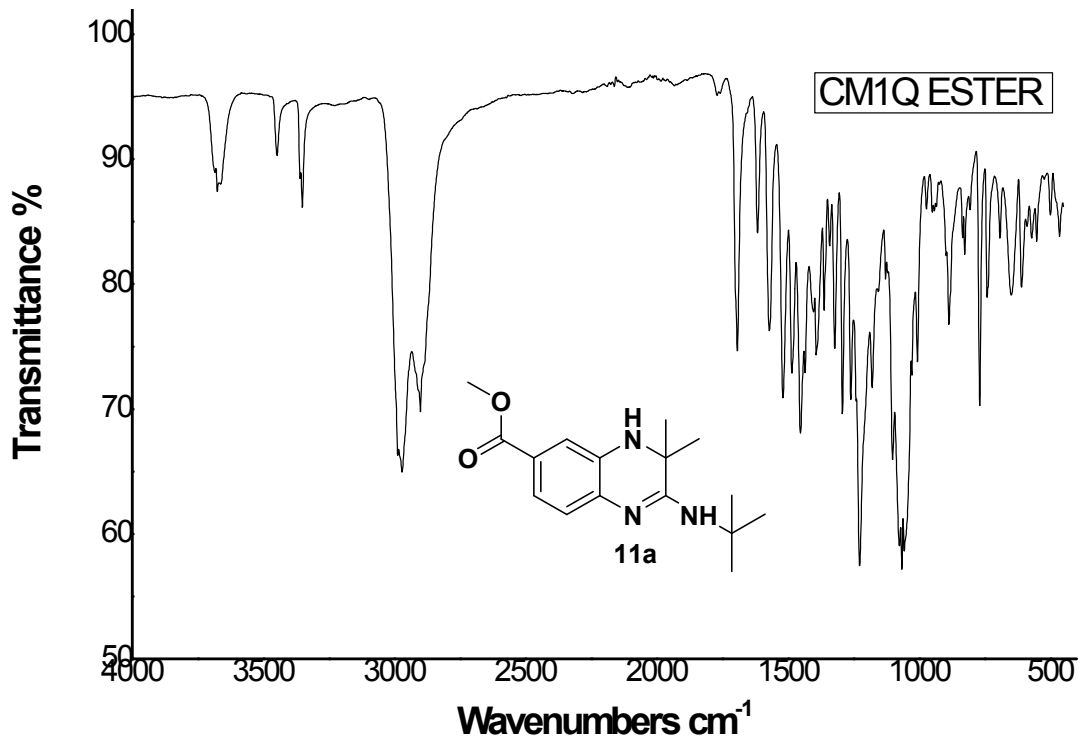

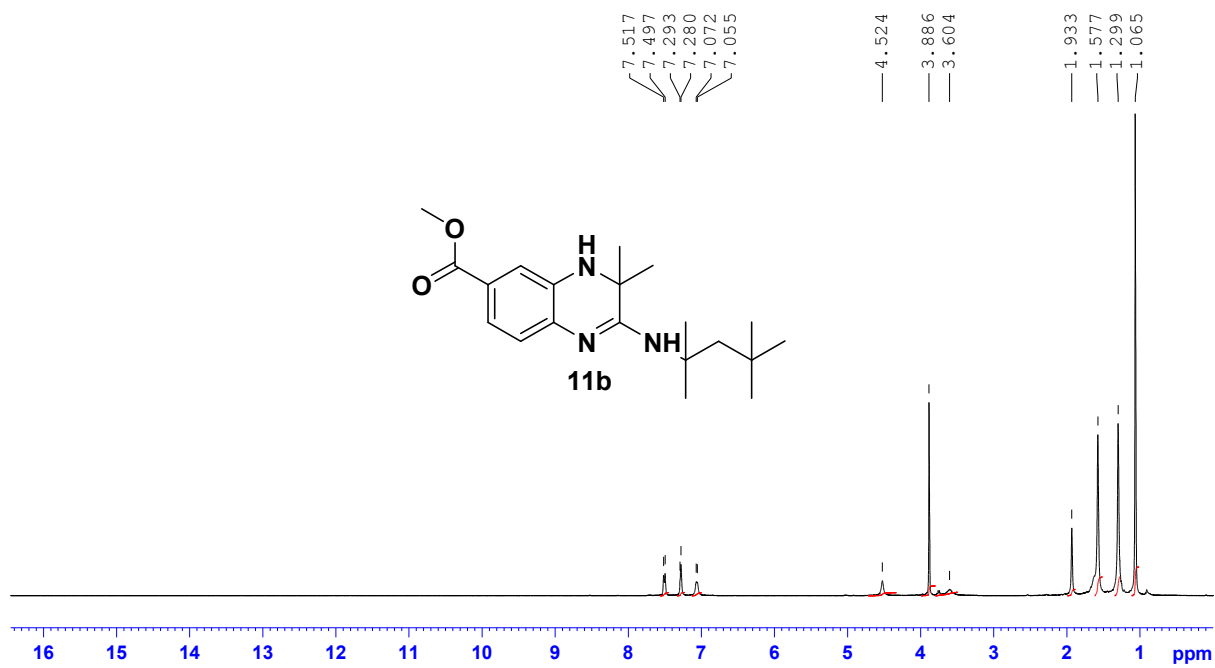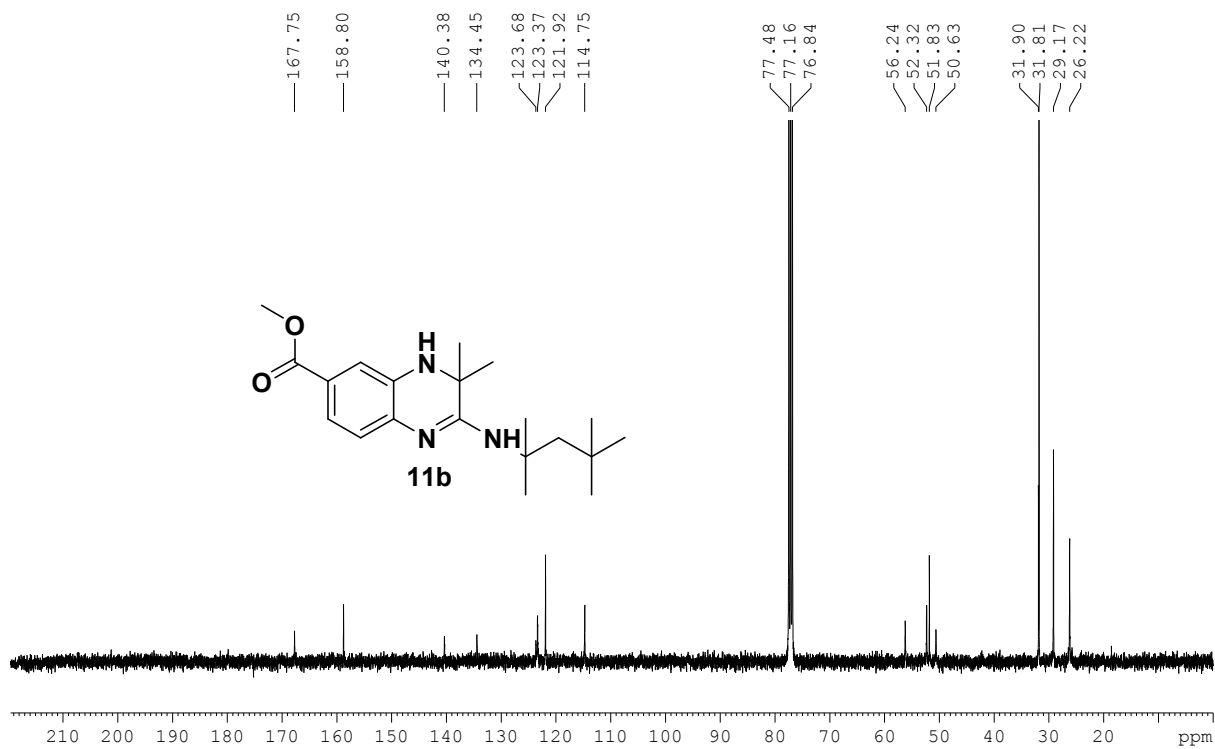

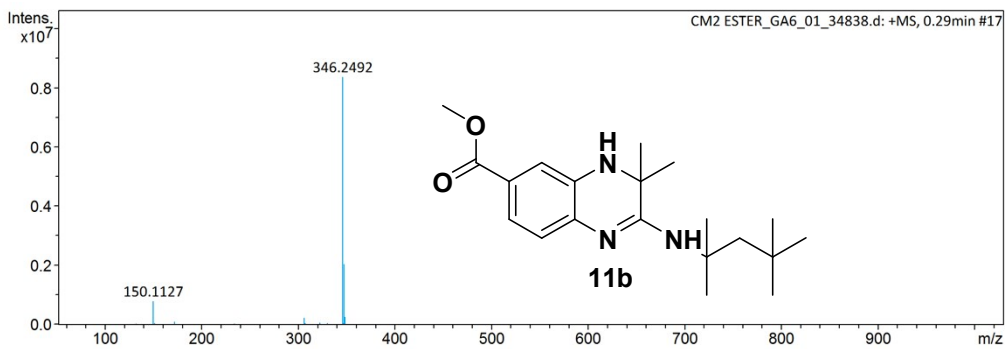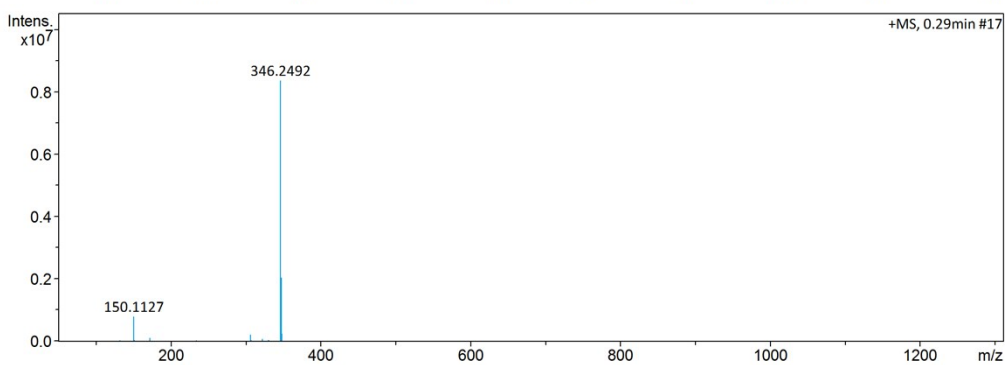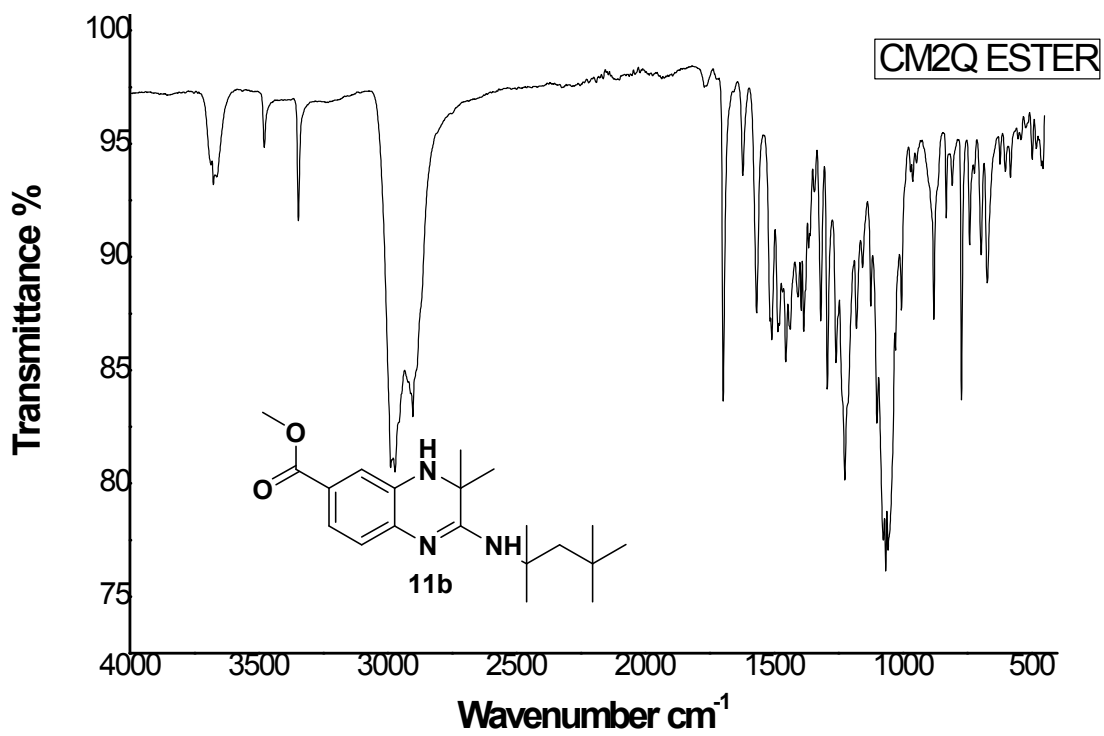



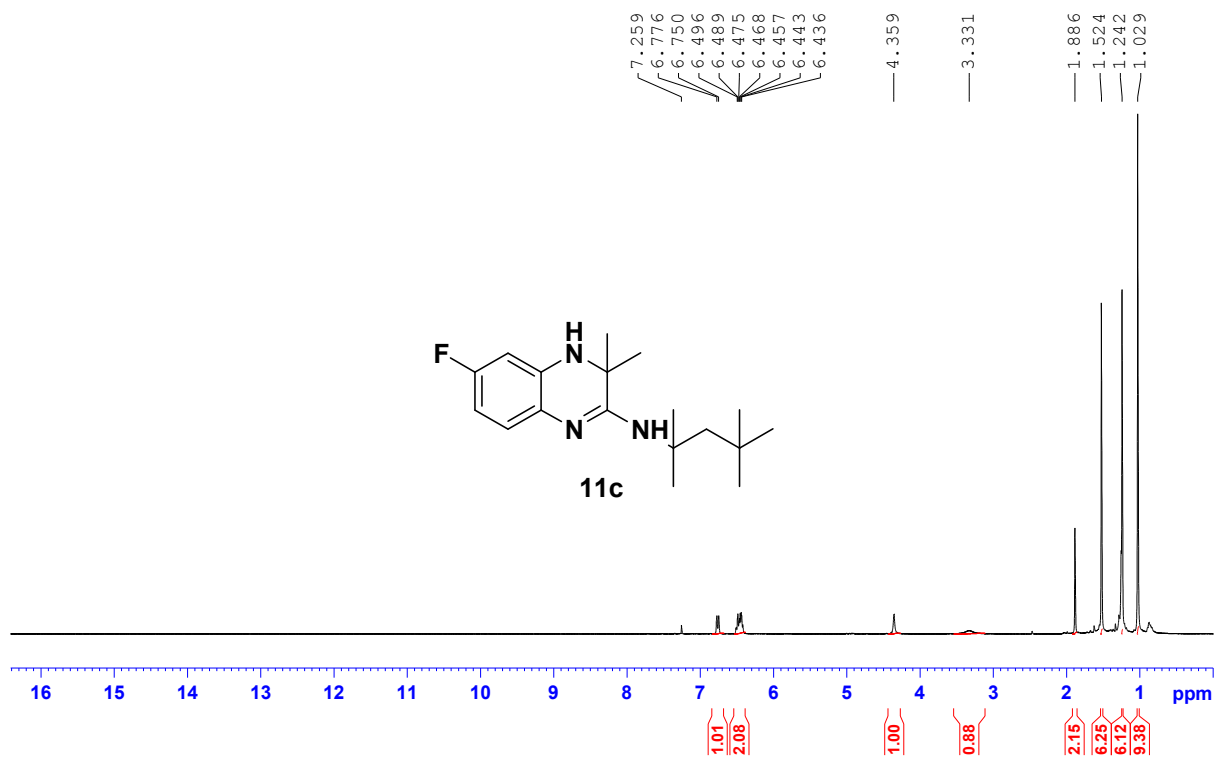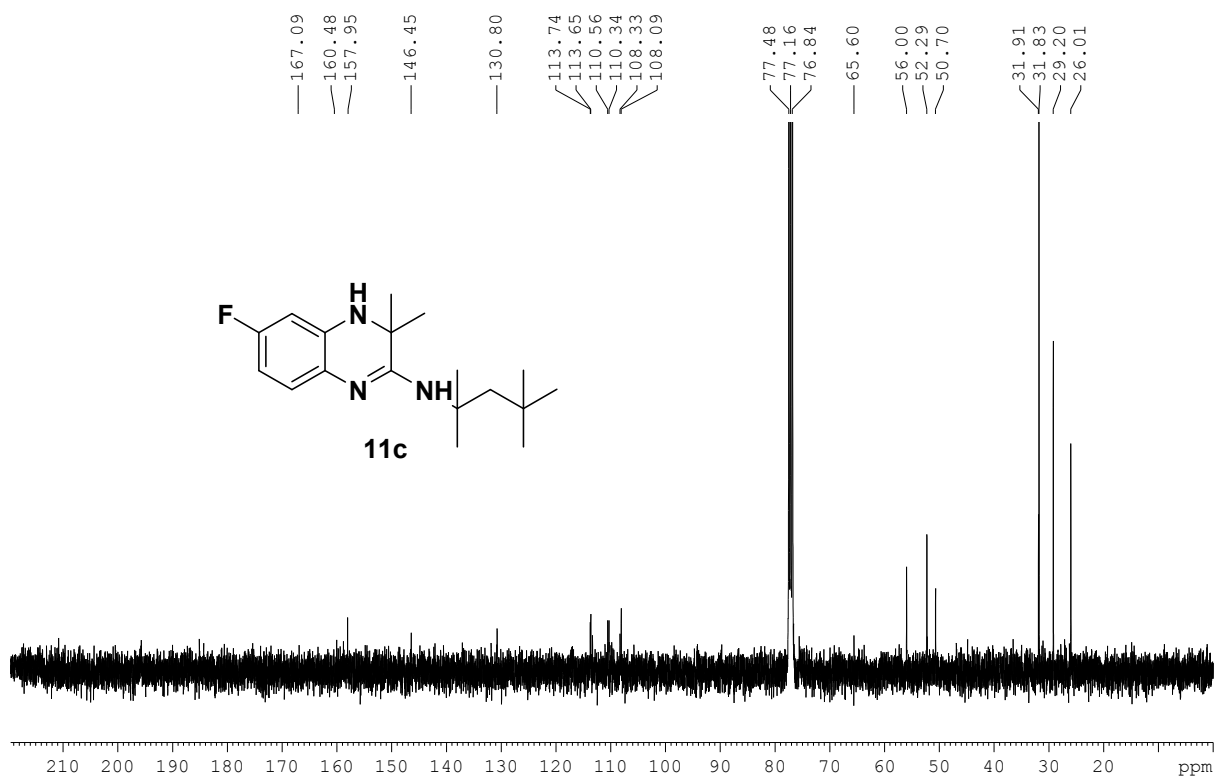

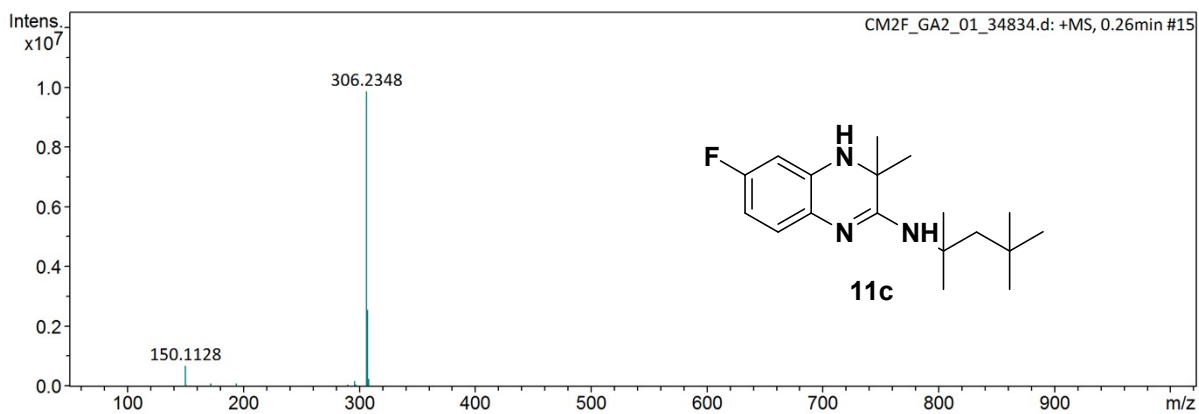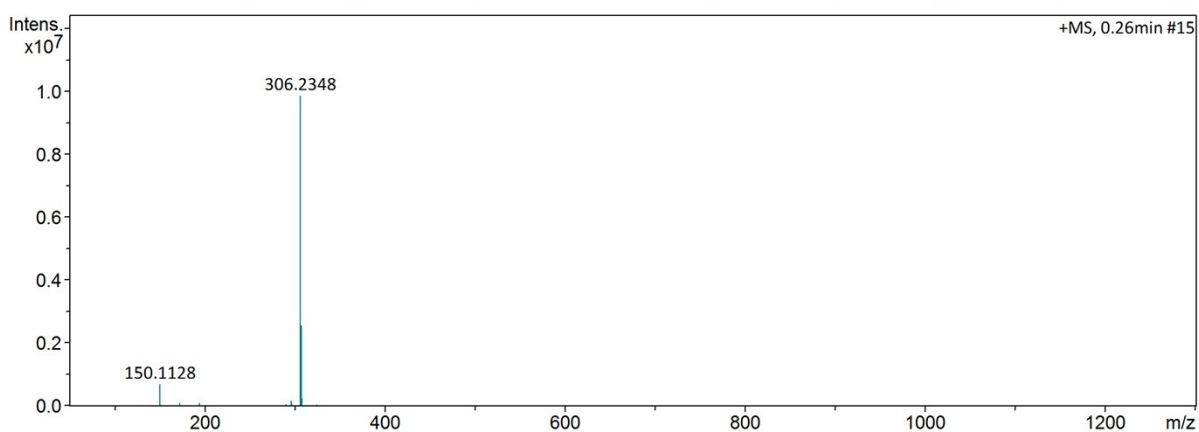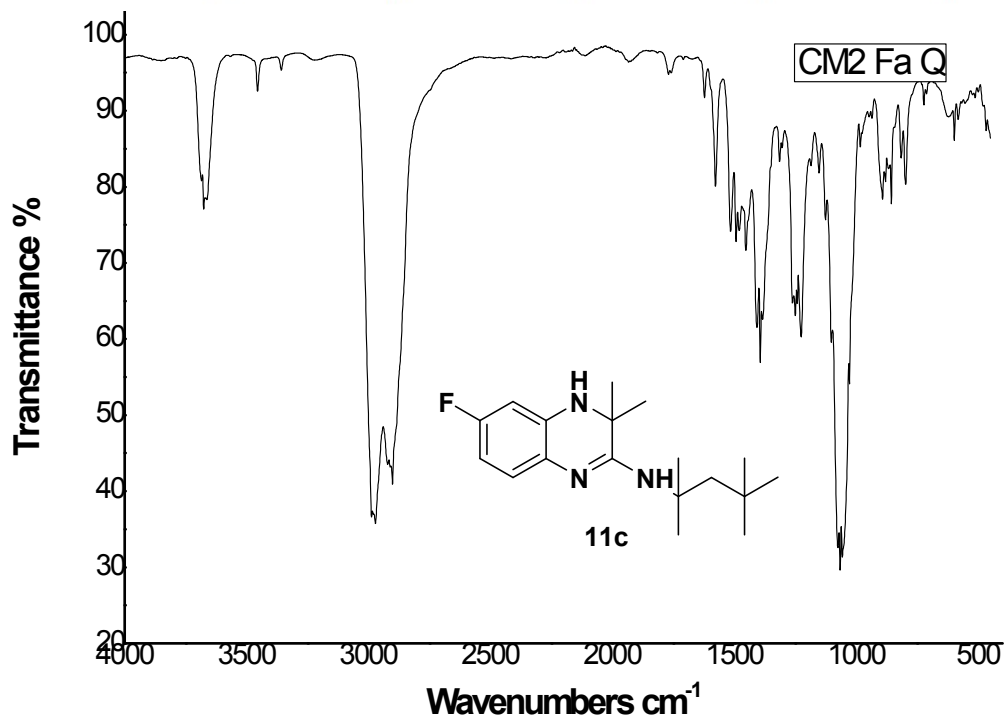

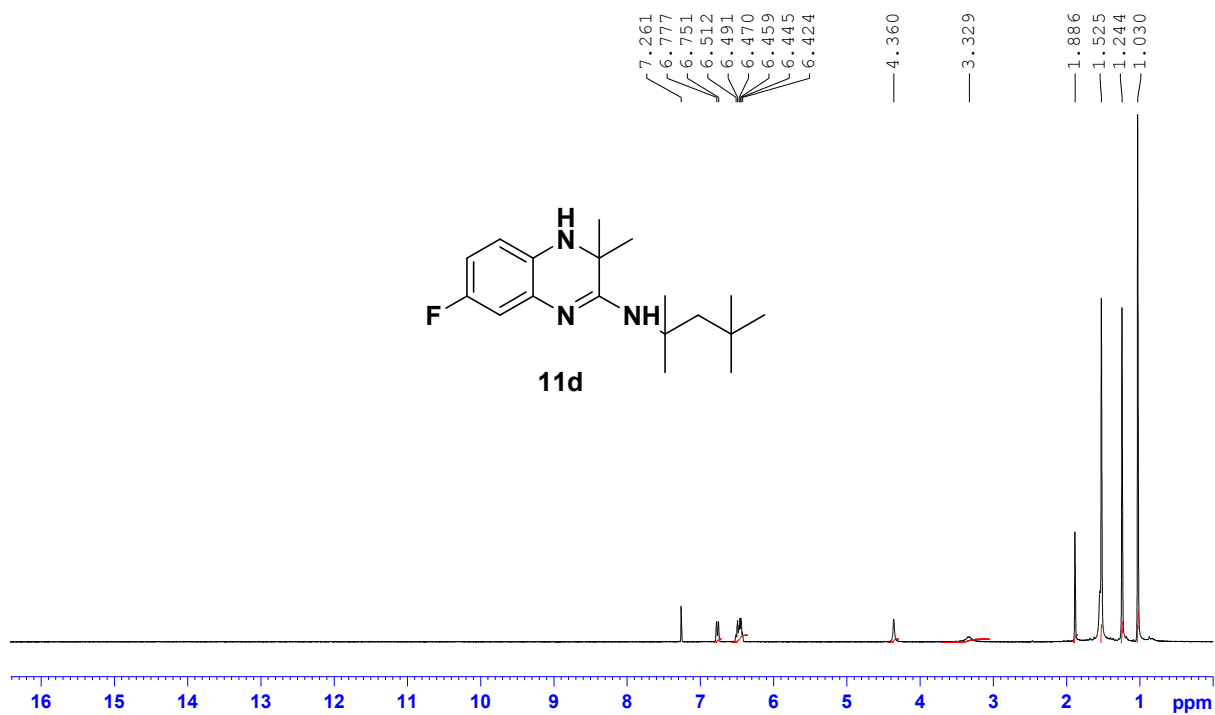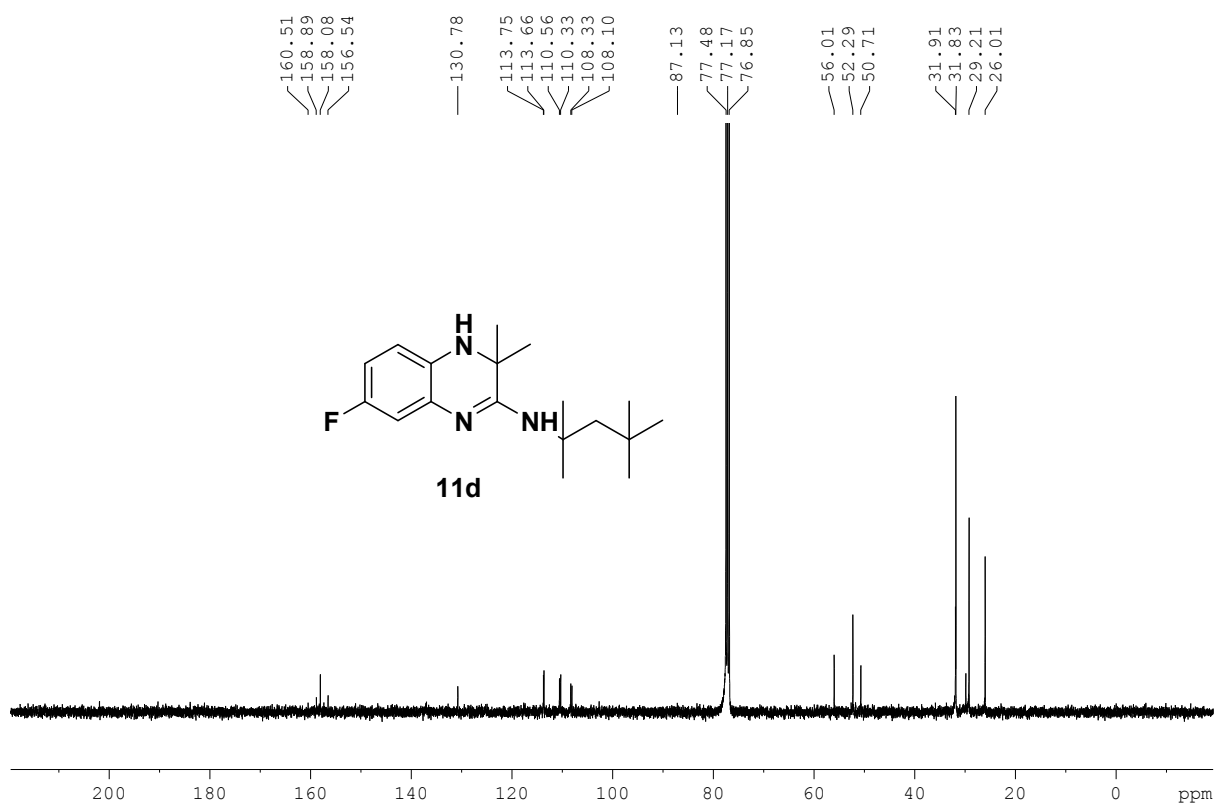

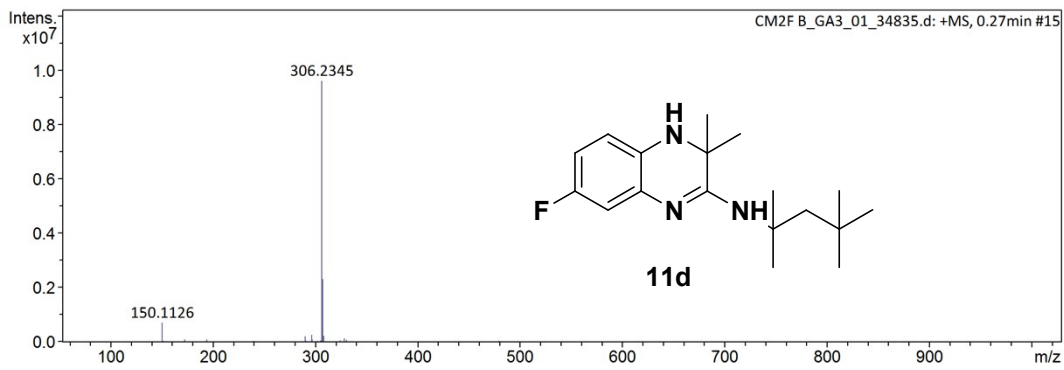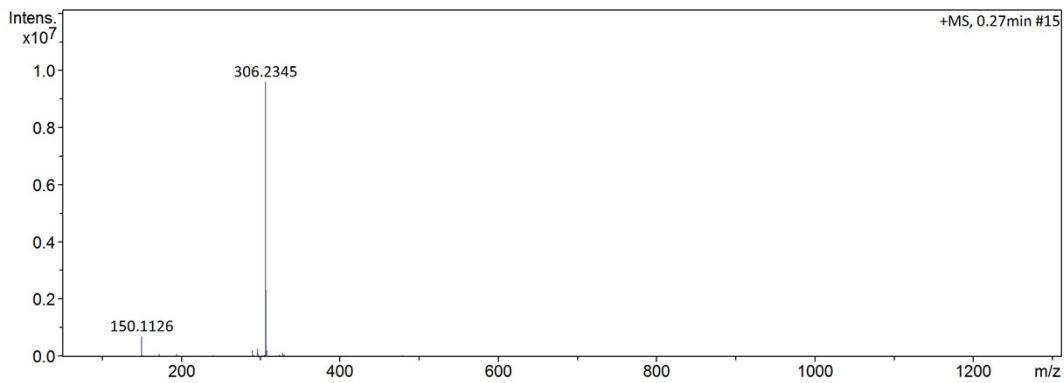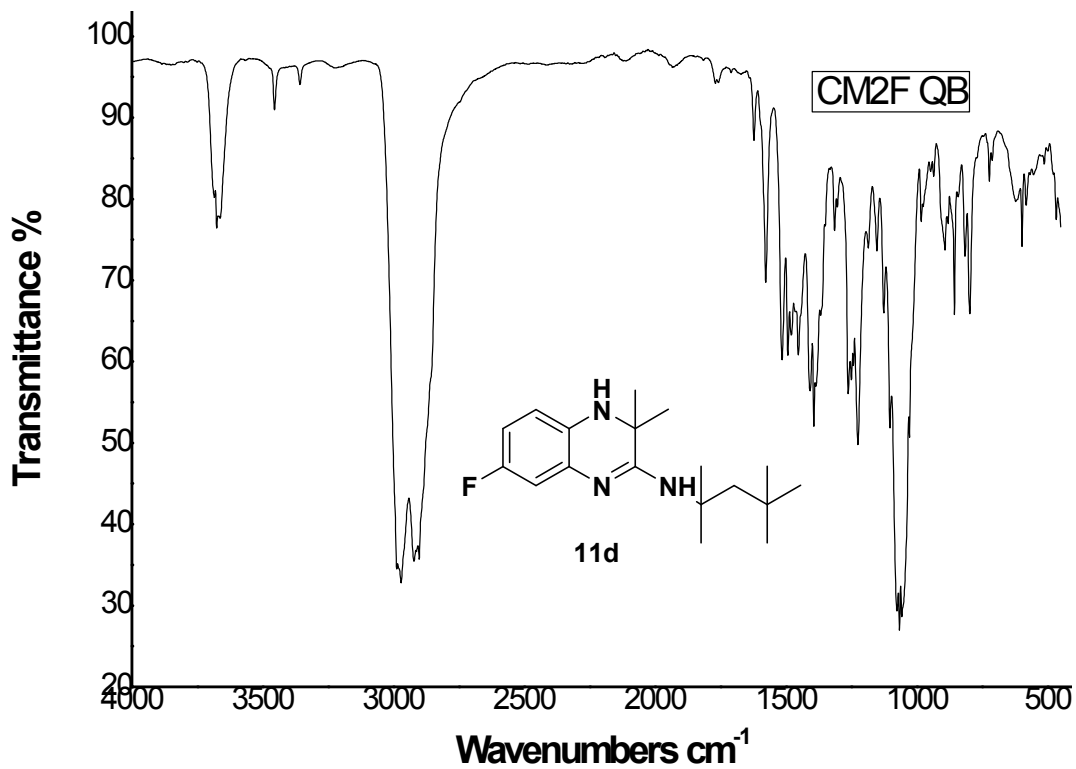

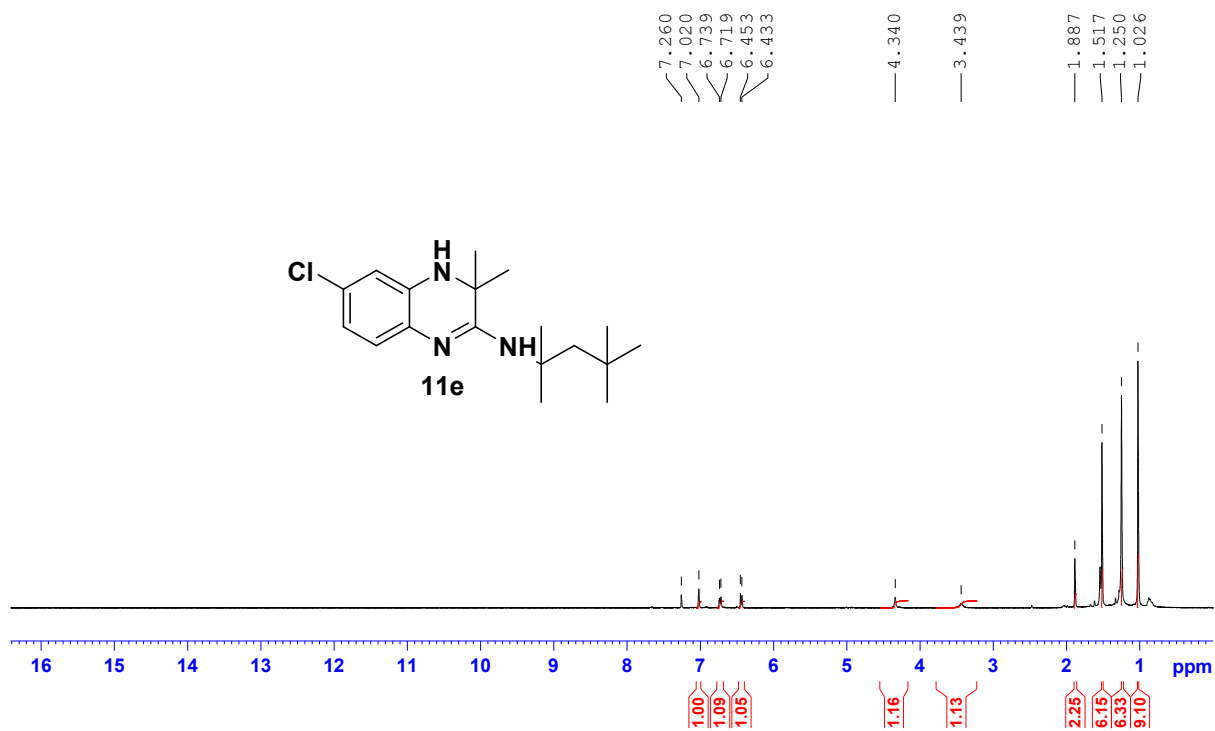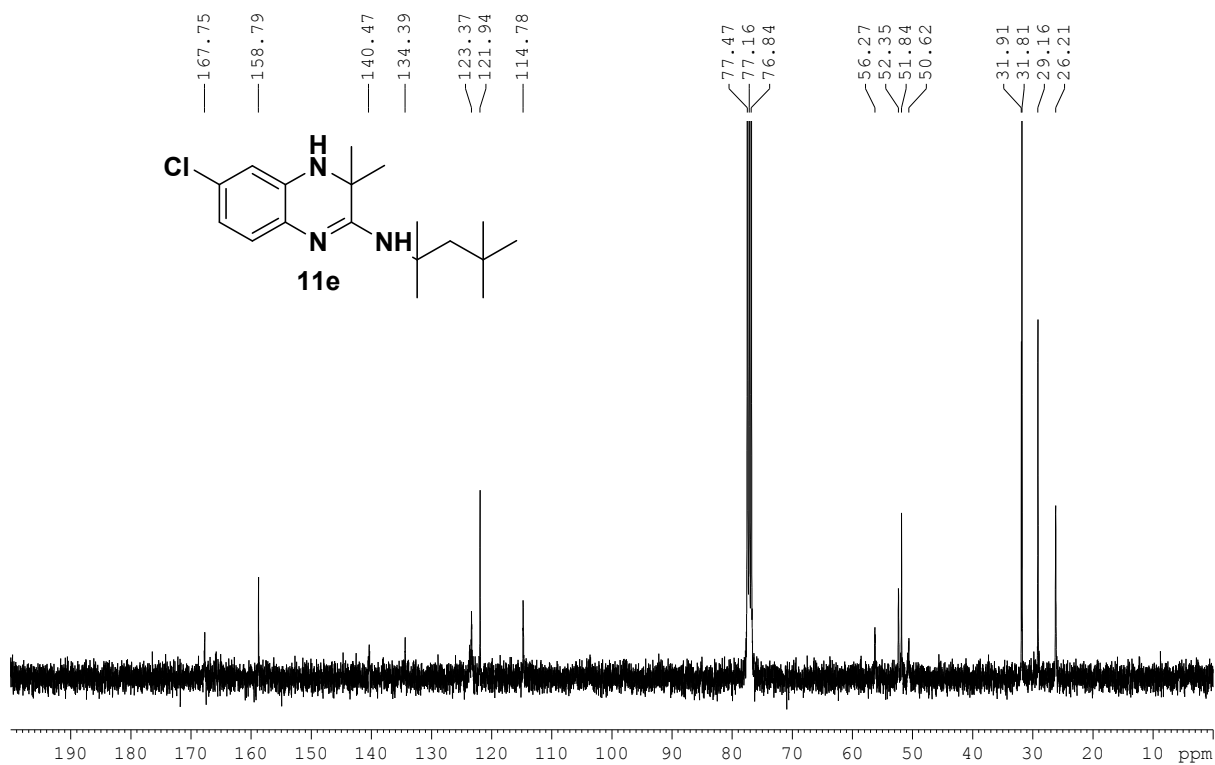

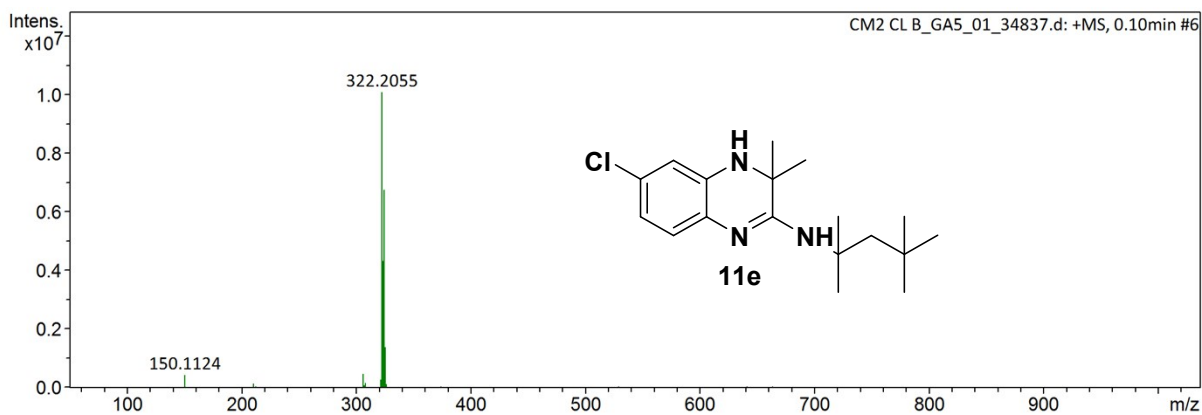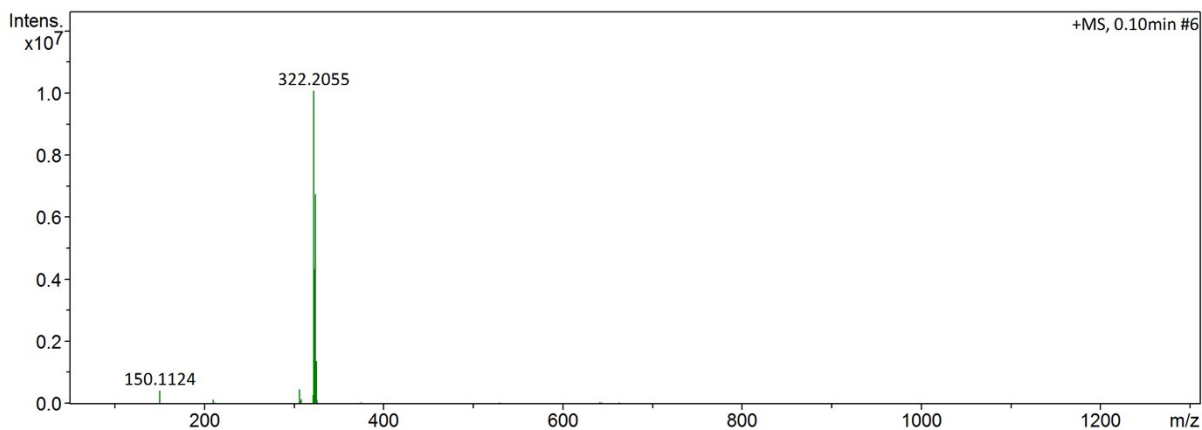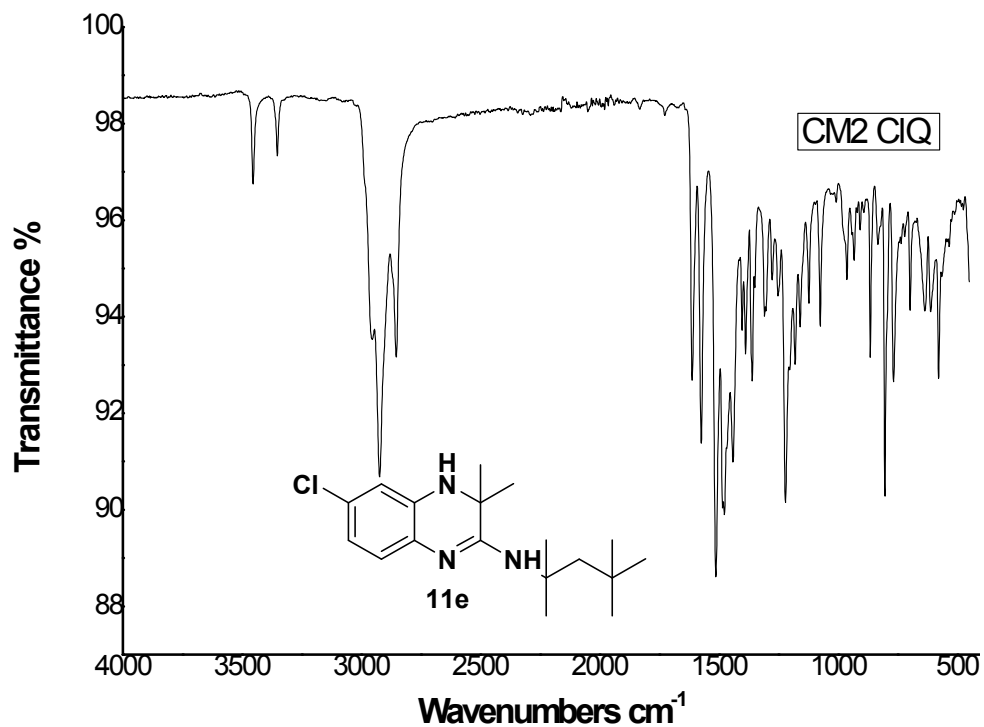

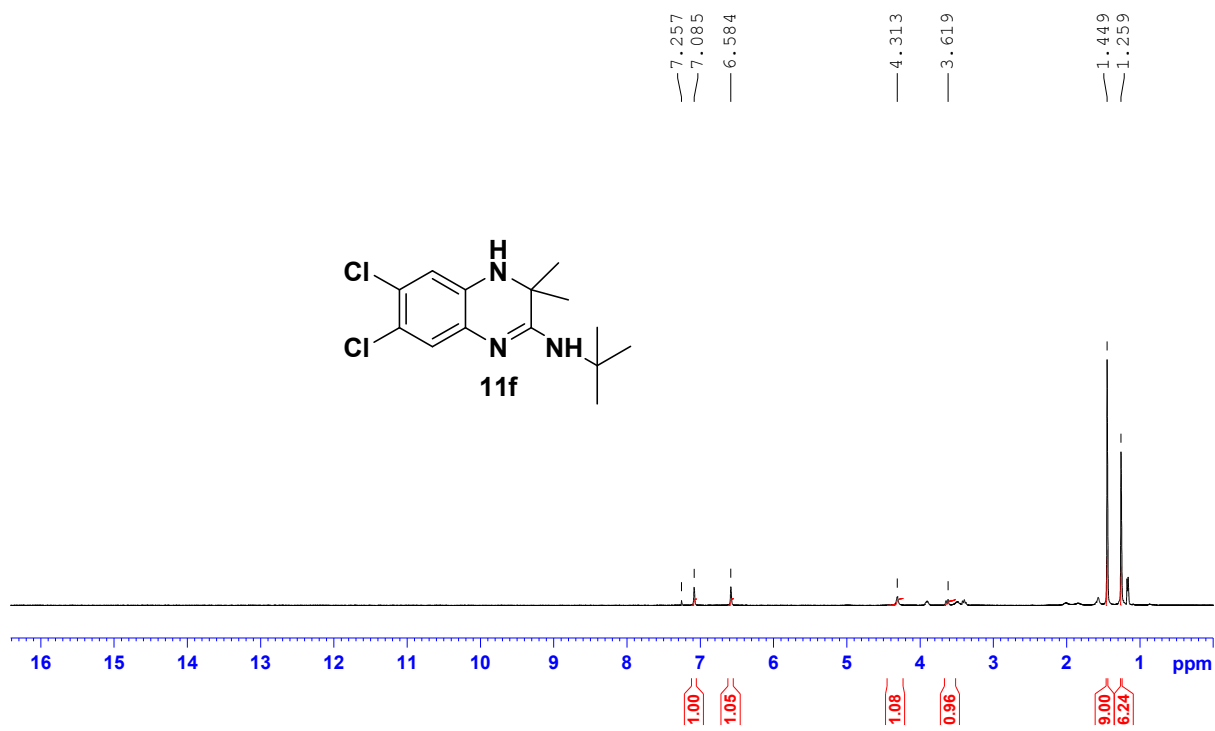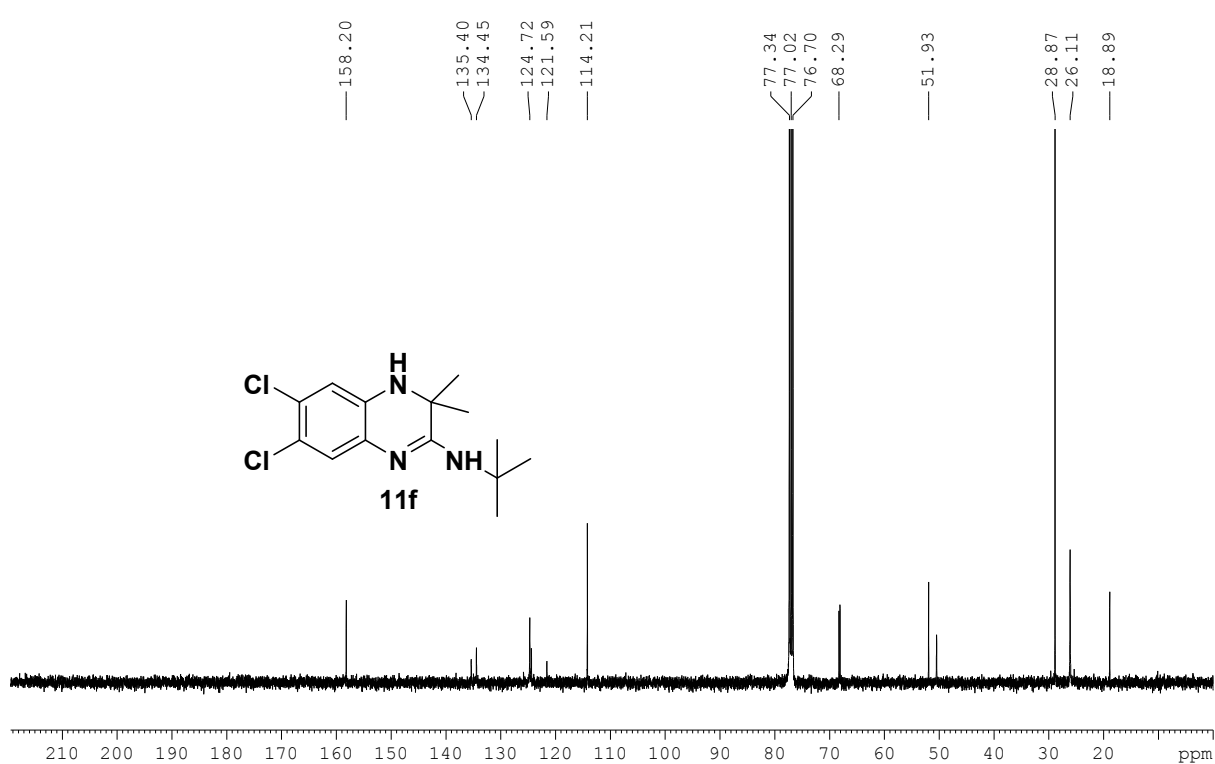

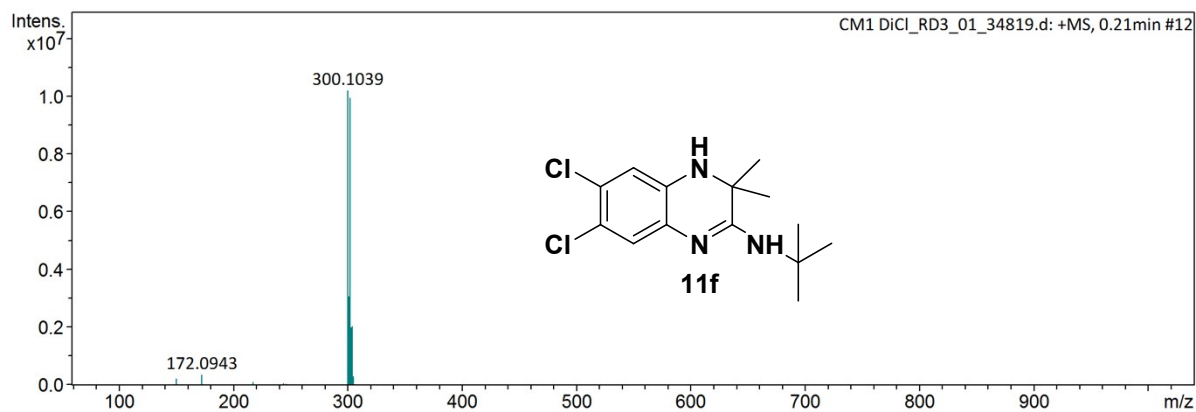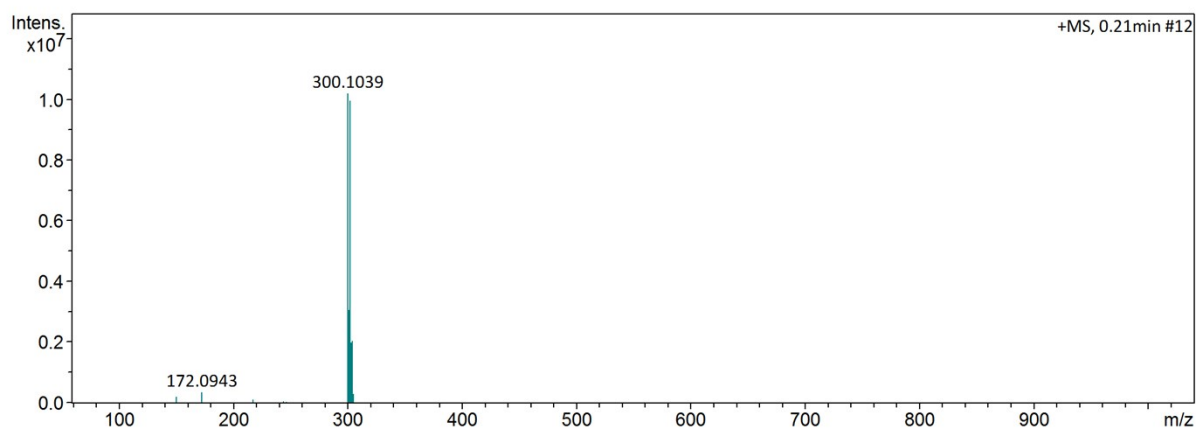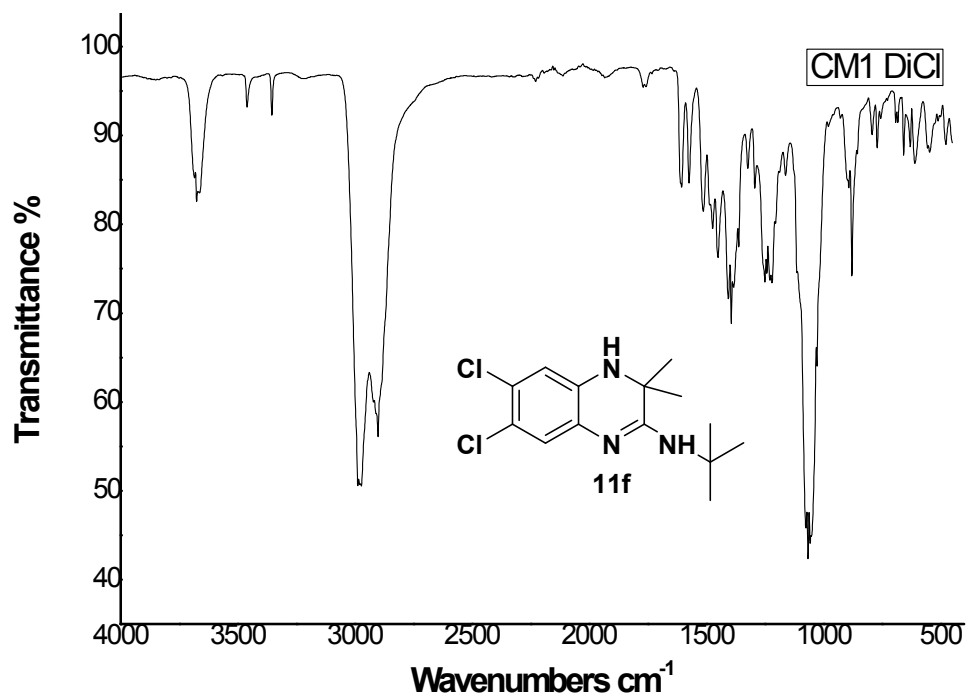



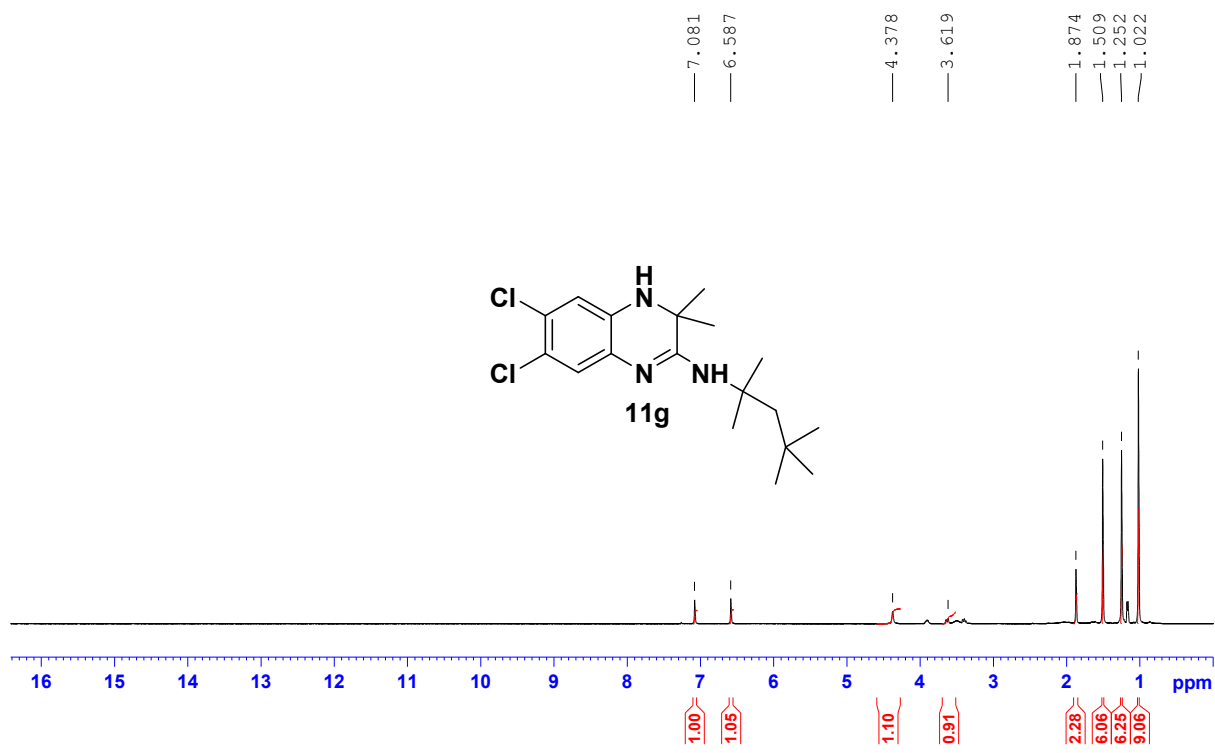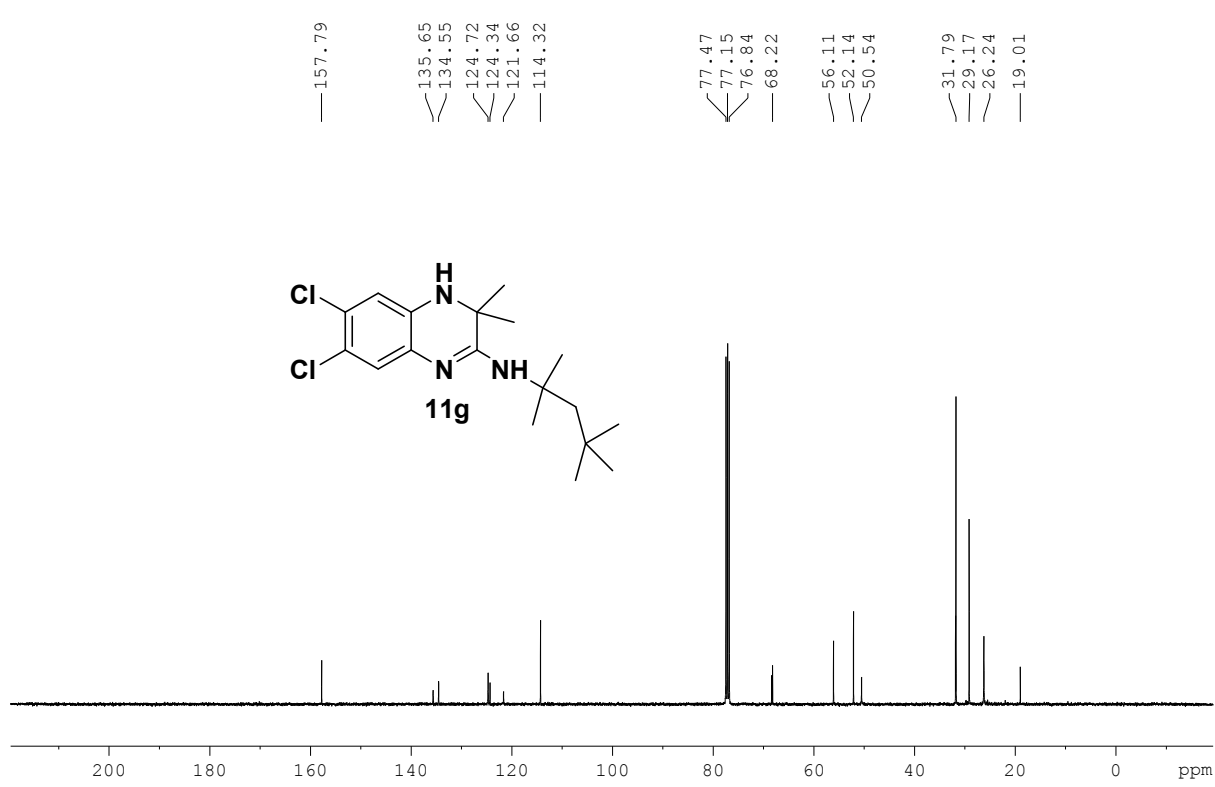

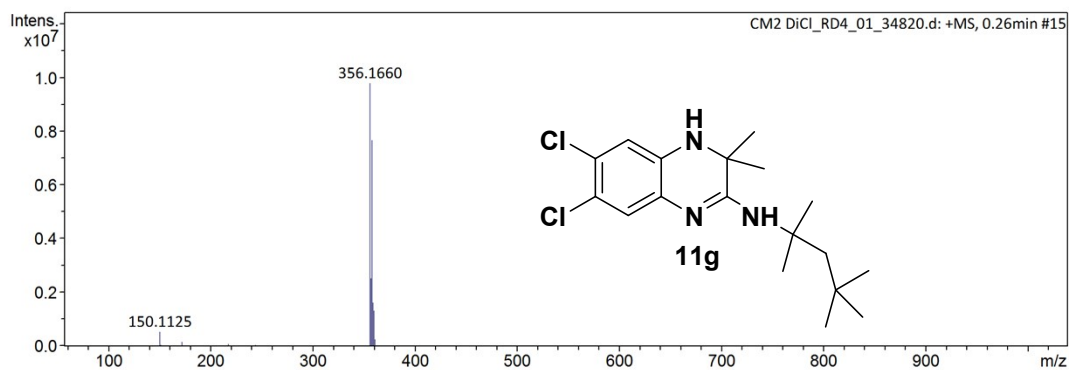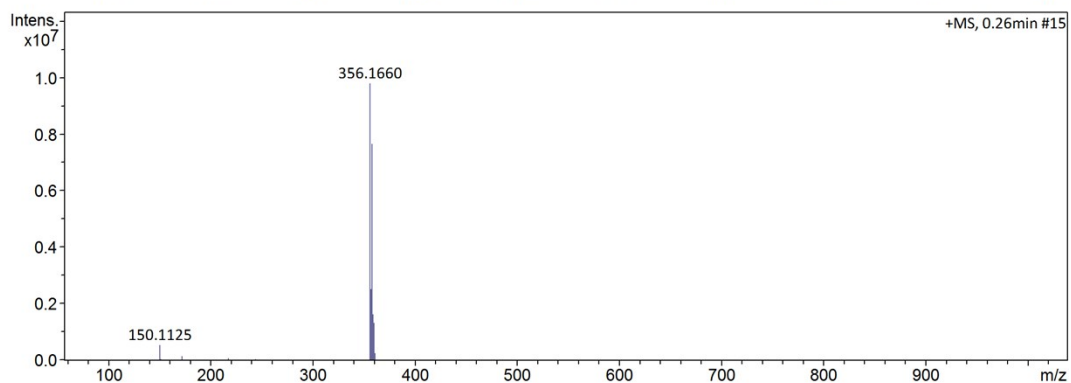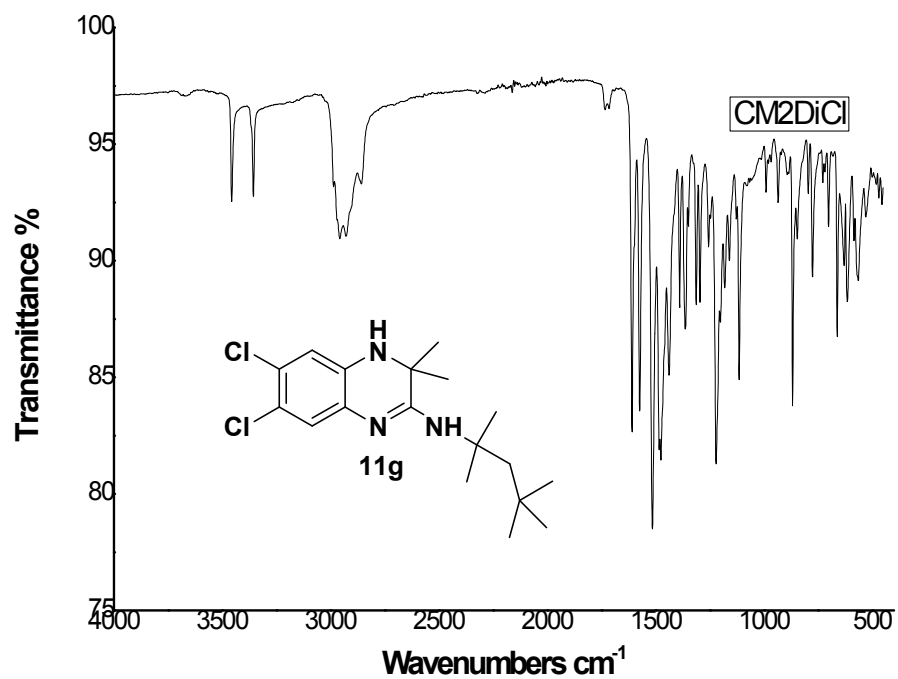

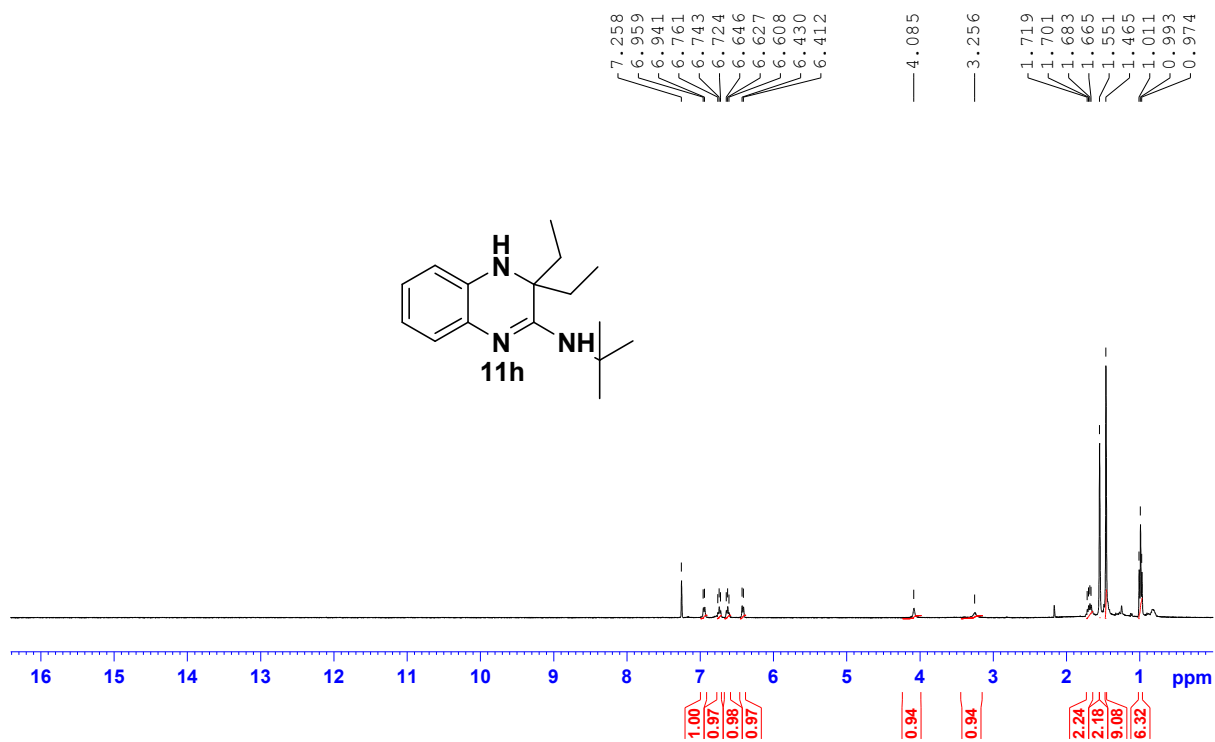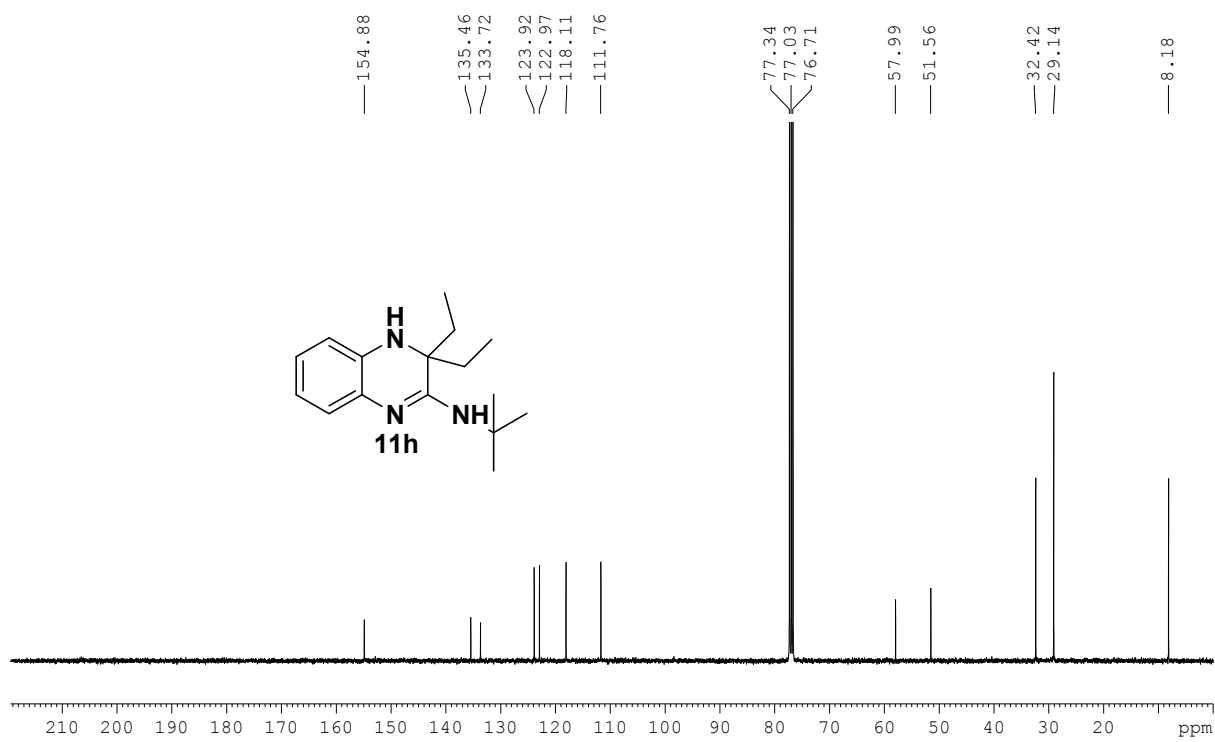

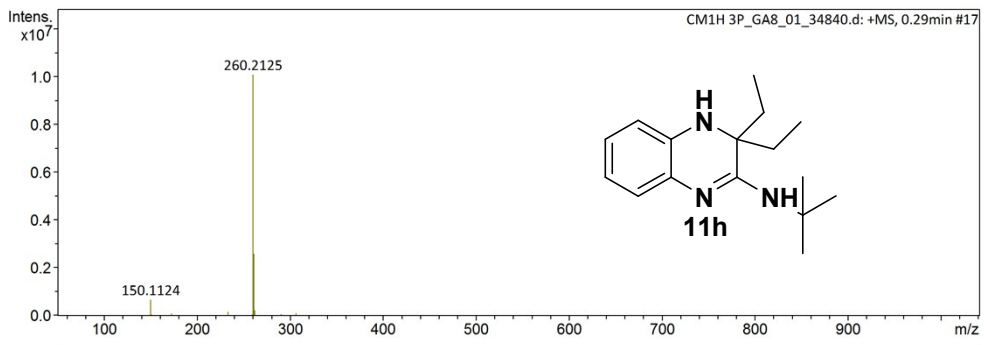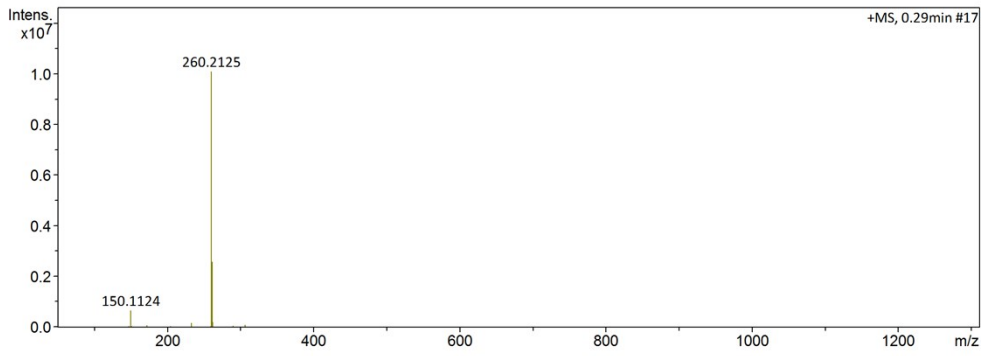

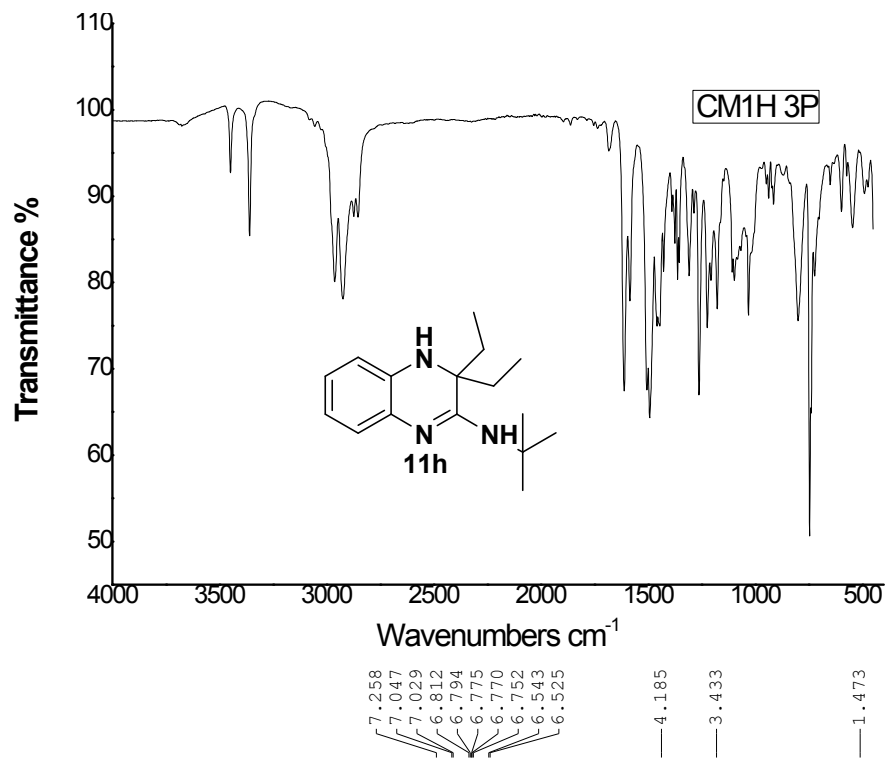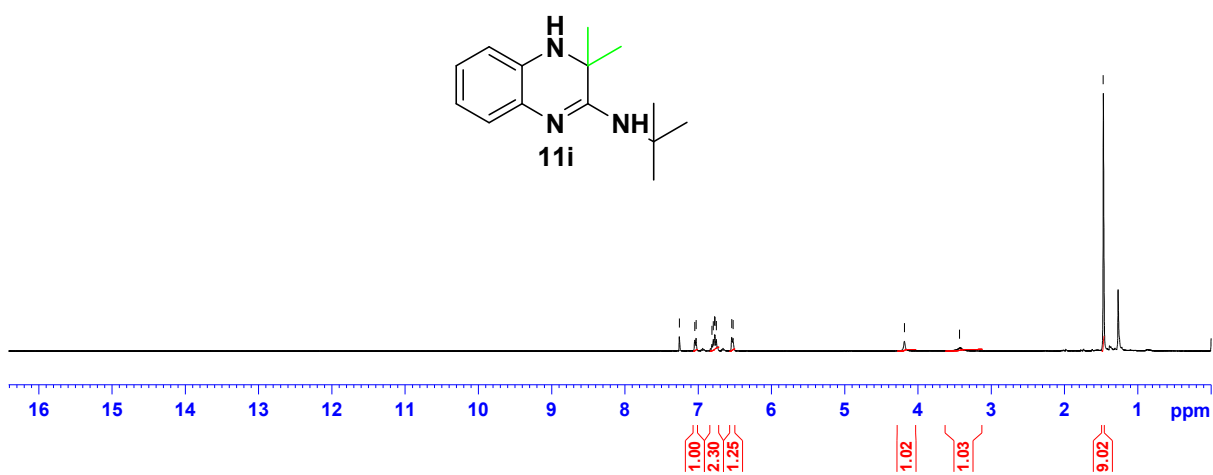

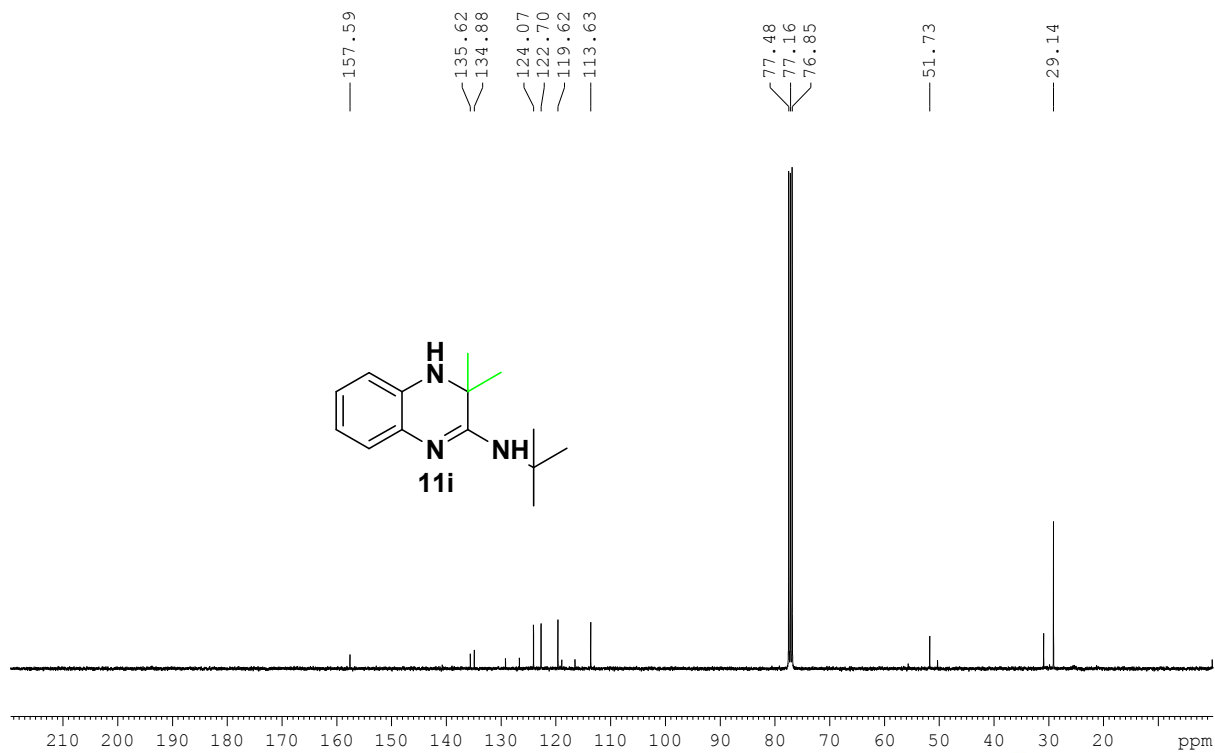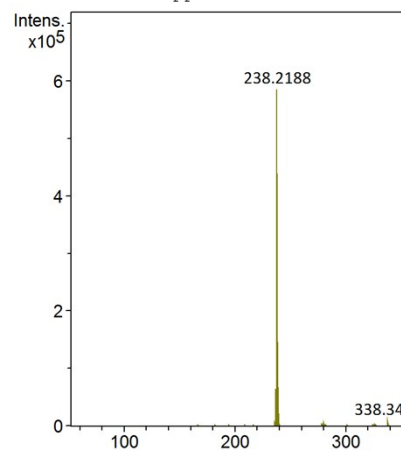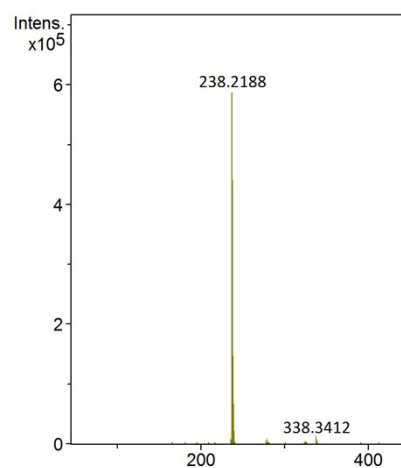

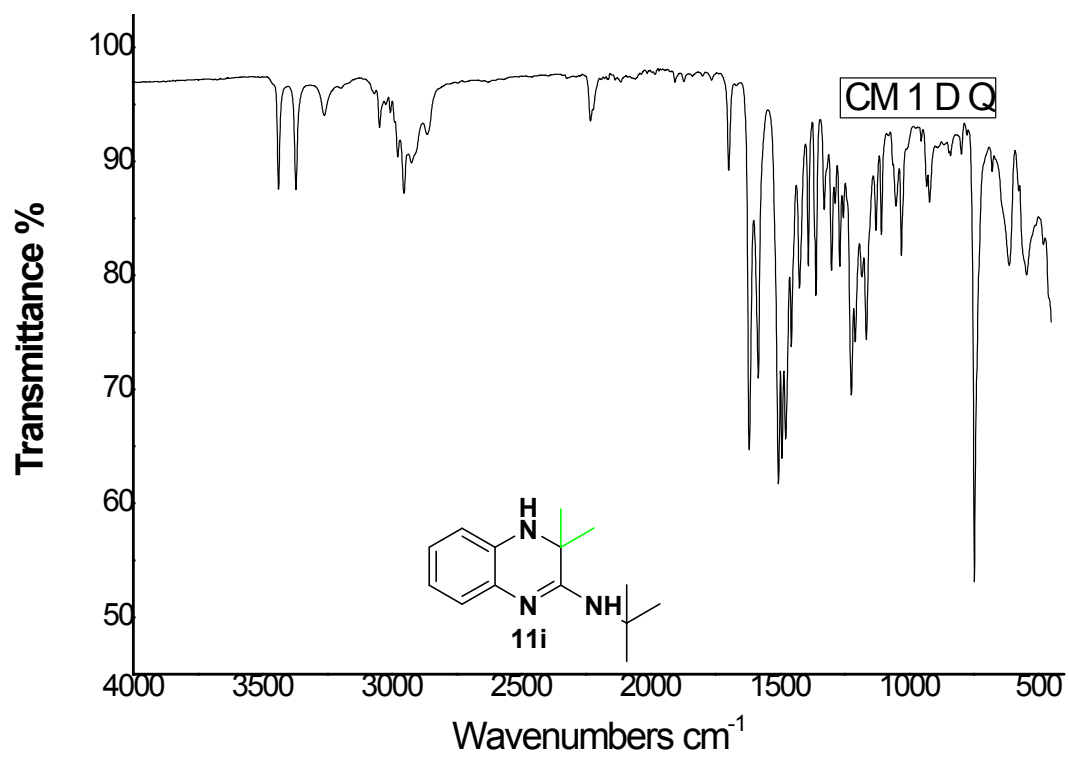

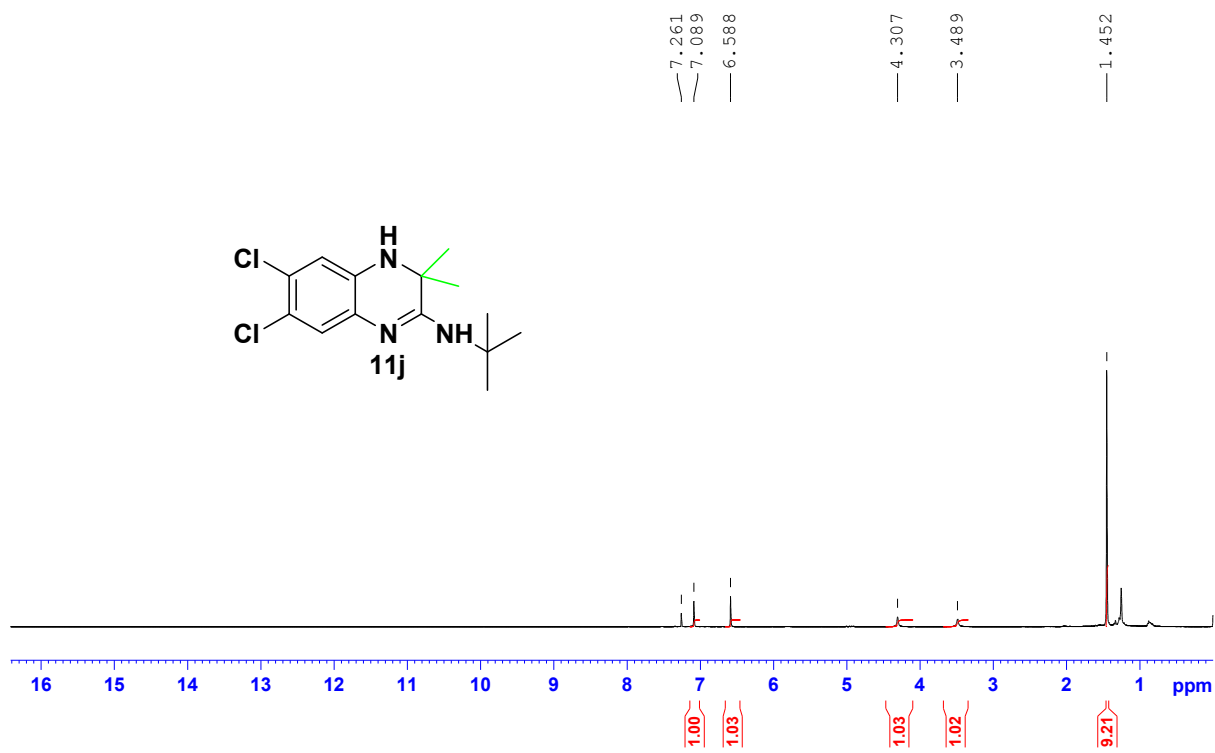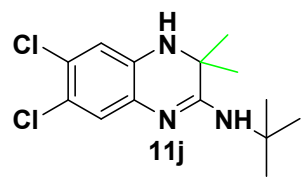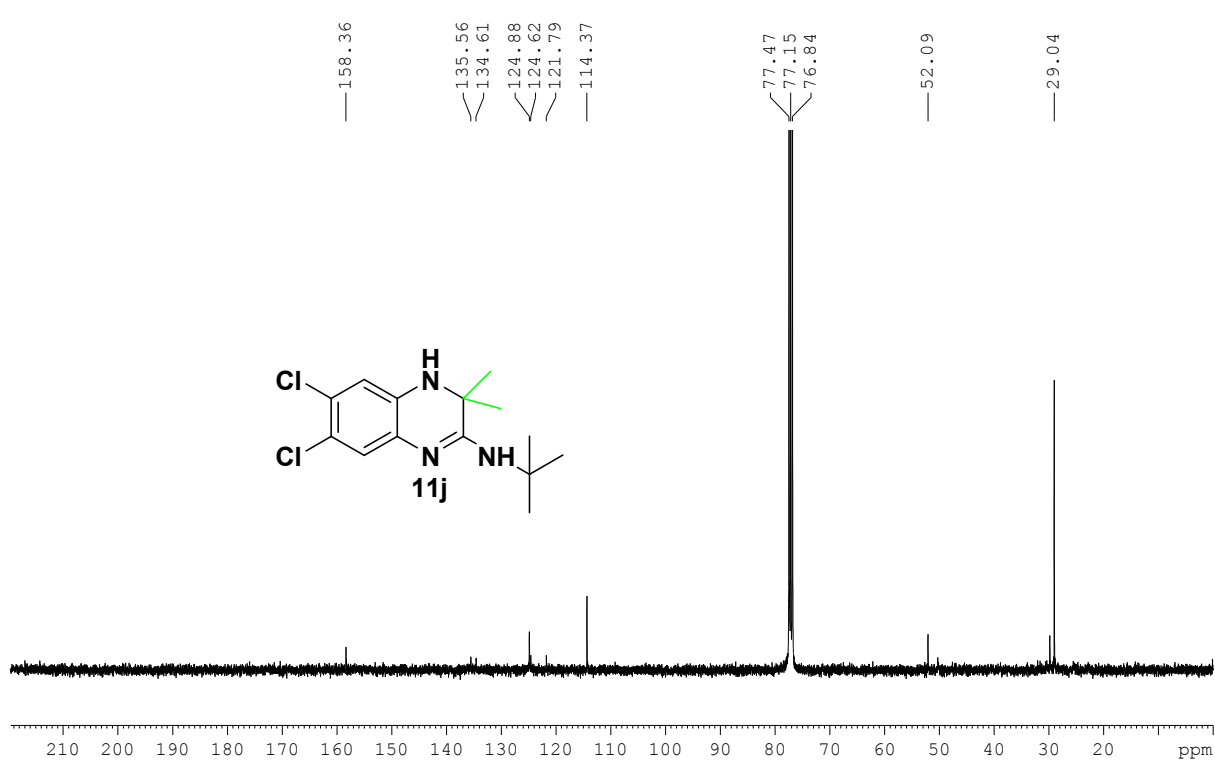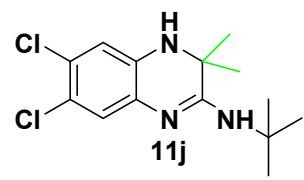



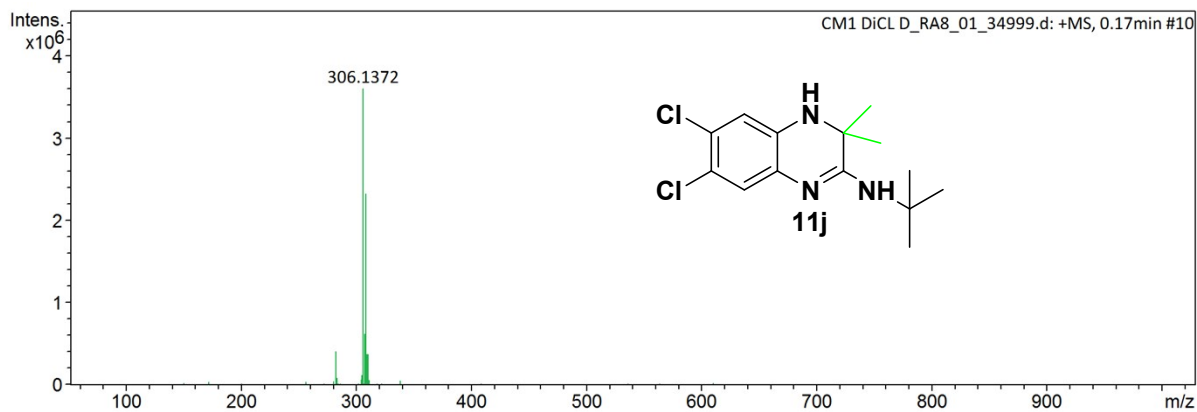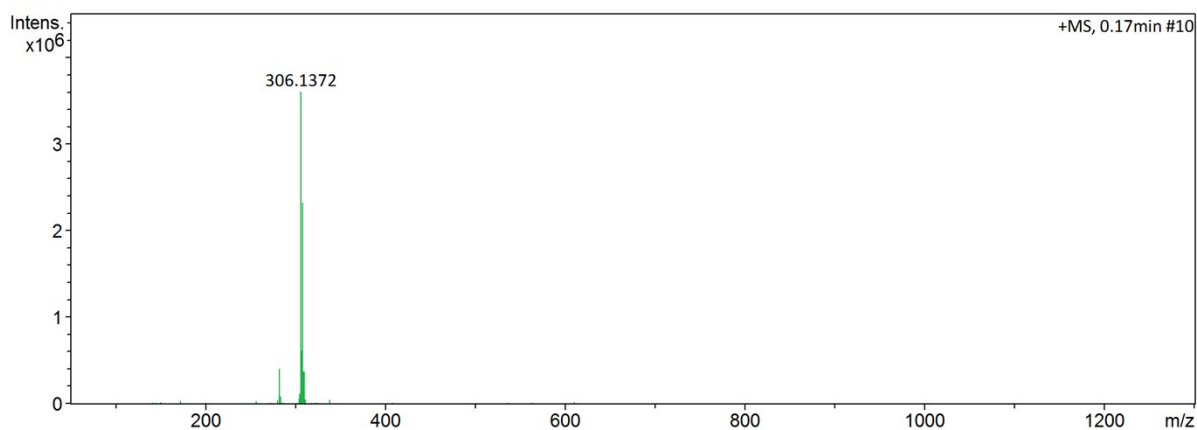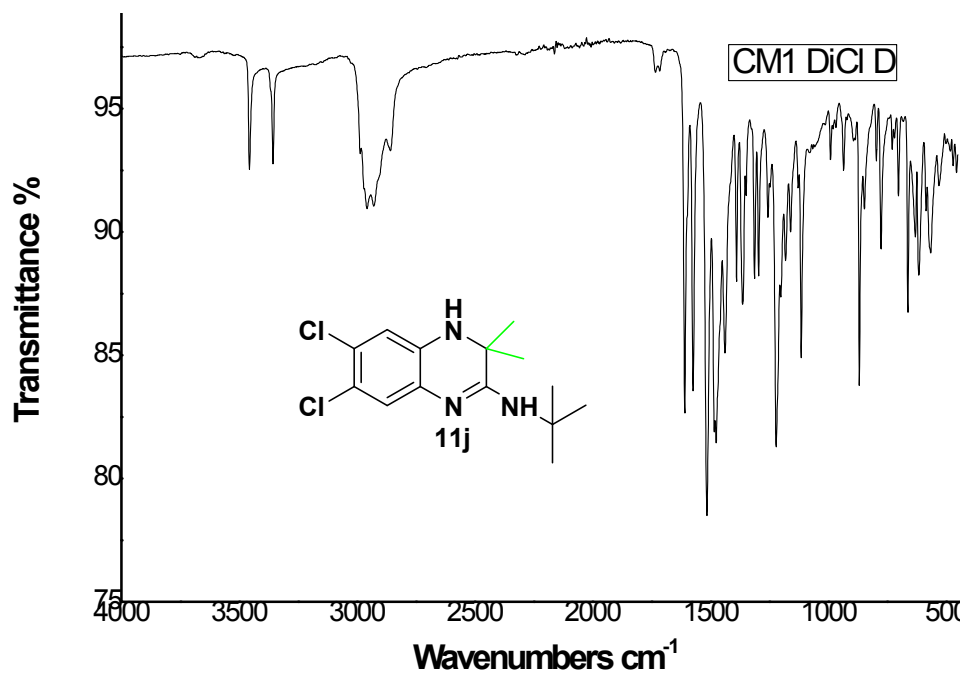

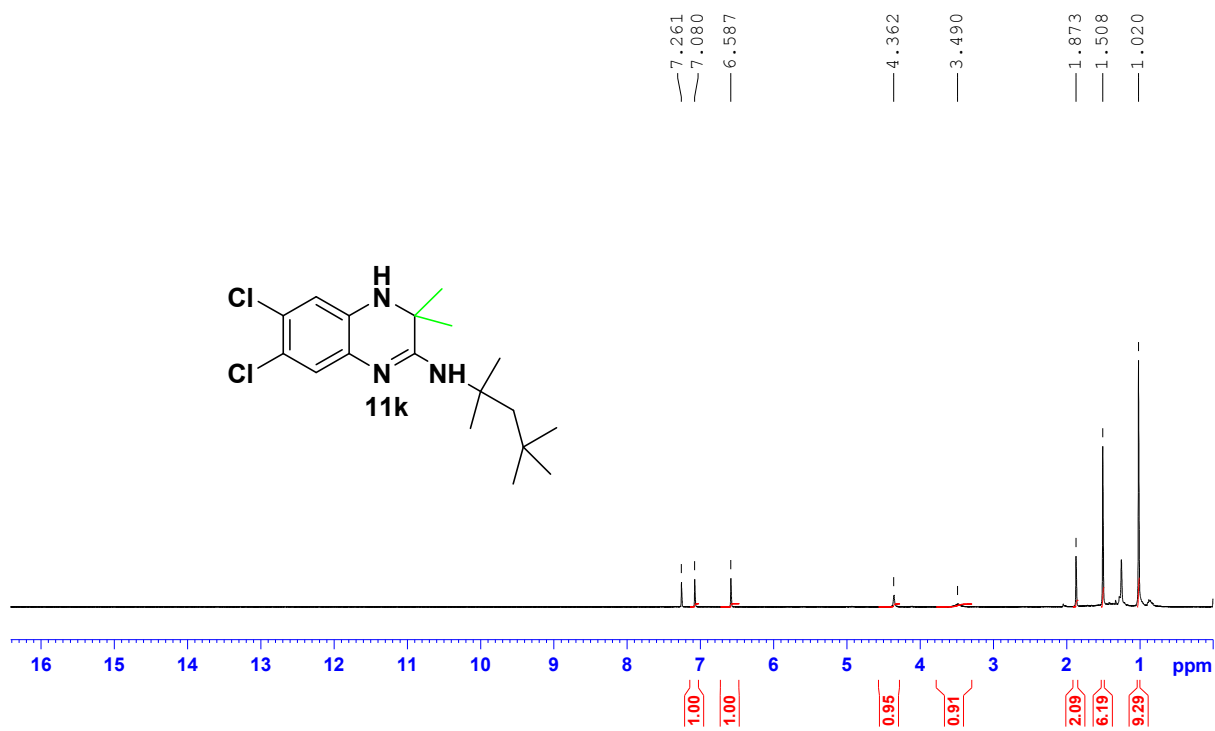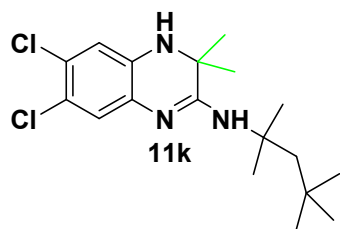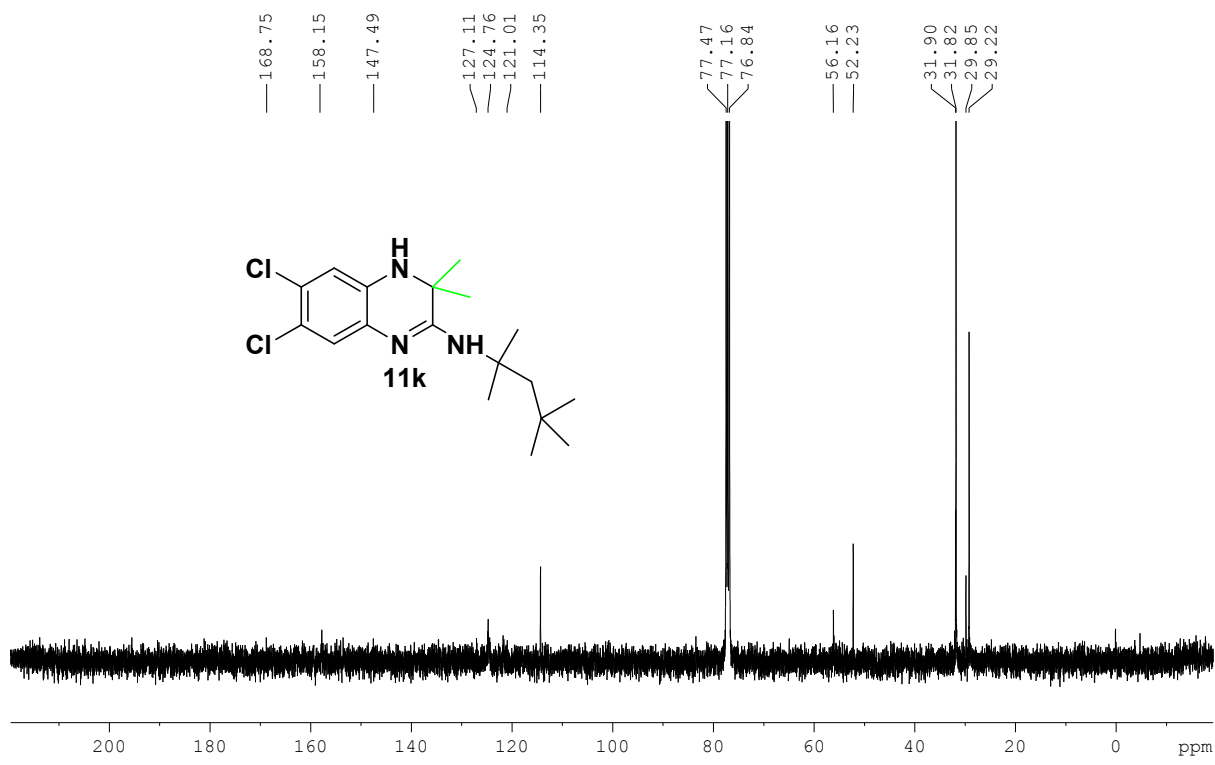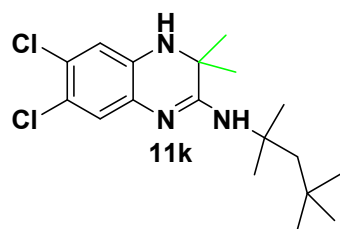

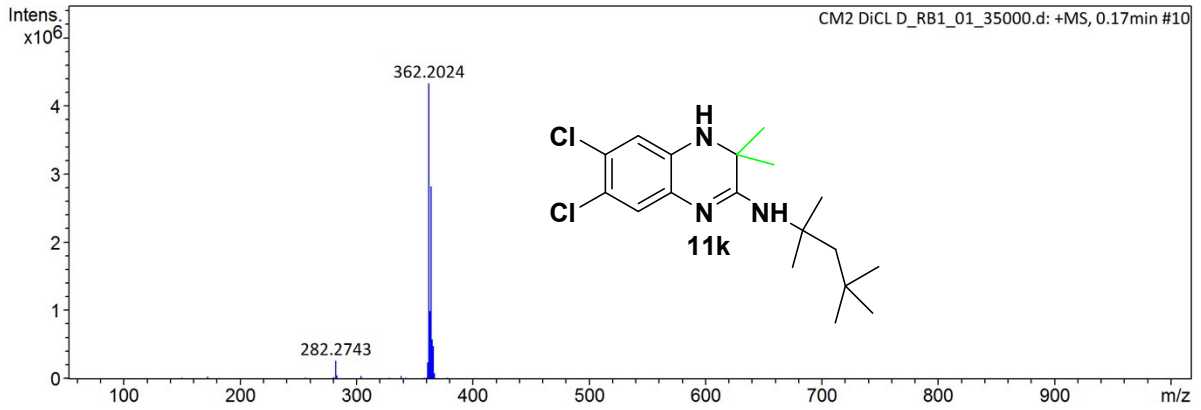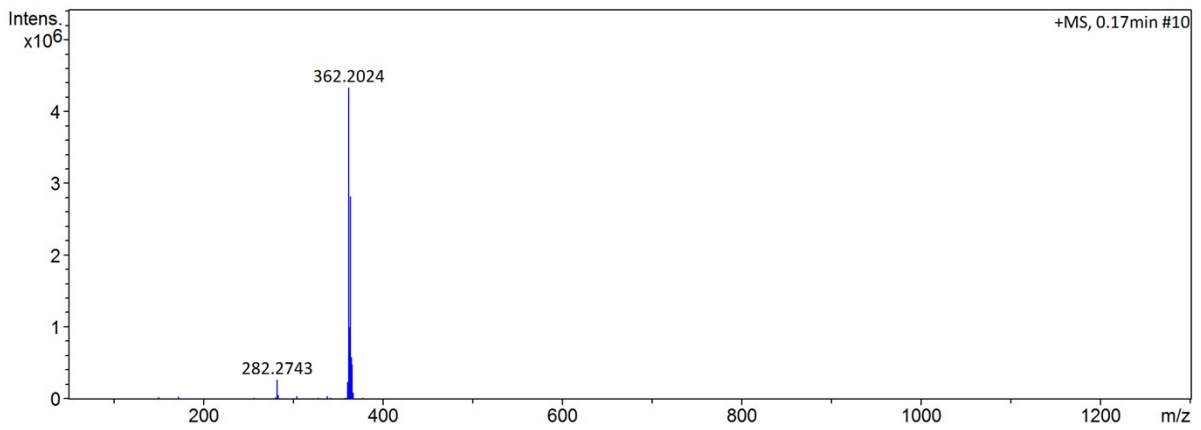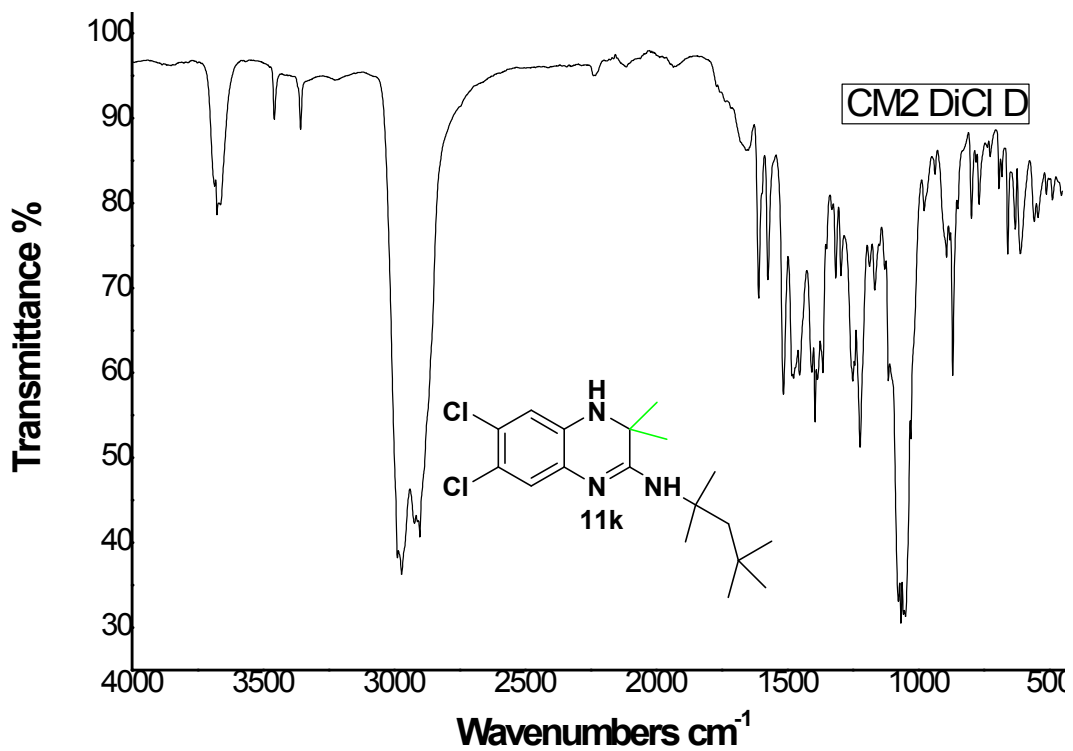

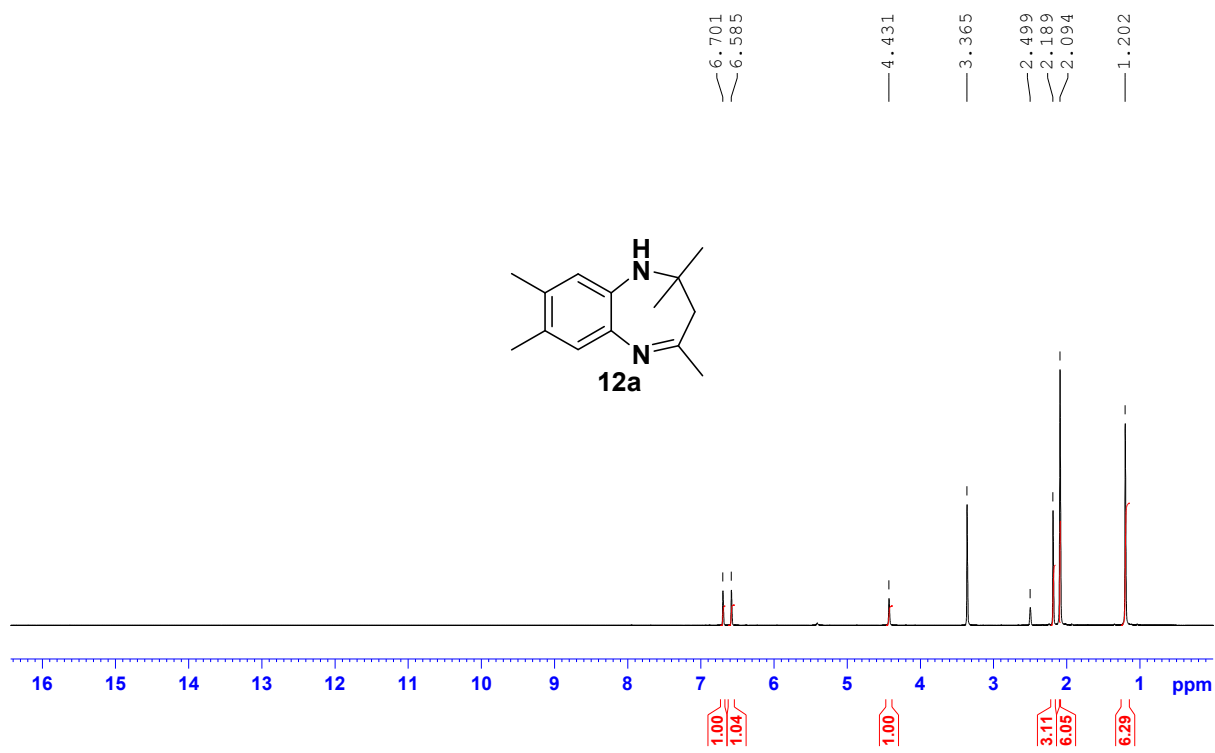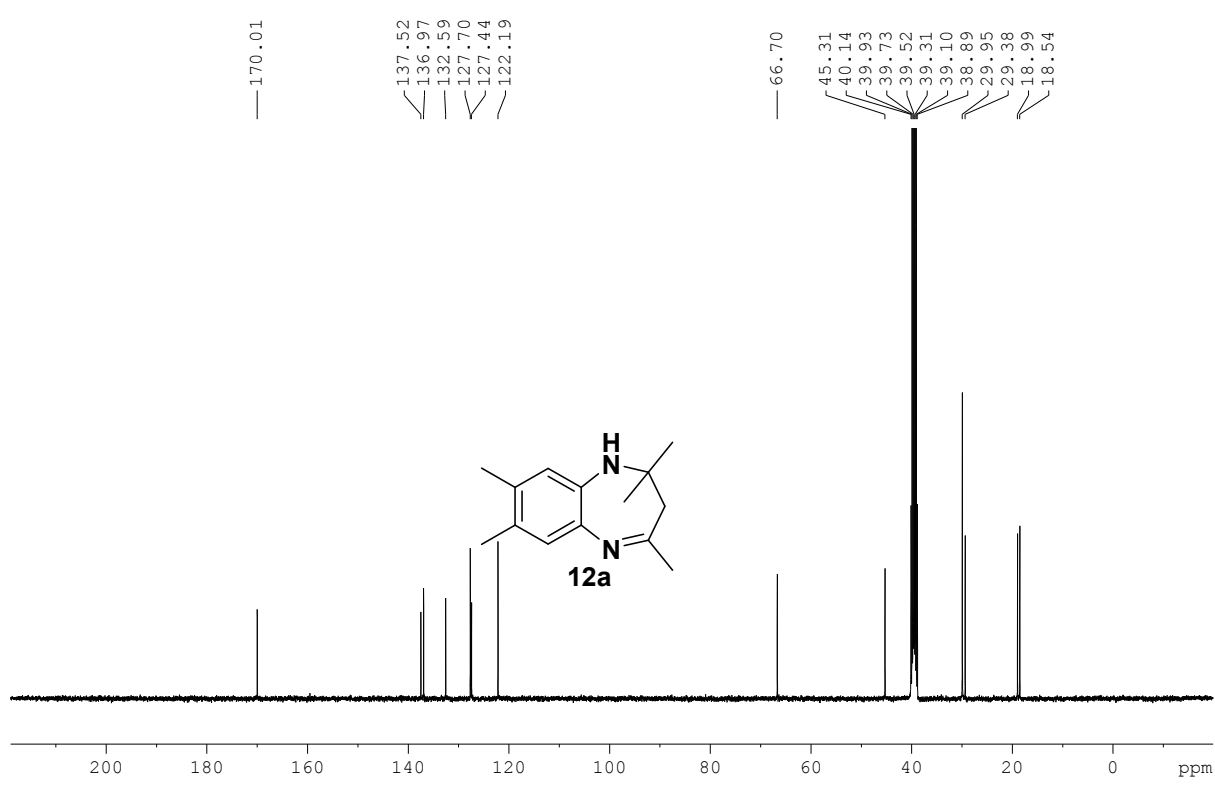

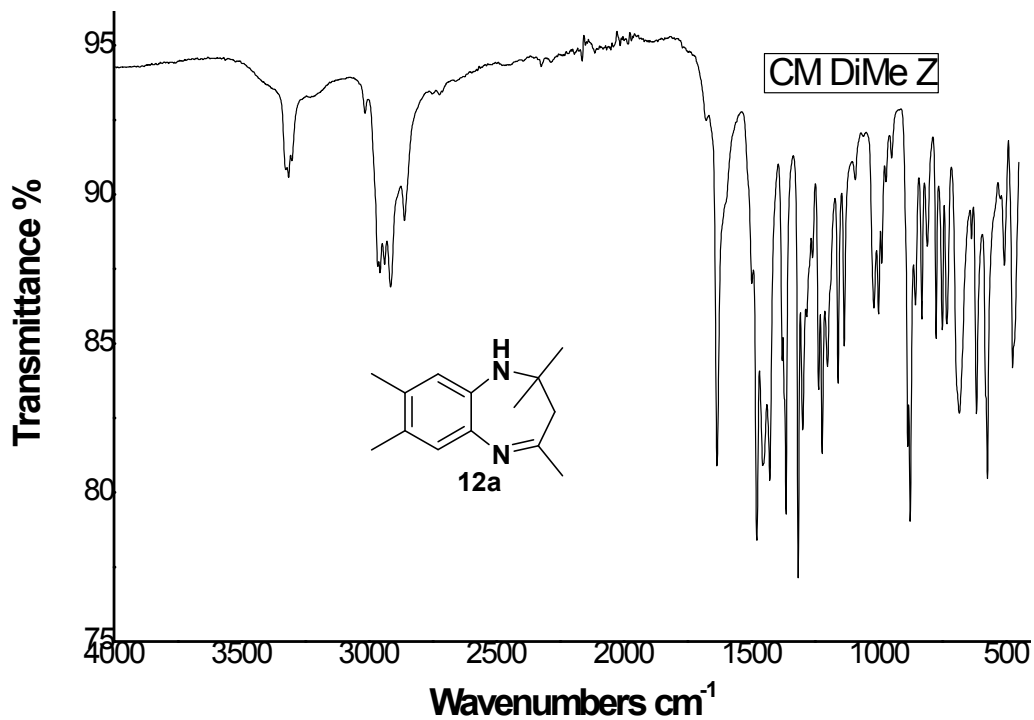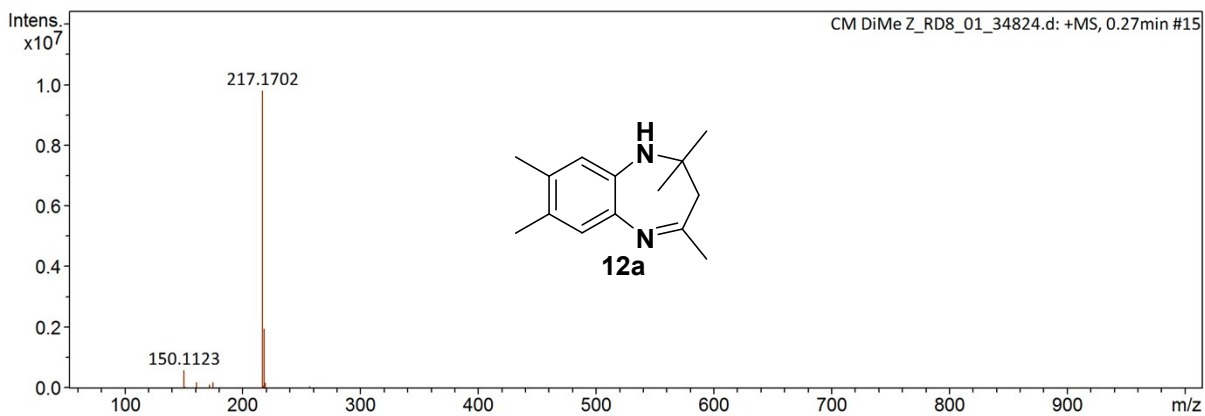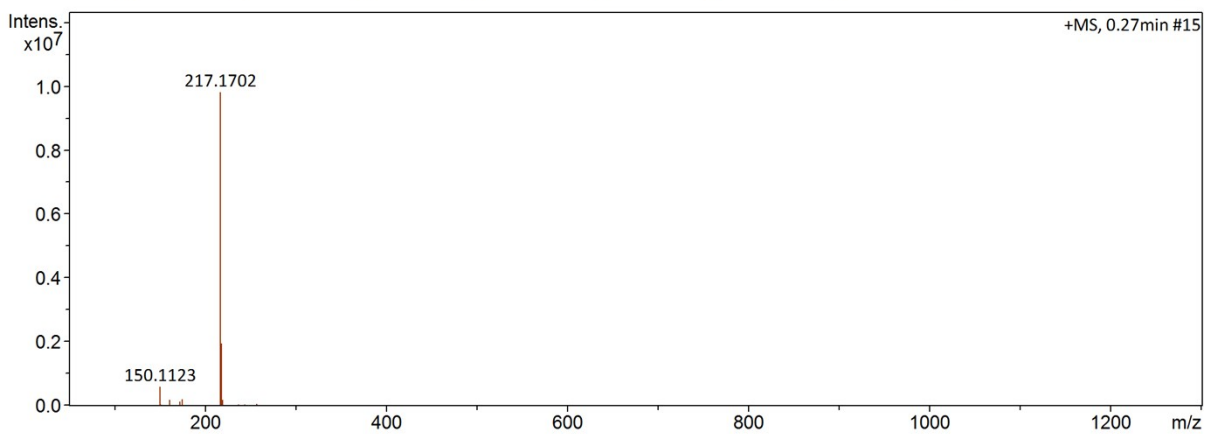

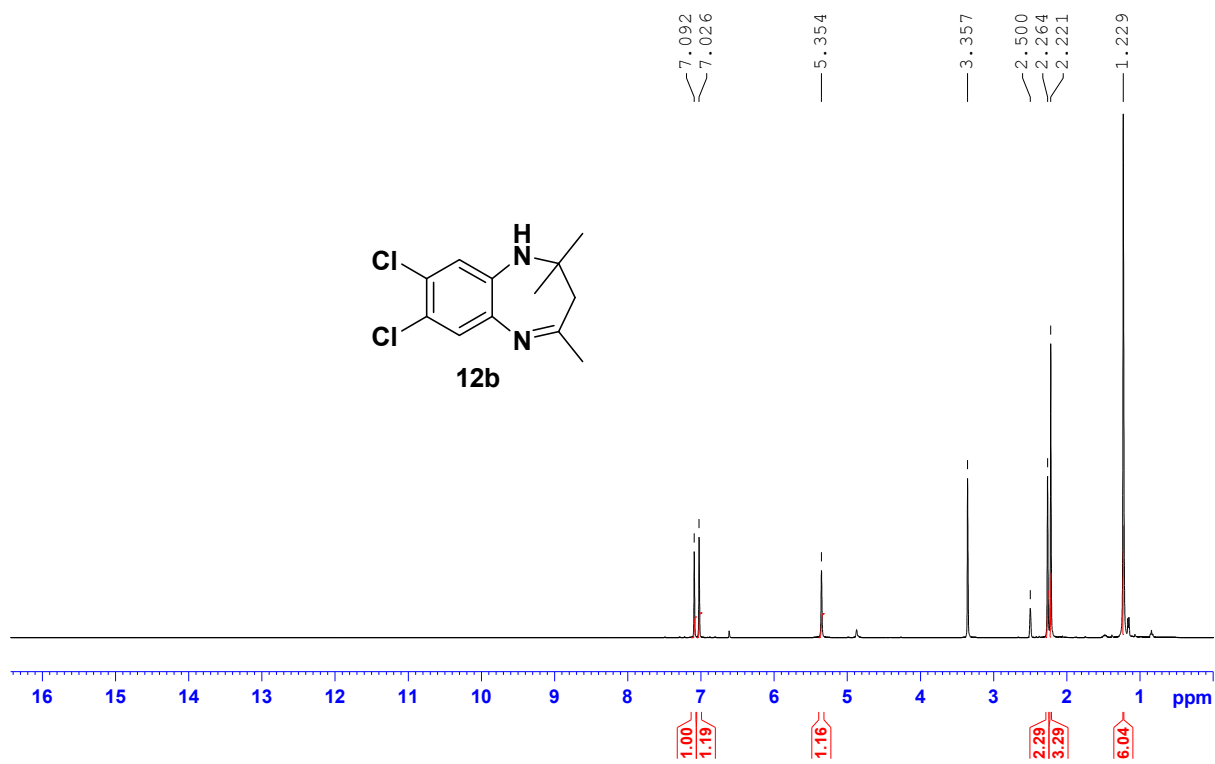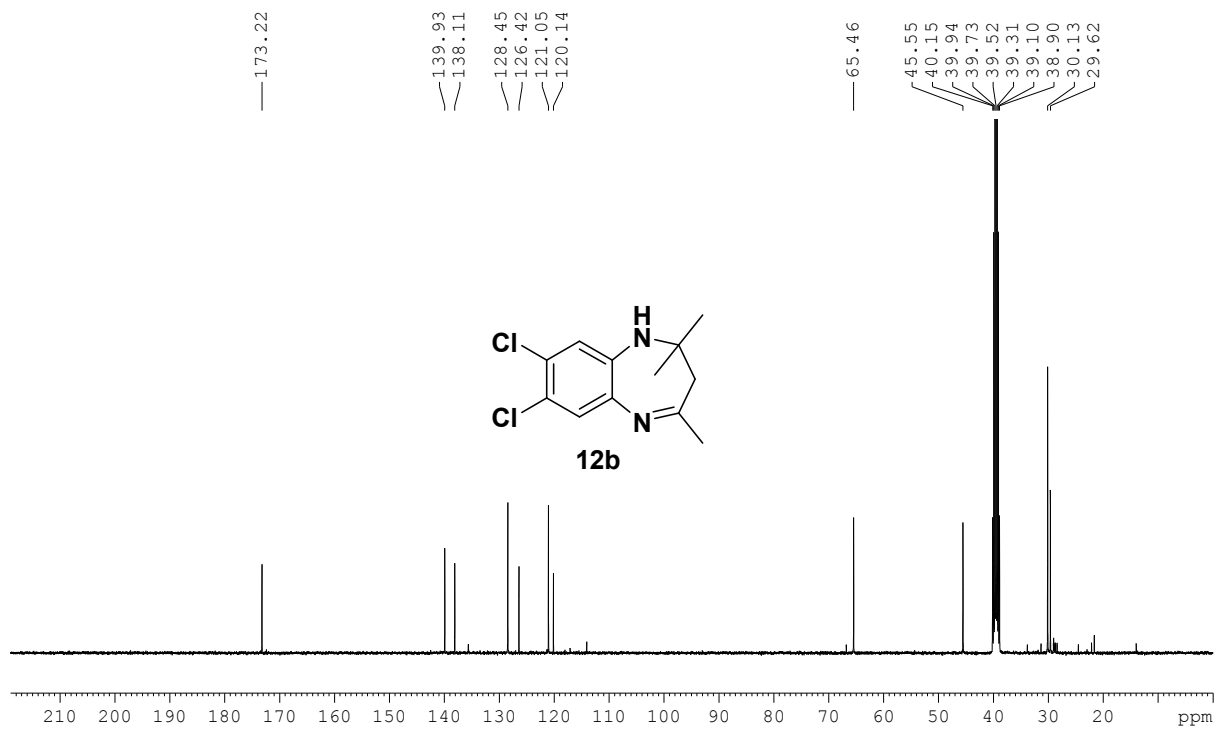

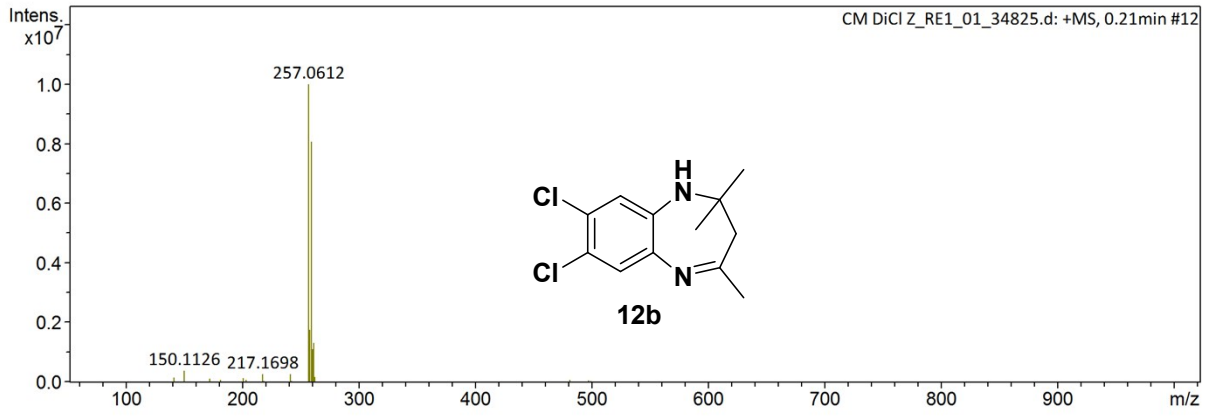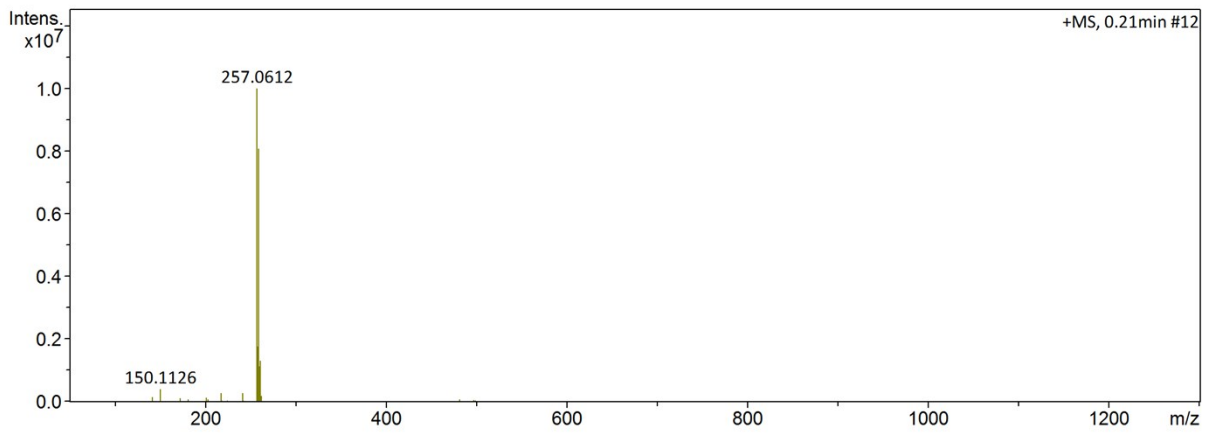

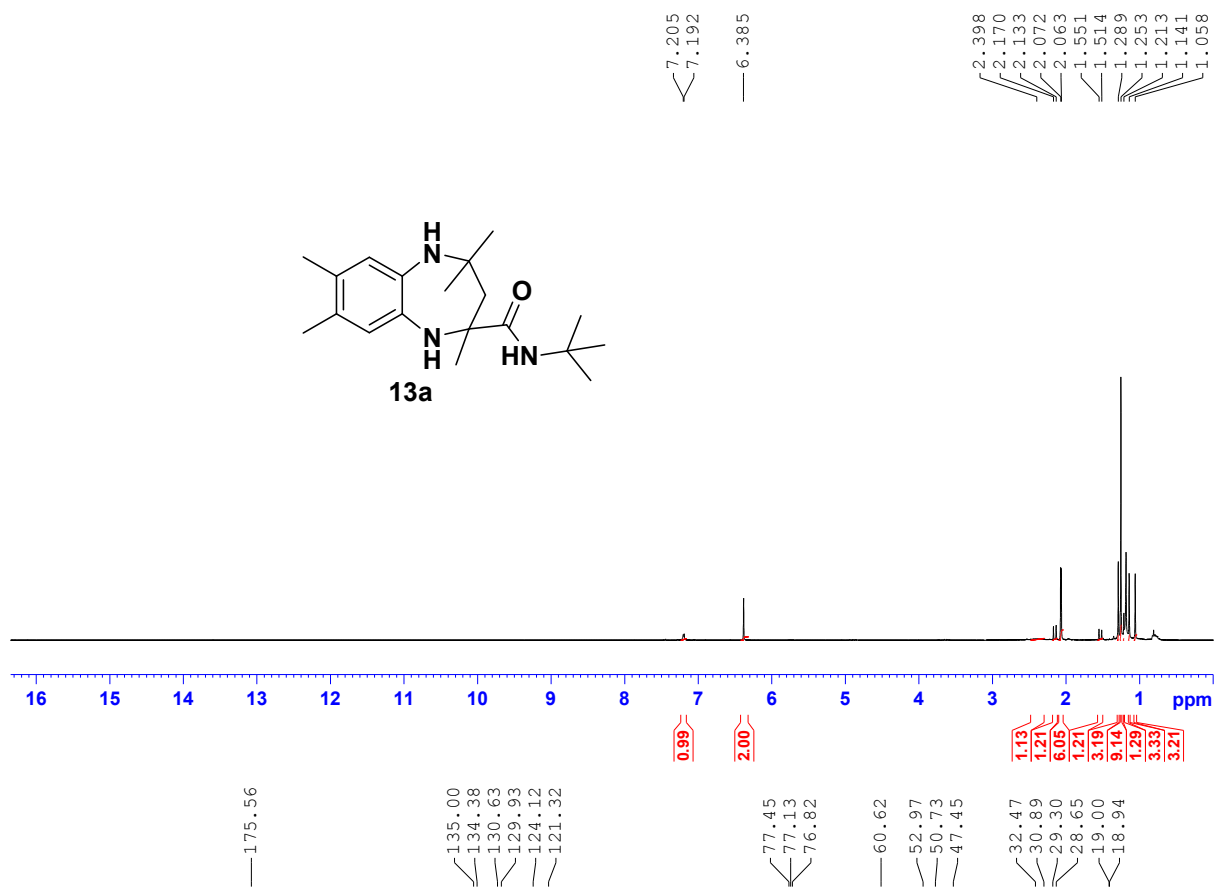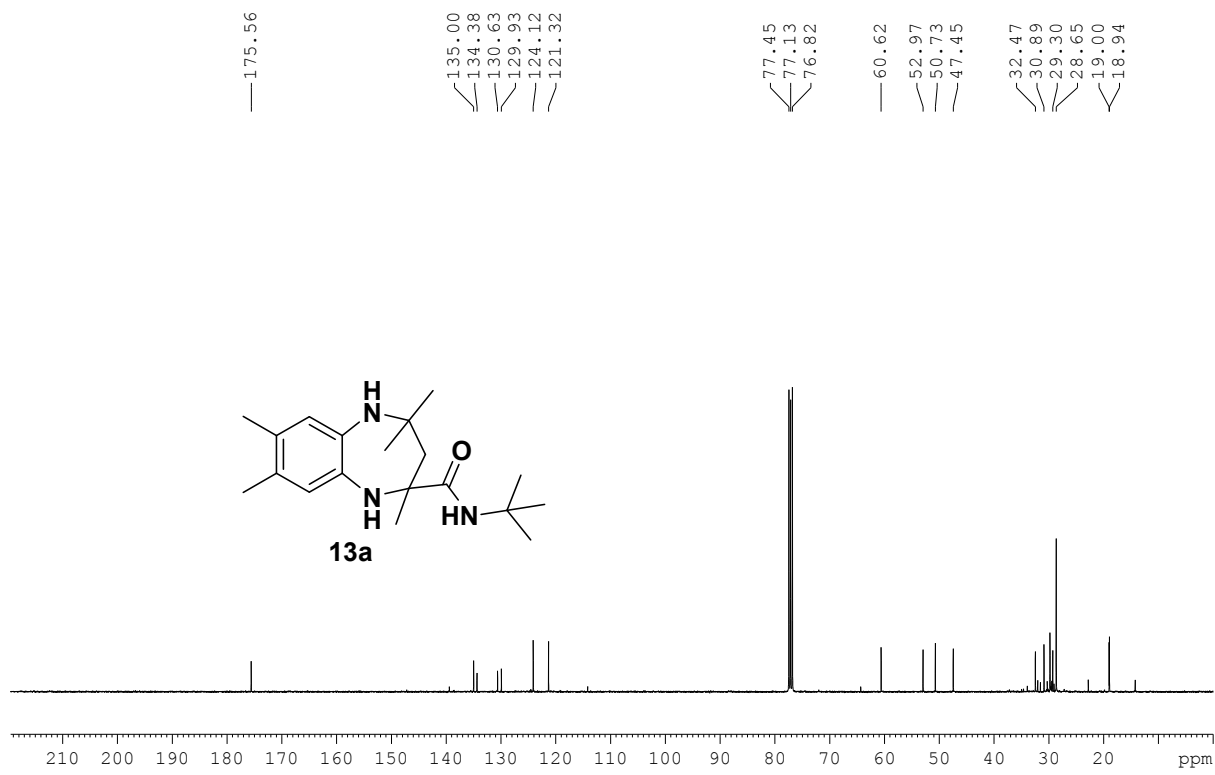



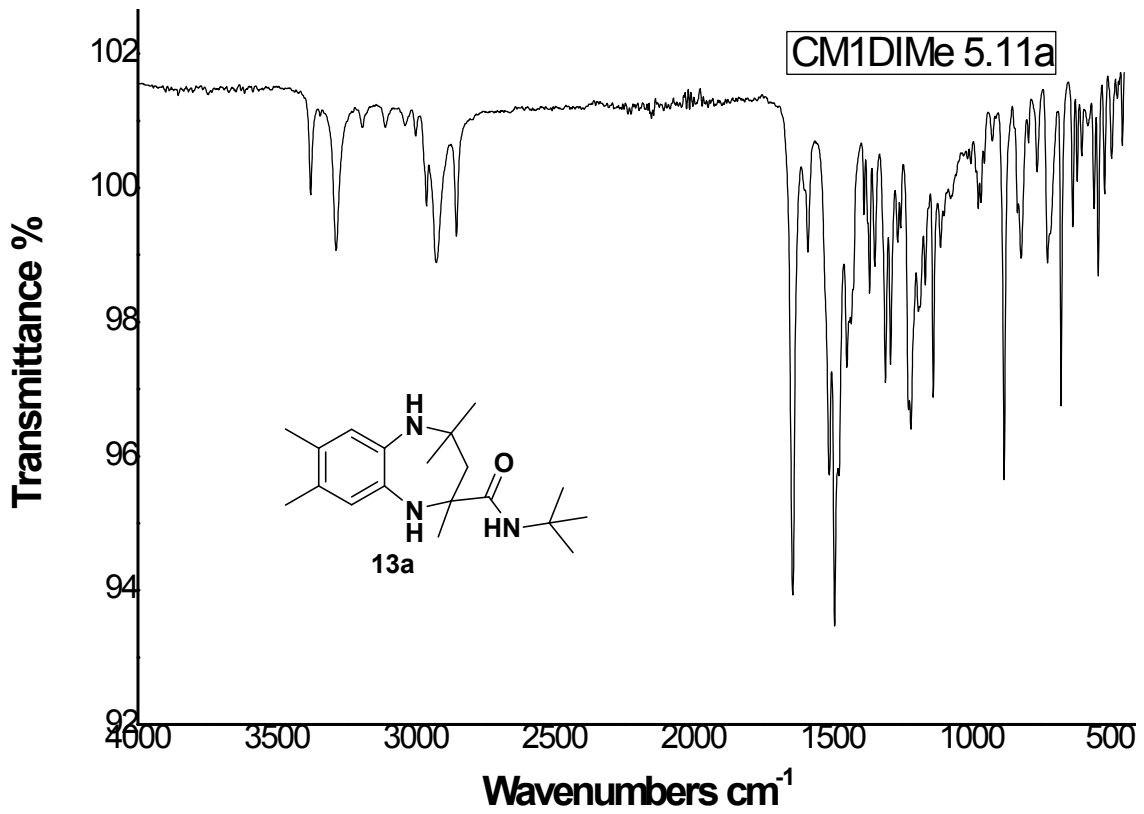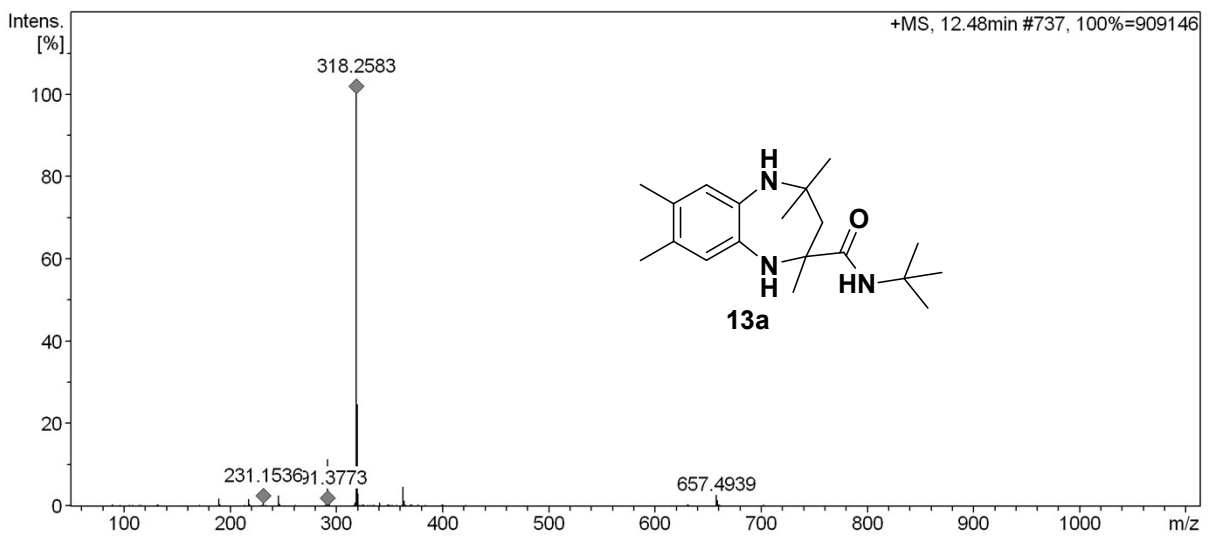

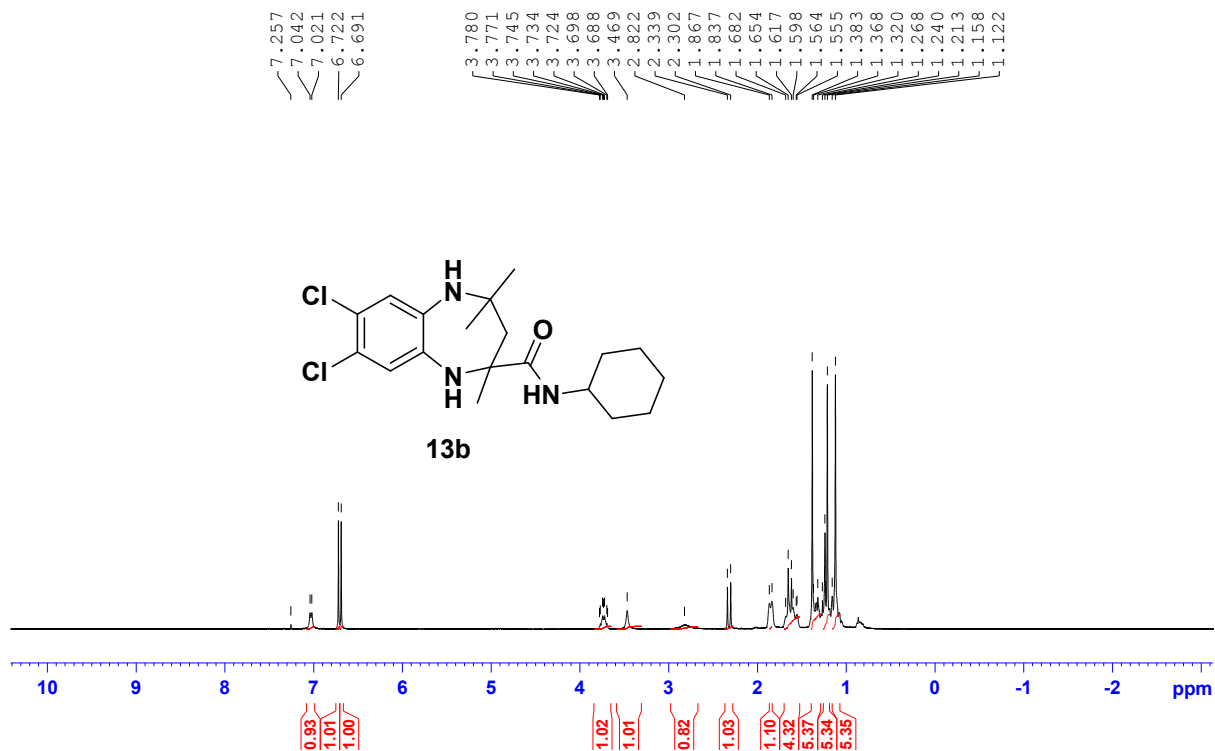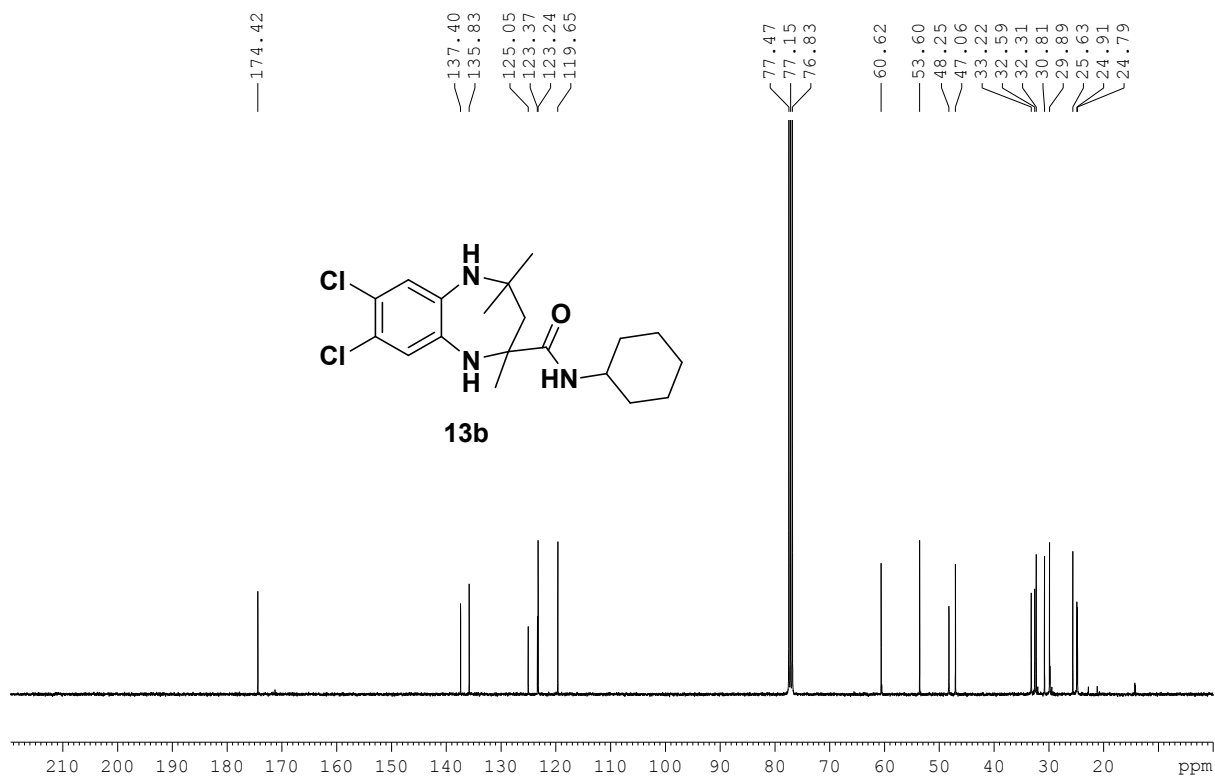

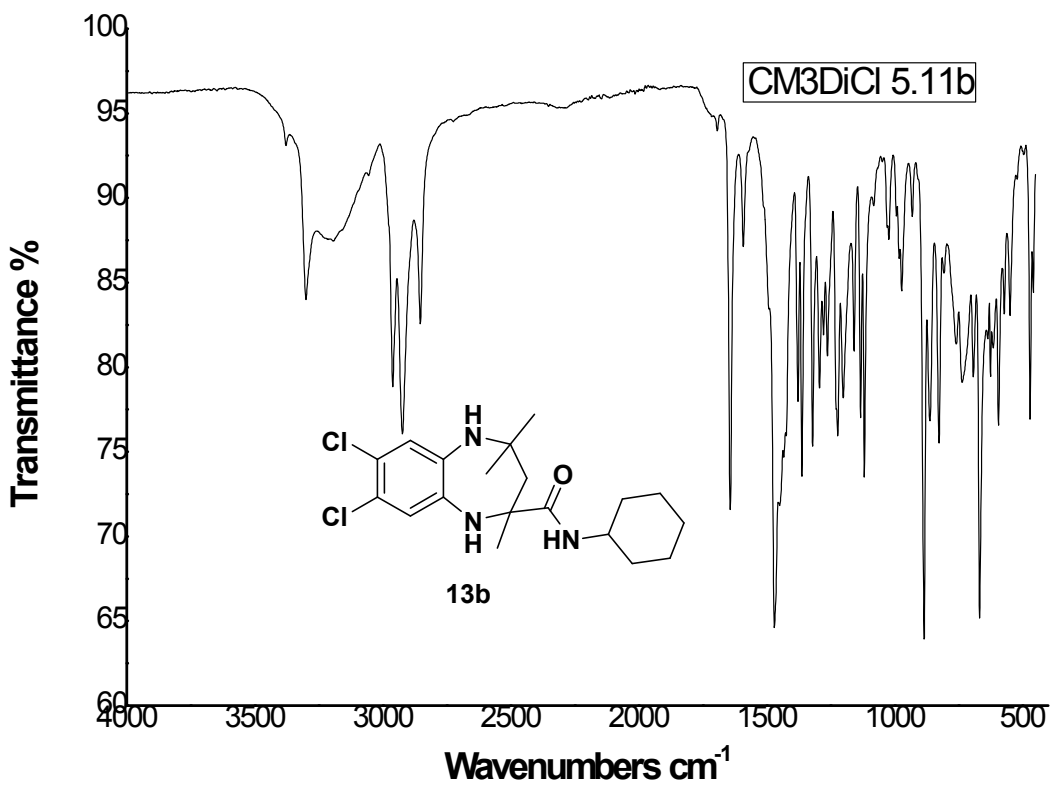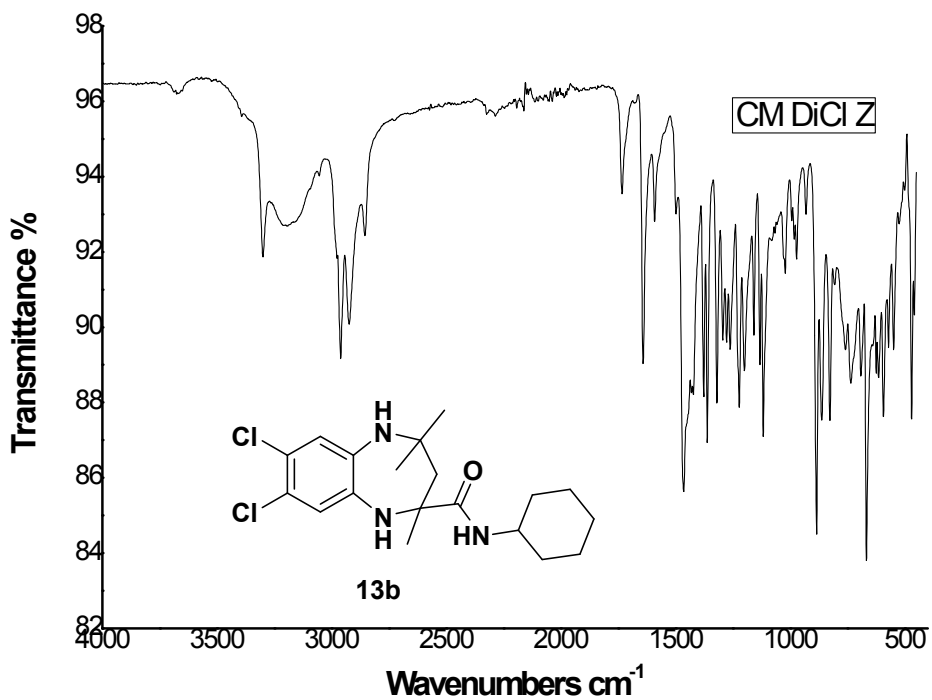

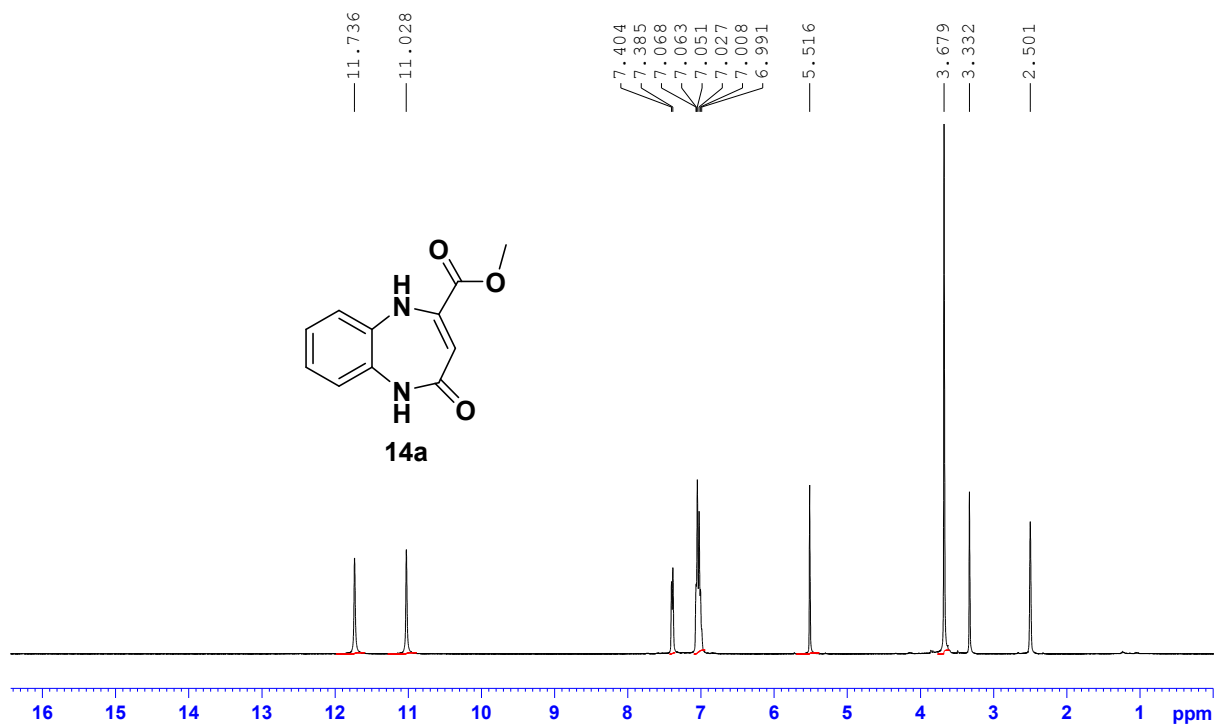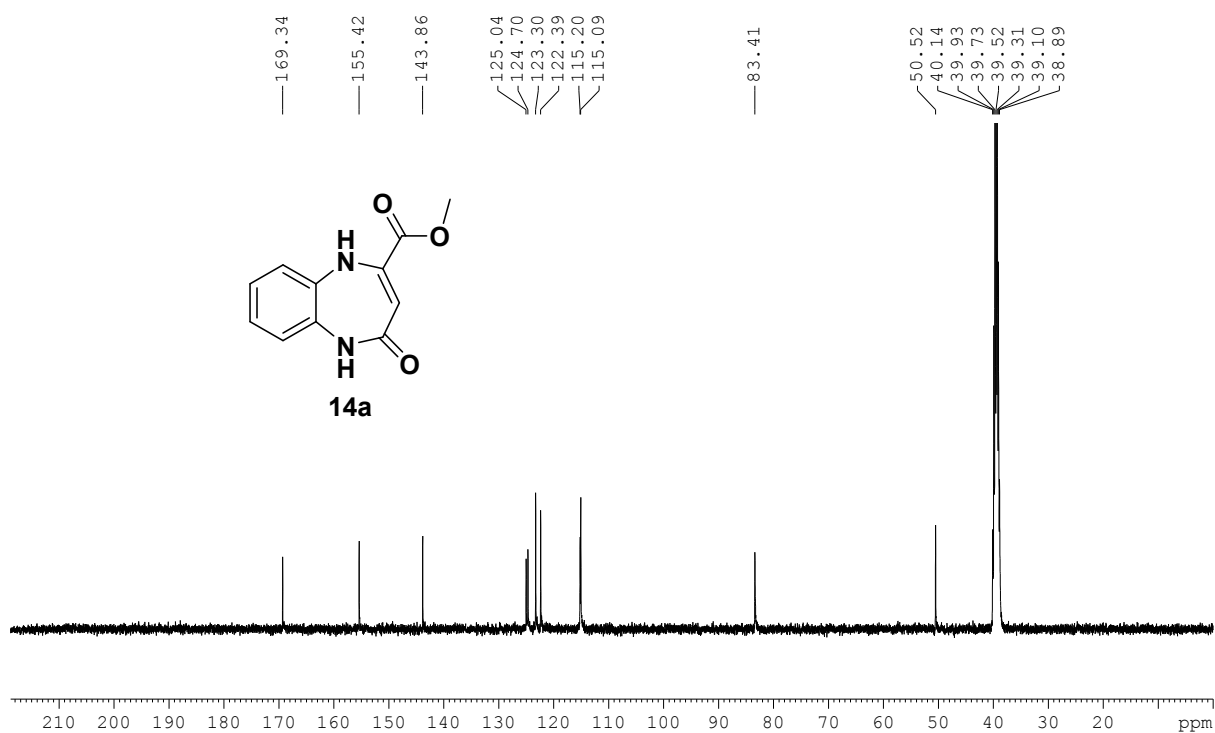

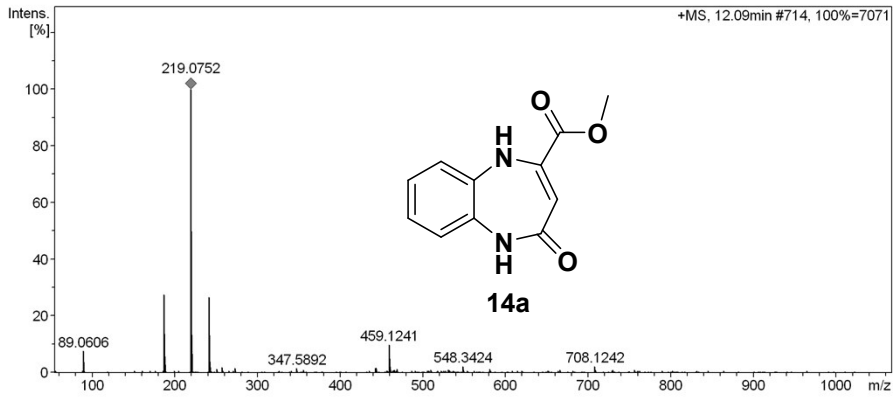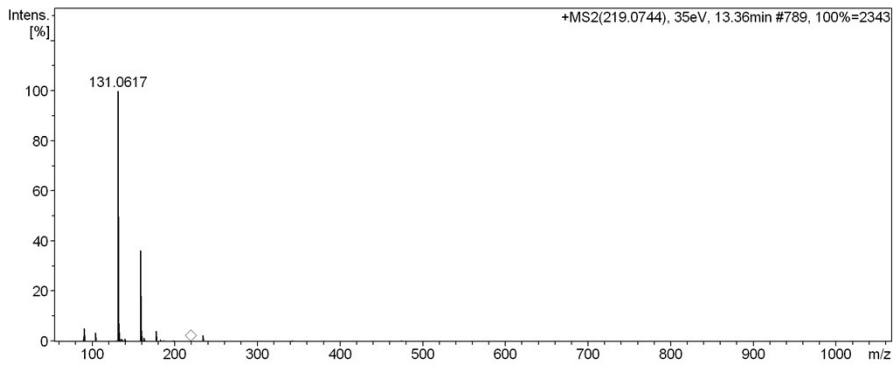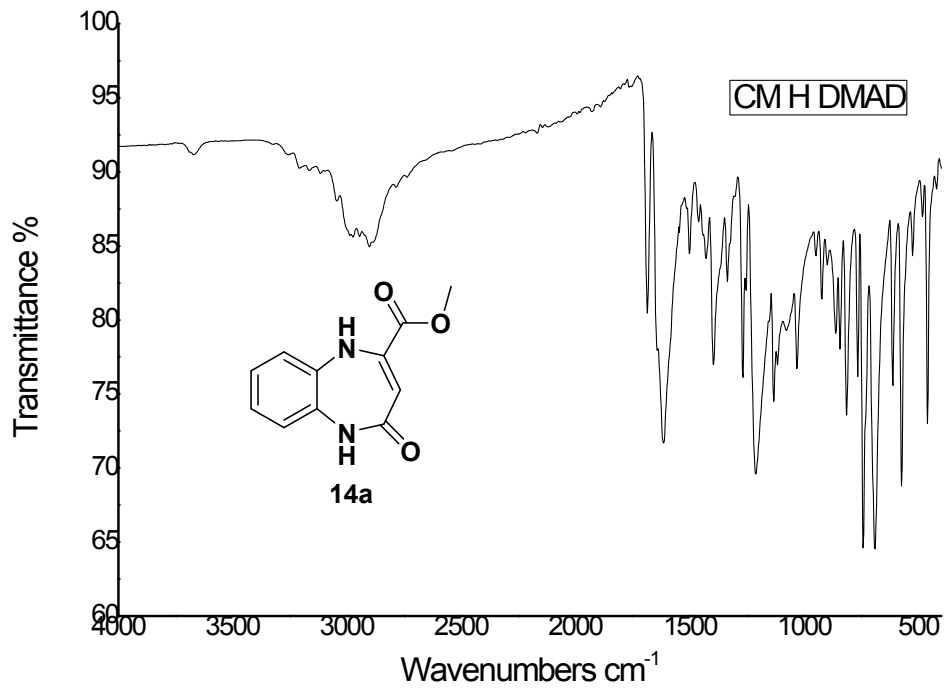

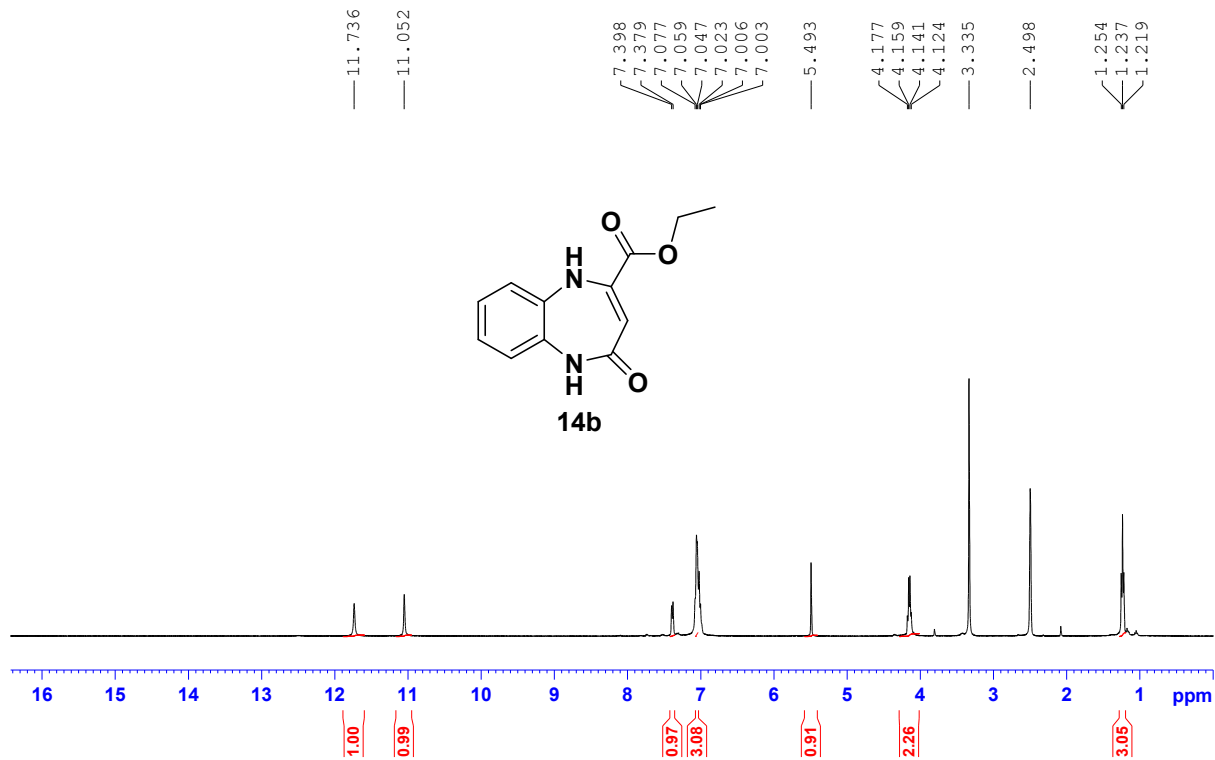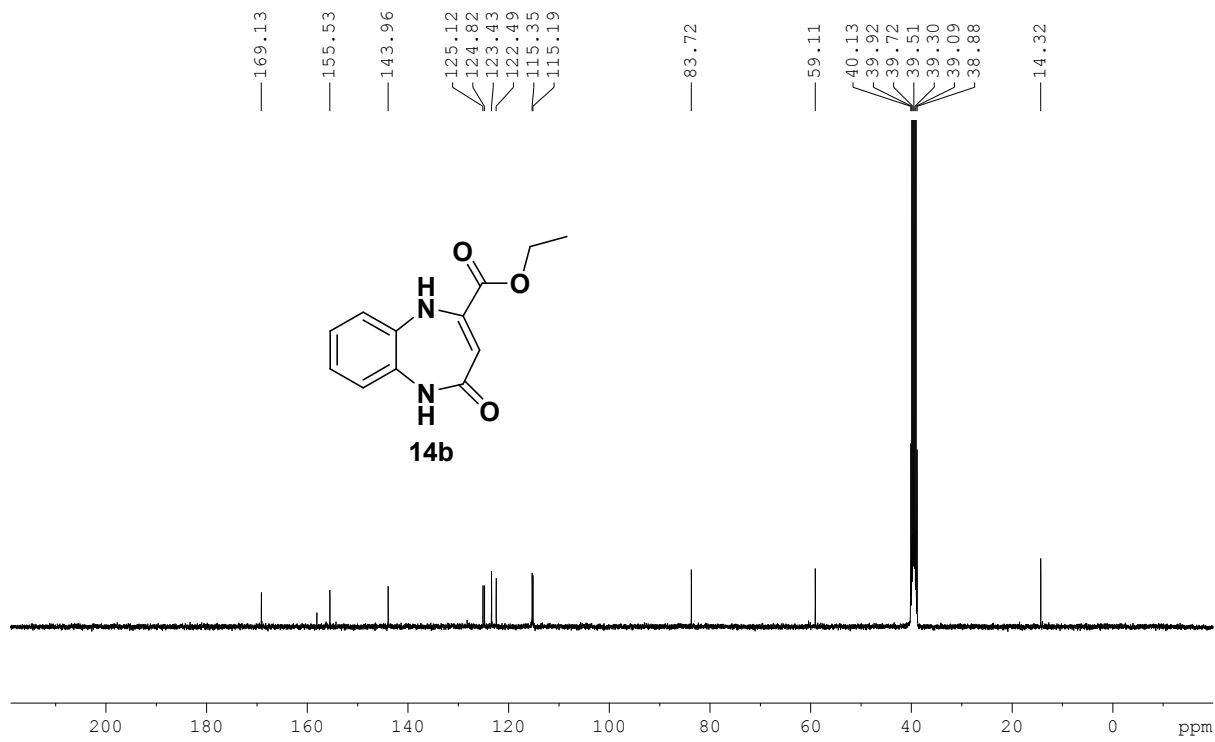

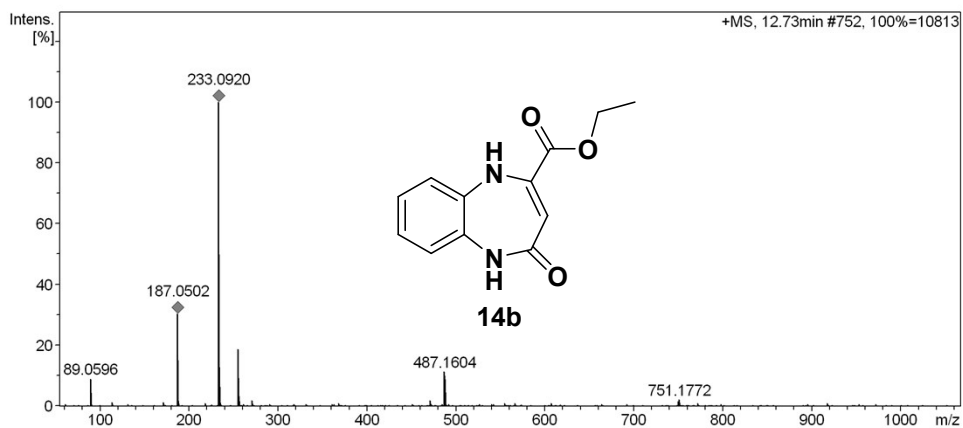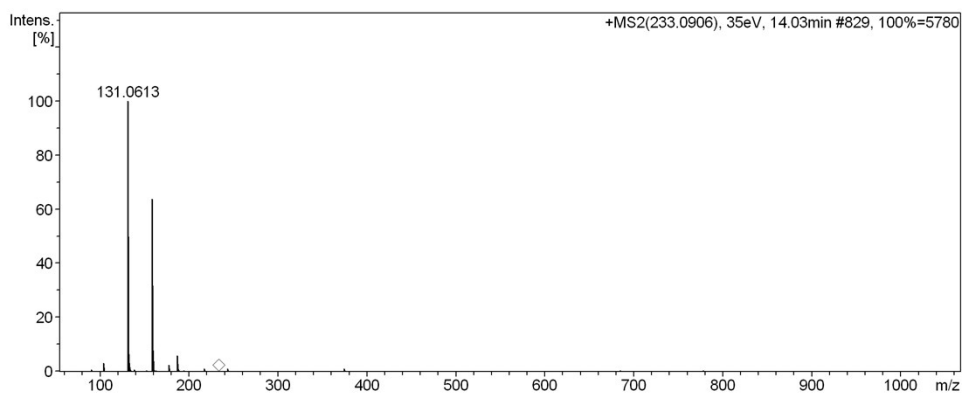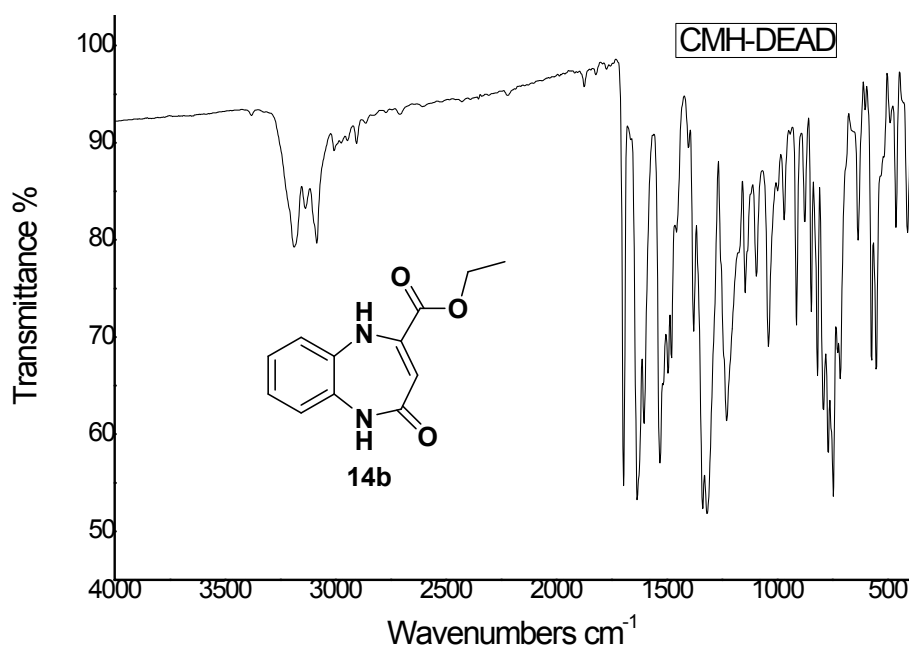

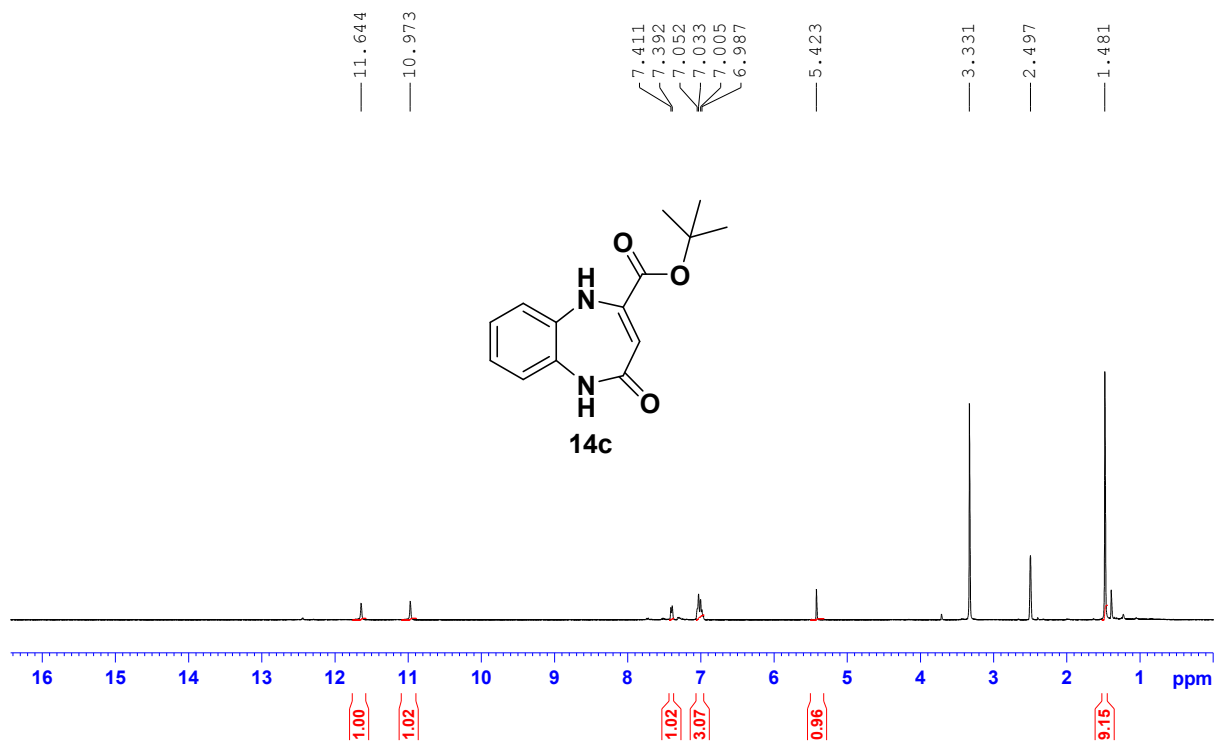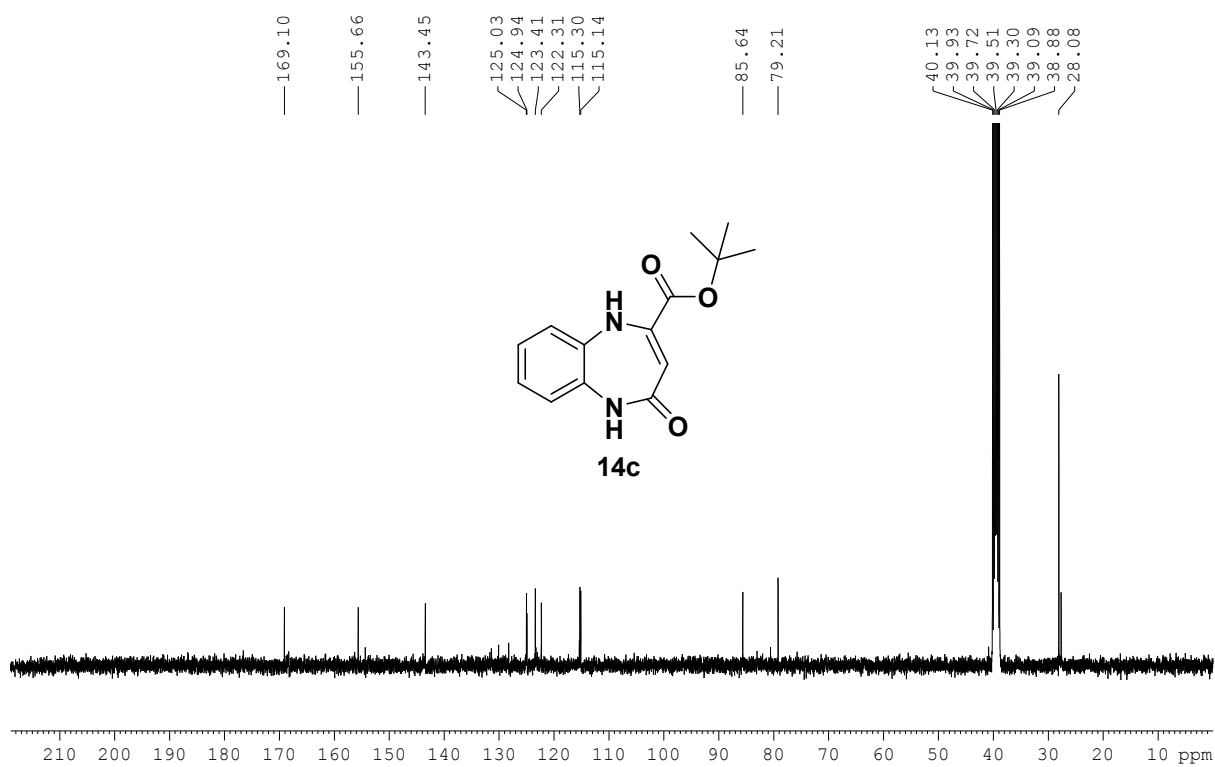



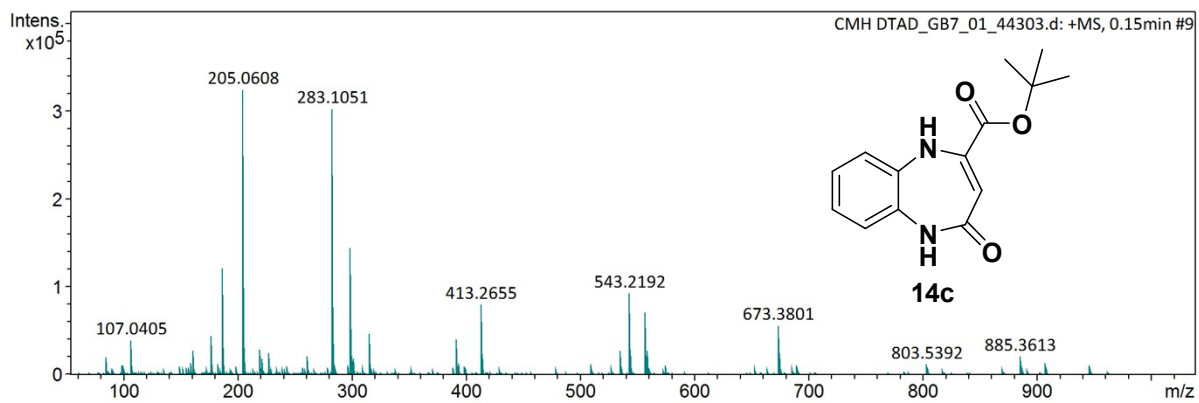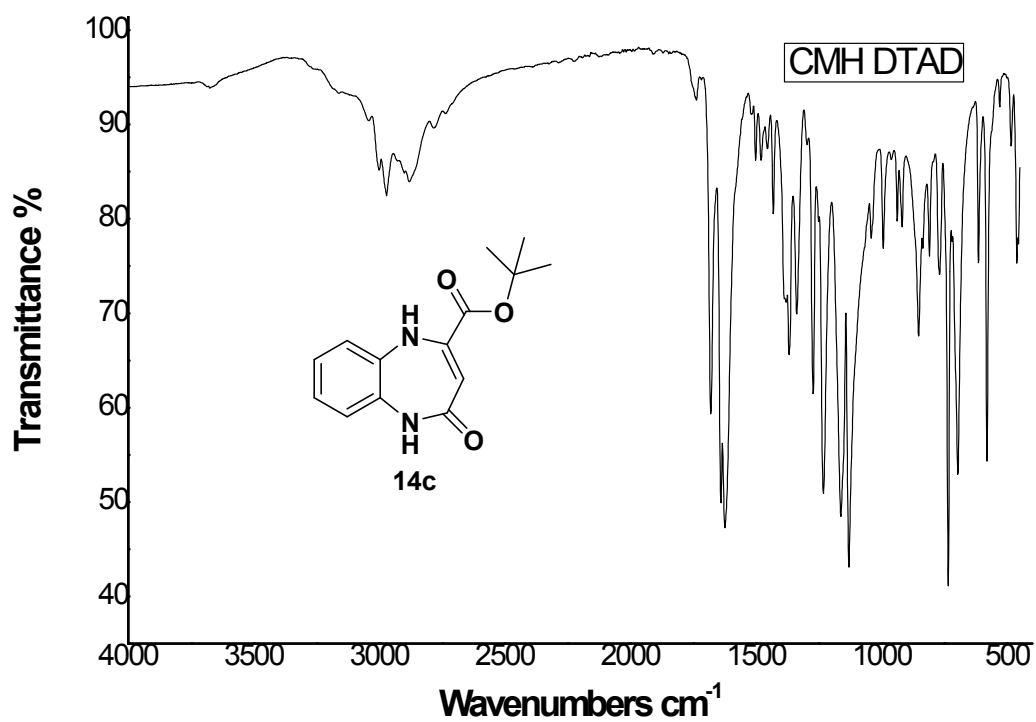

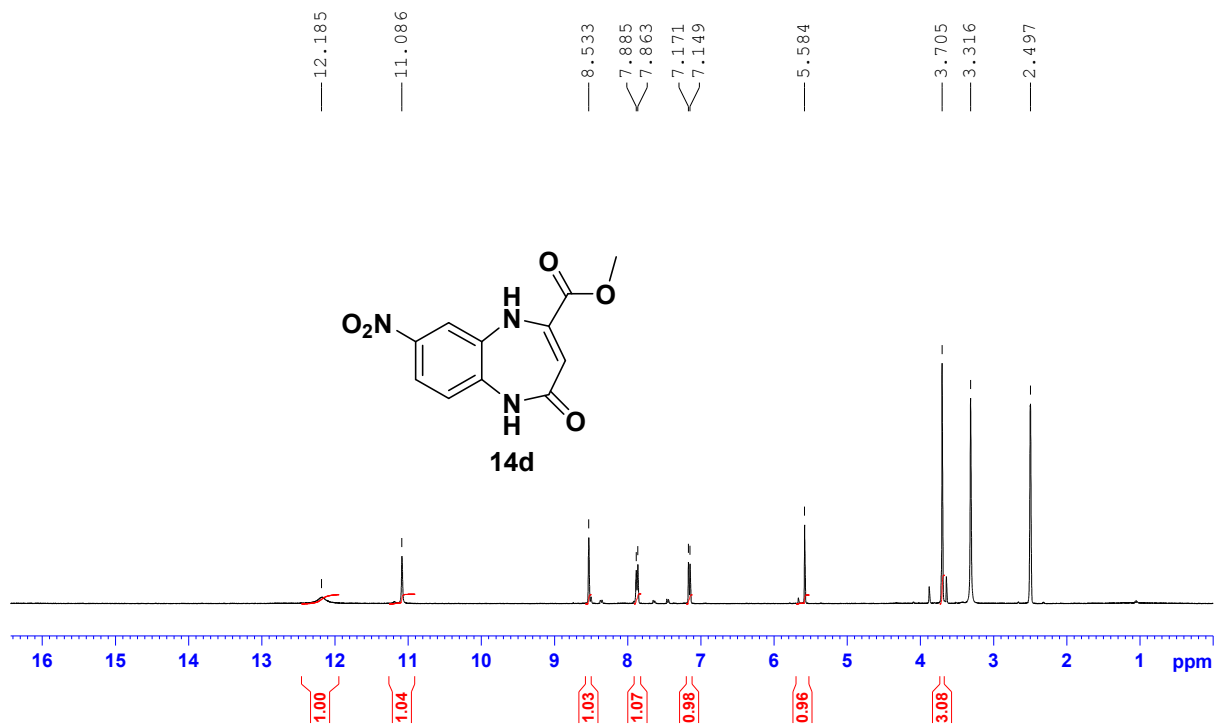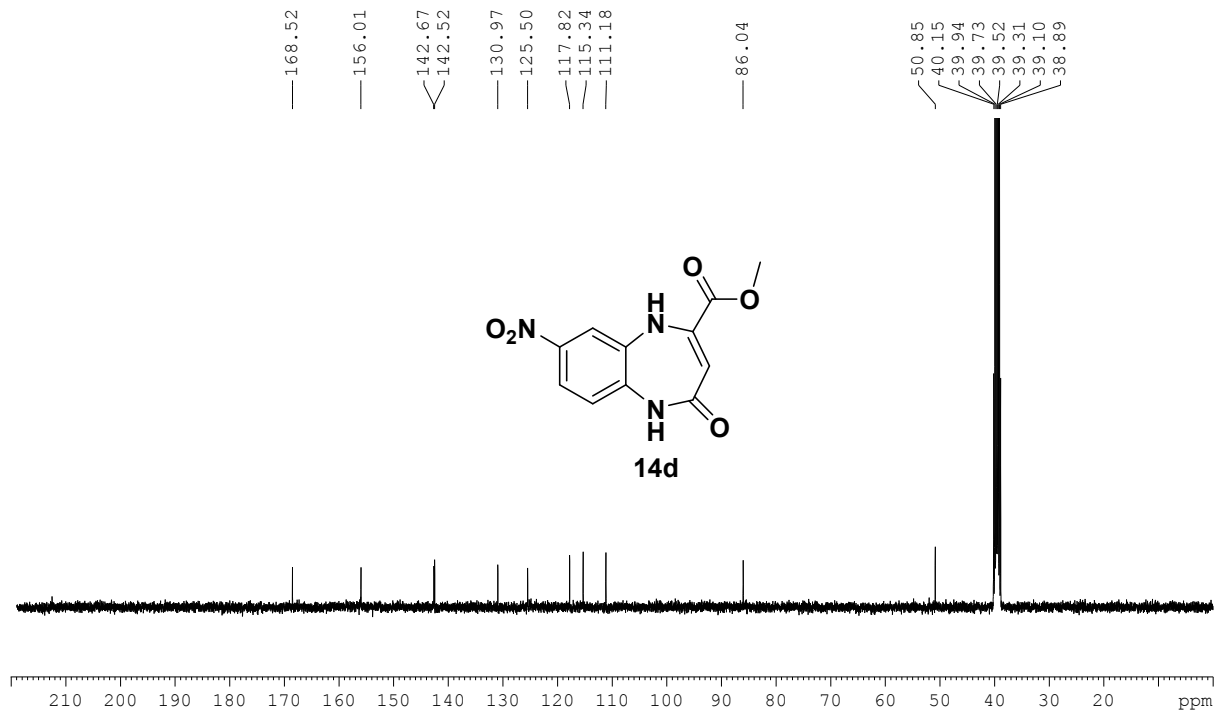

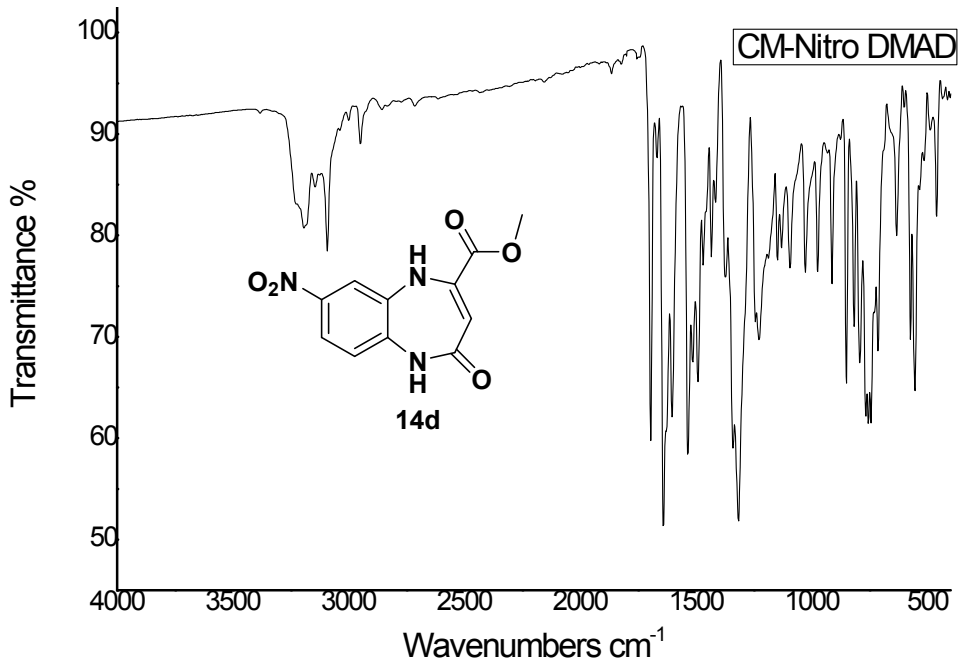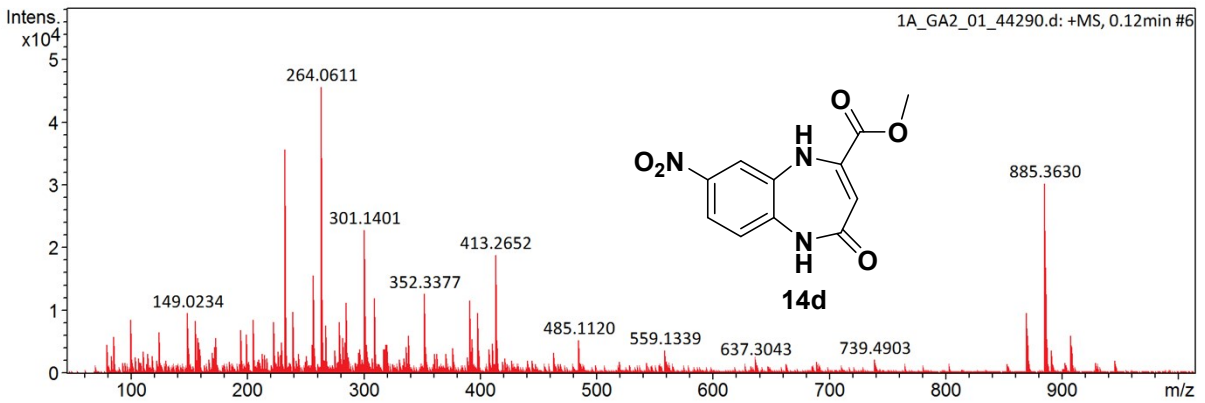

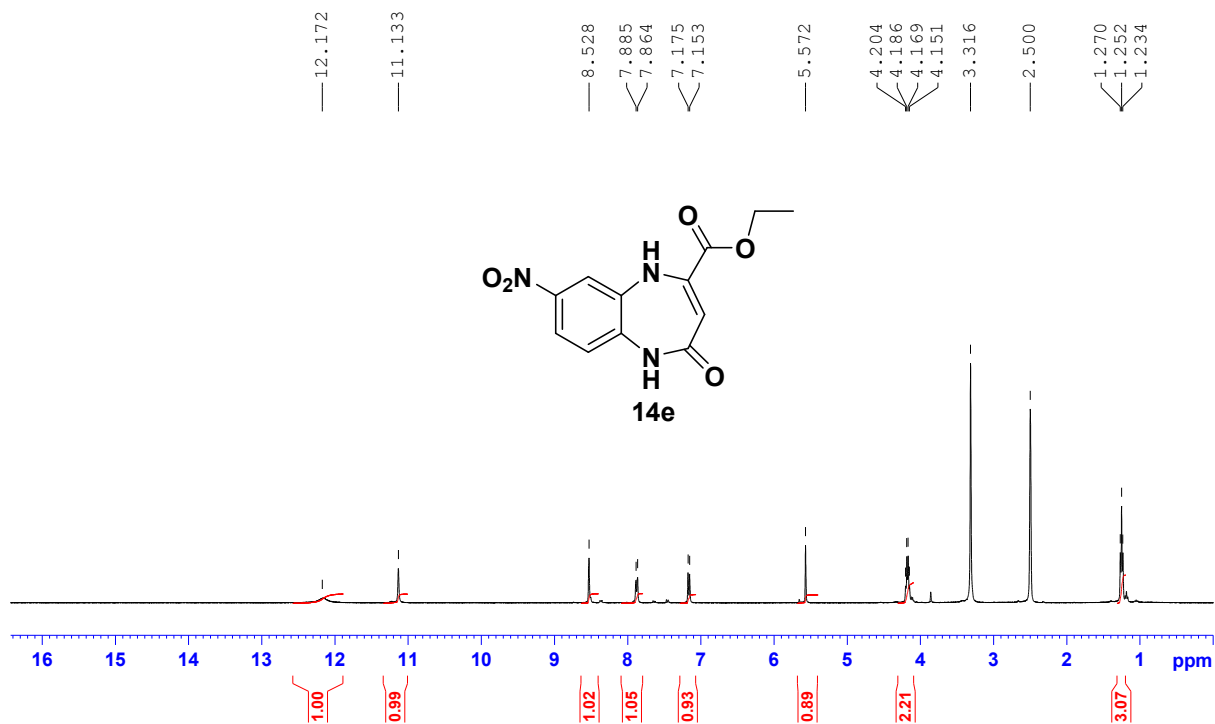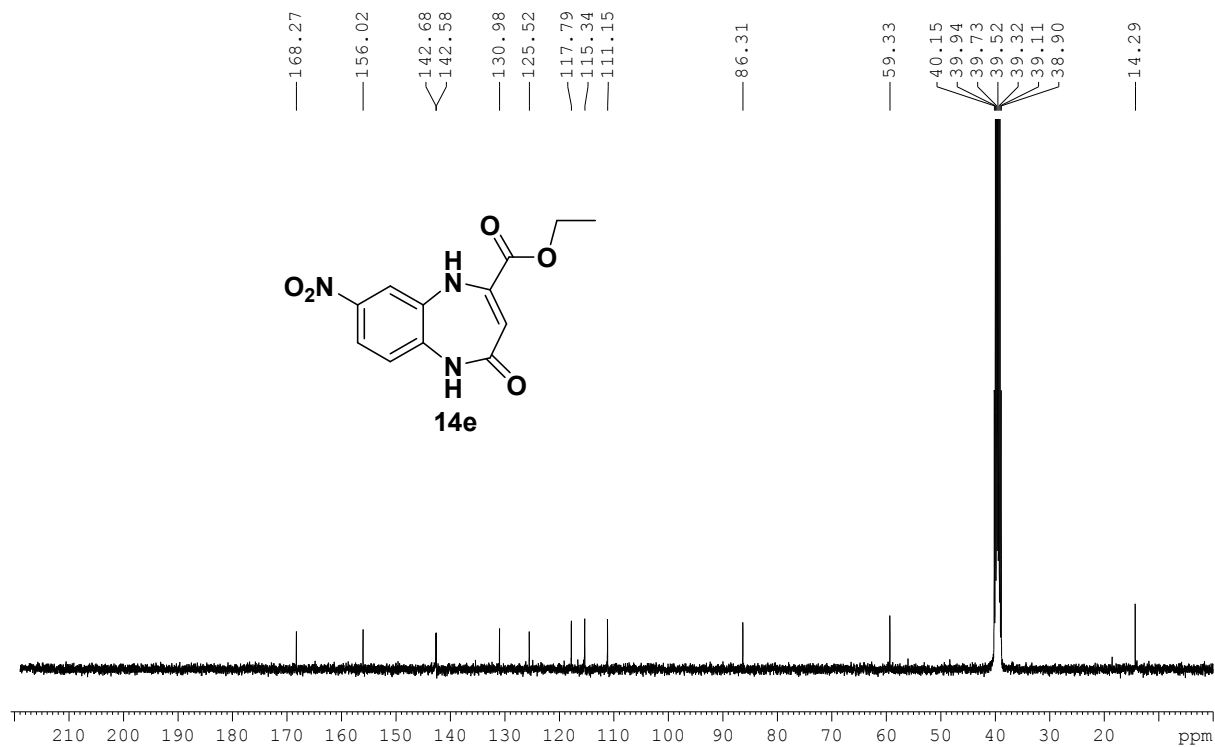

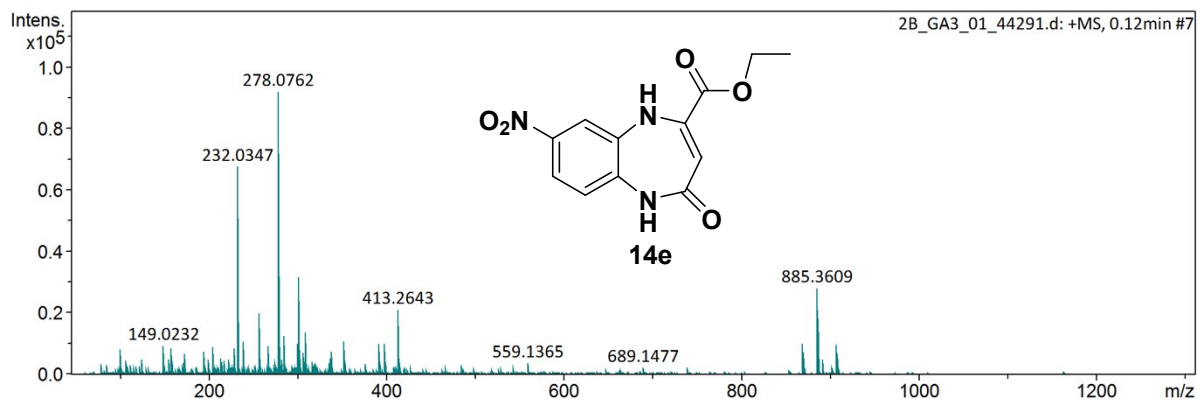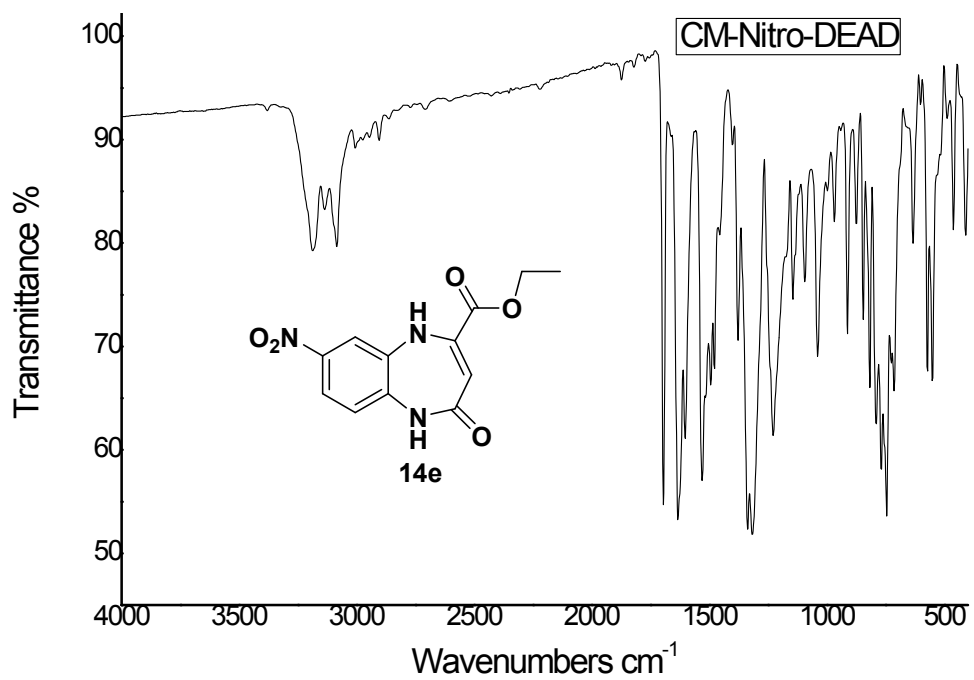

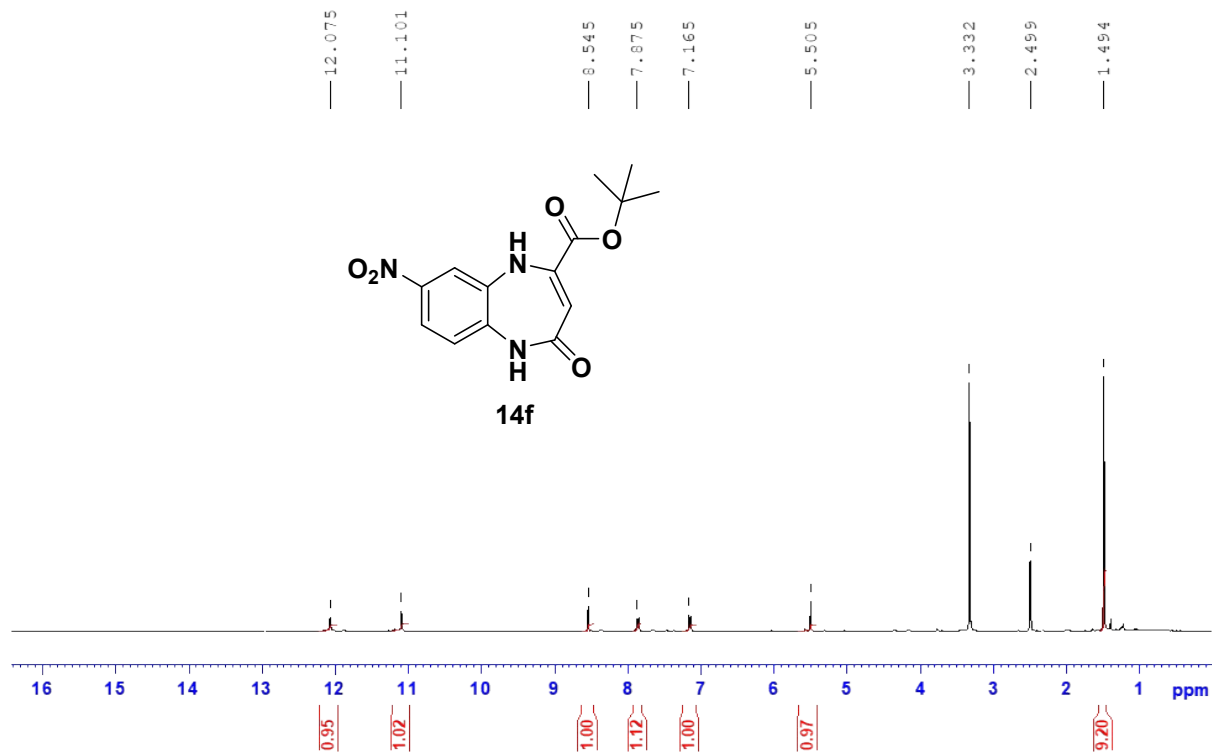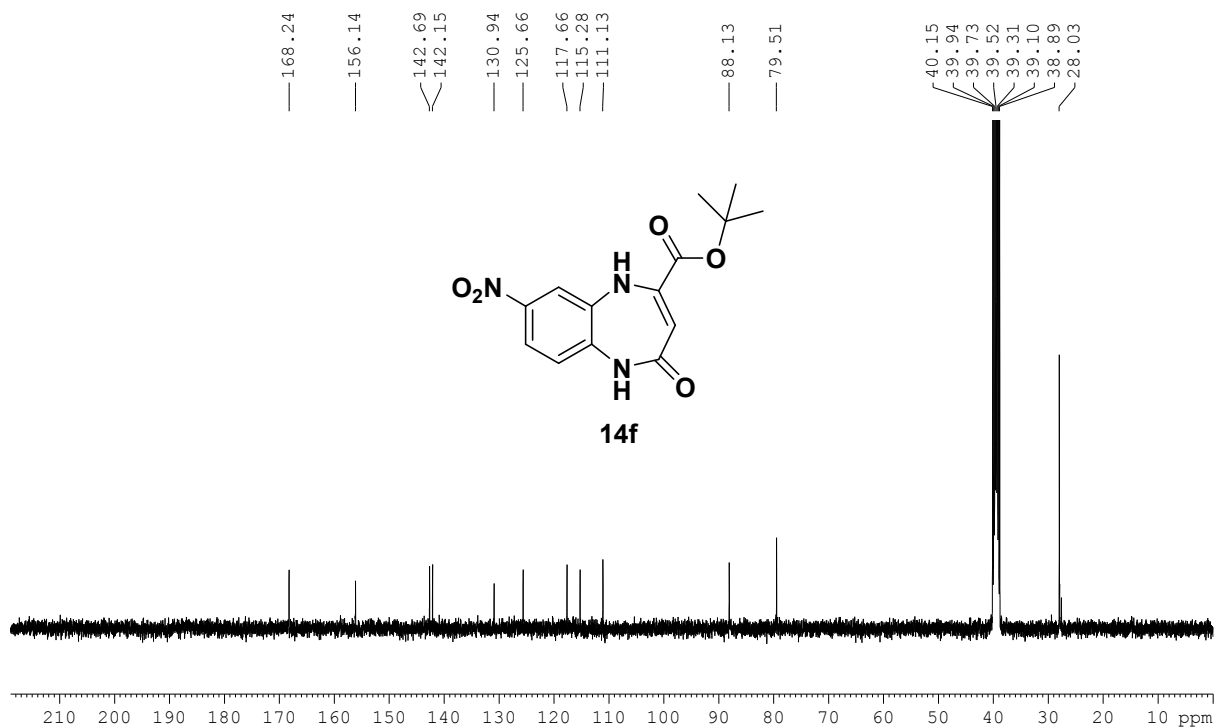

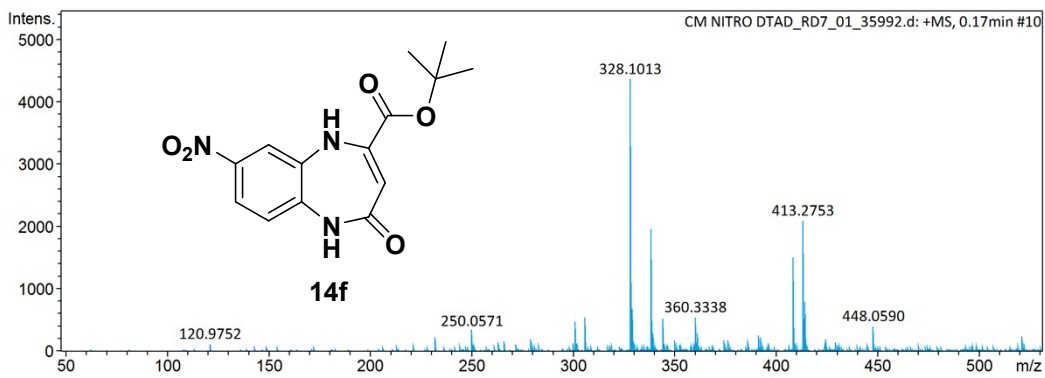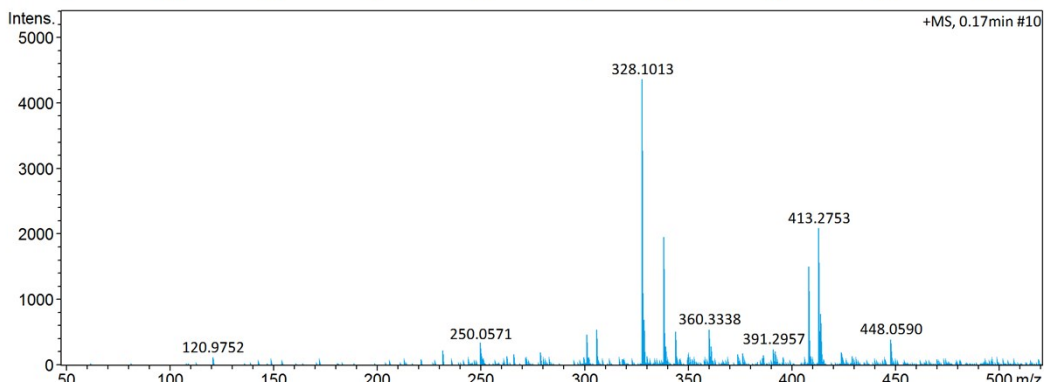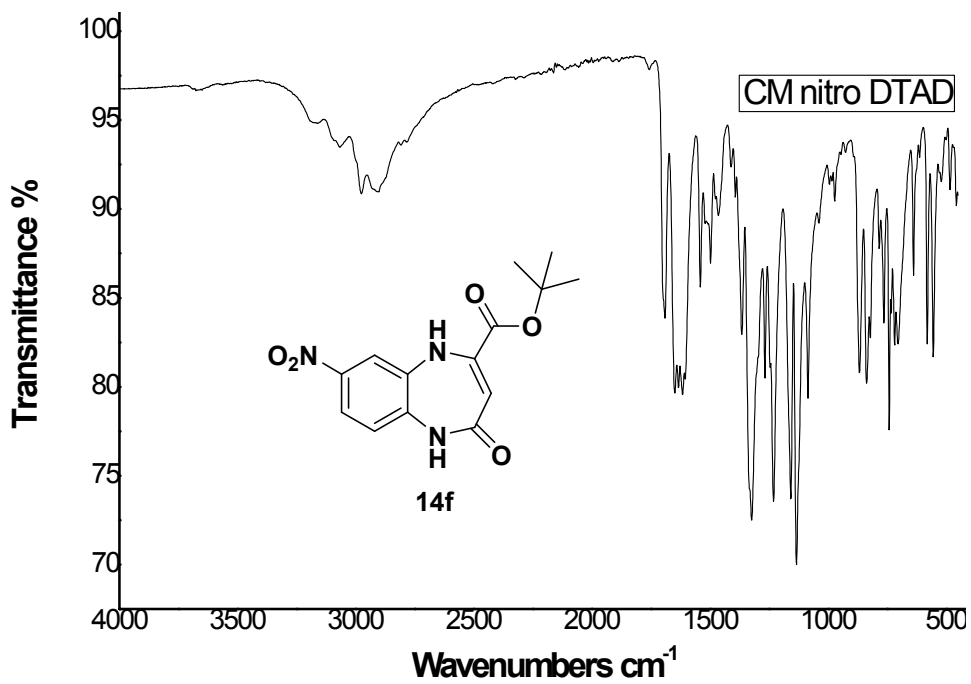

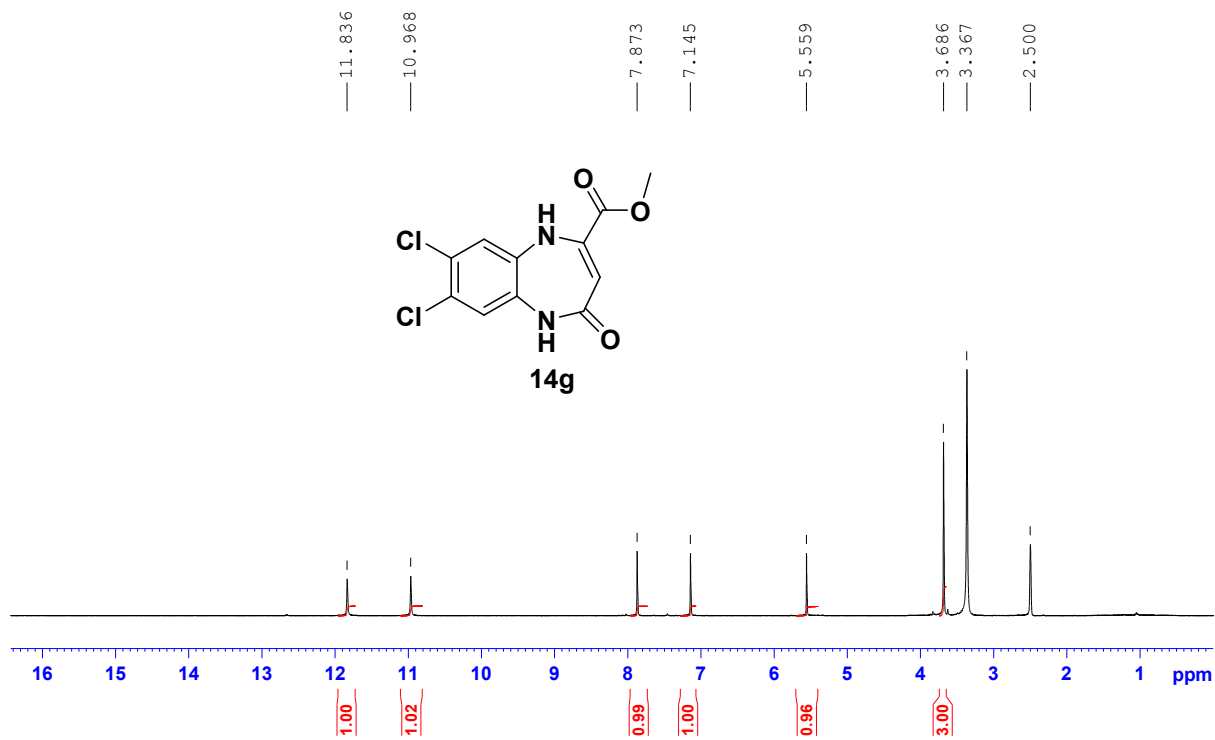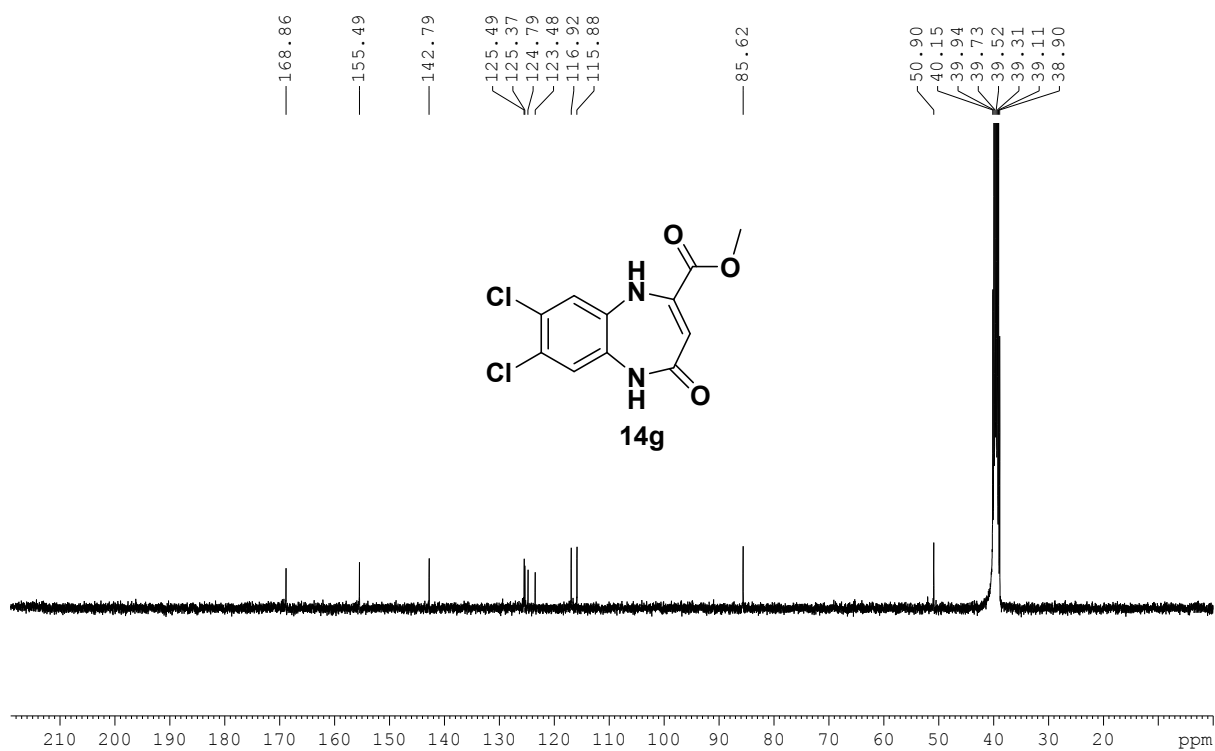



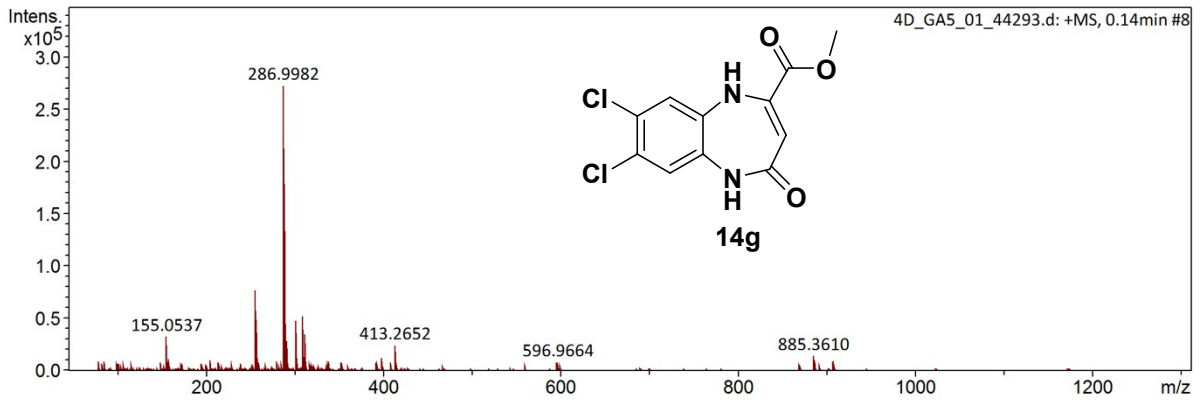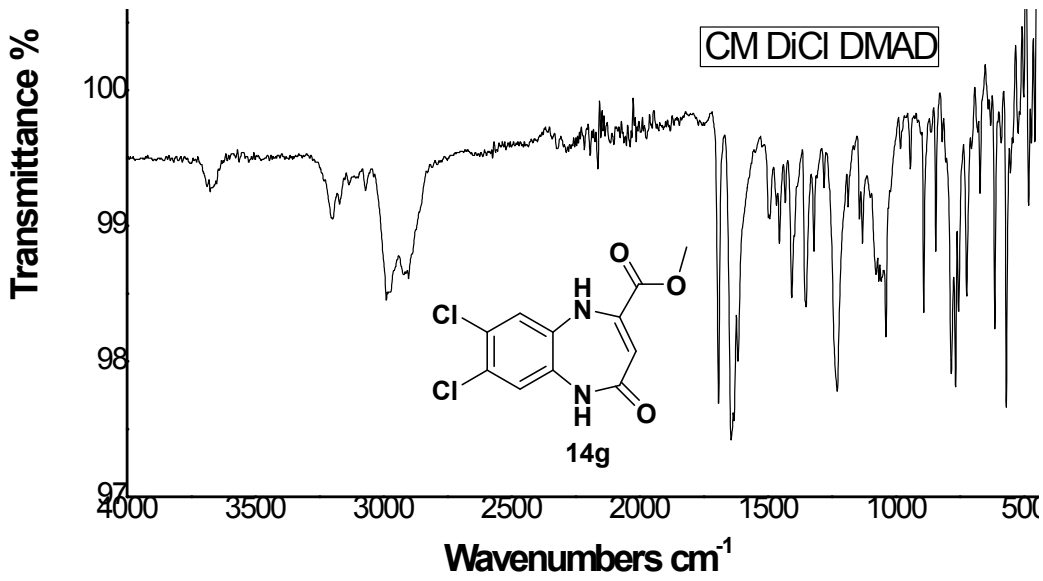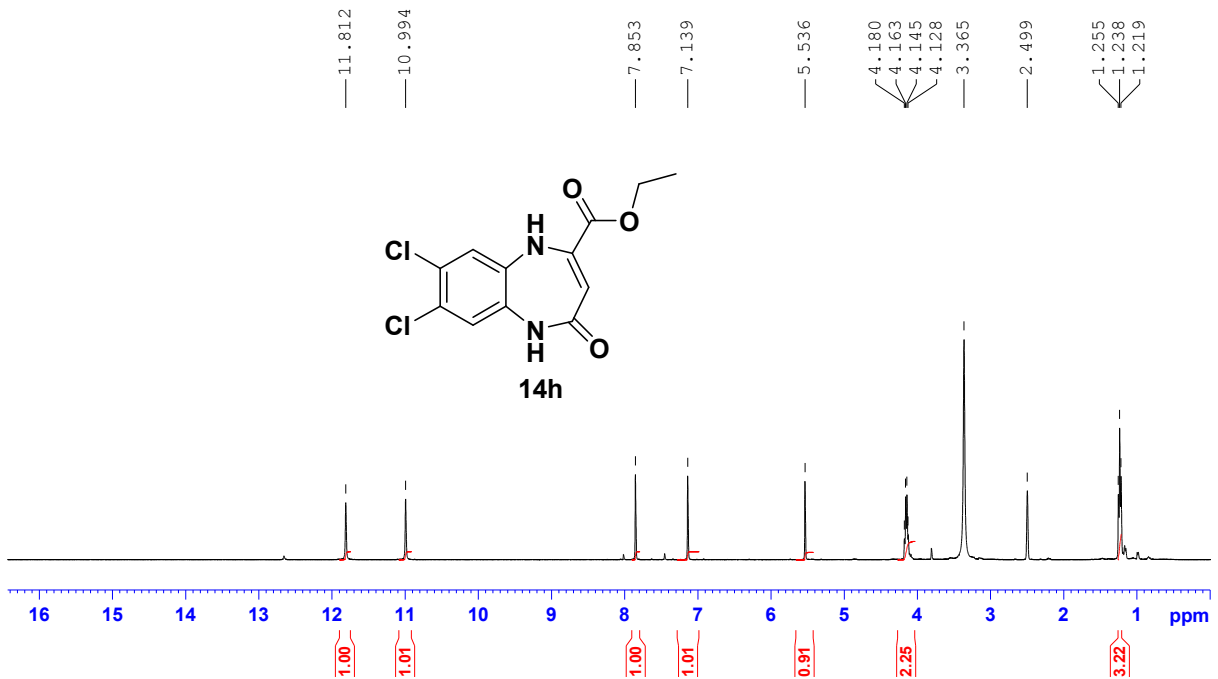

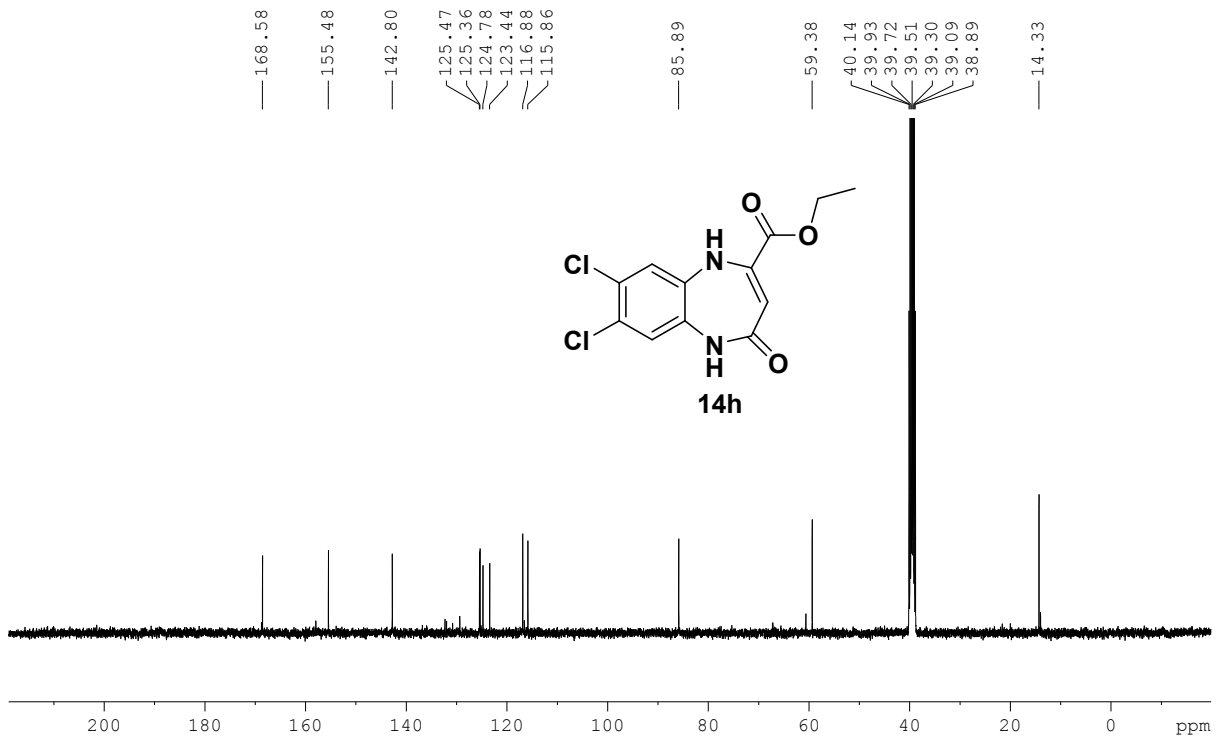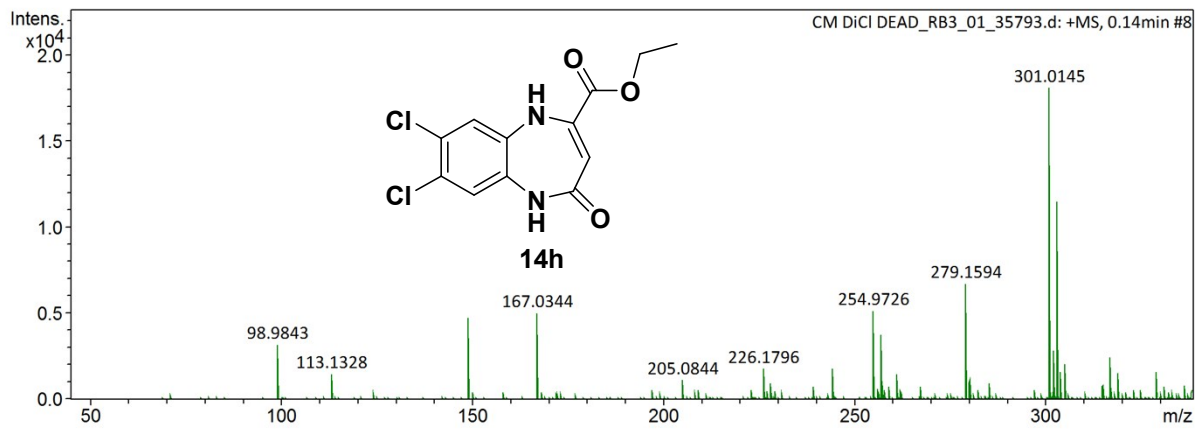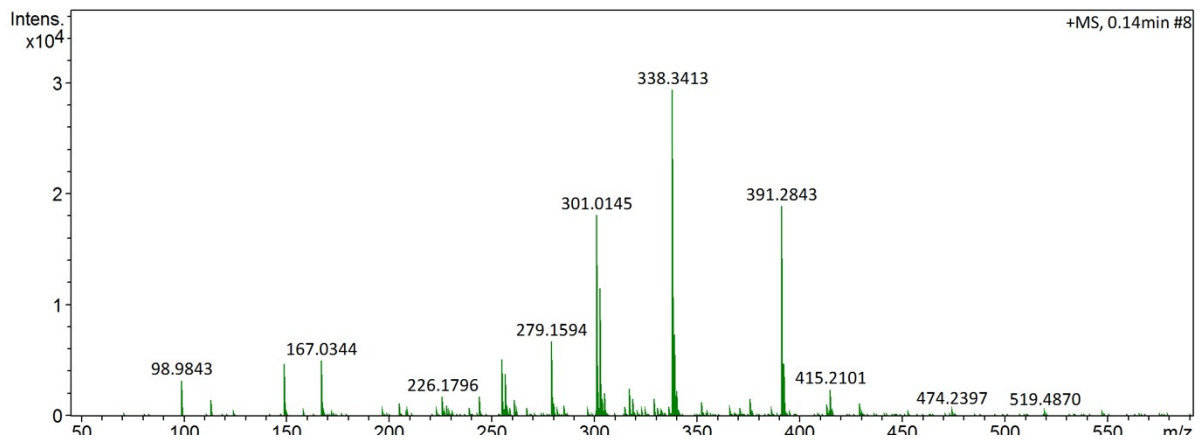

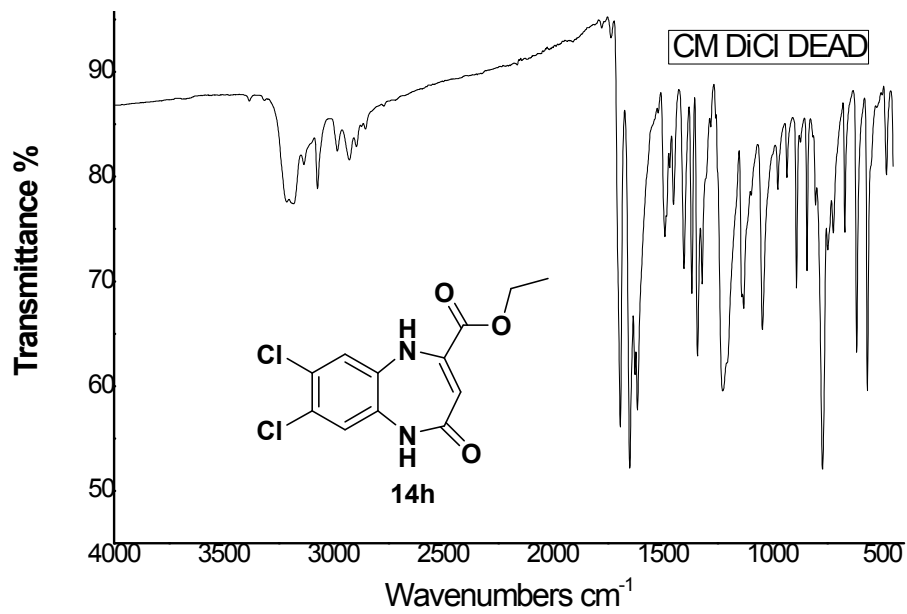

— 11.728  
 — 10.945  
 — 7.872  
 — 7.139  
 — 5.479  
 — 3.333  
 — 2.500  
 — 1.481

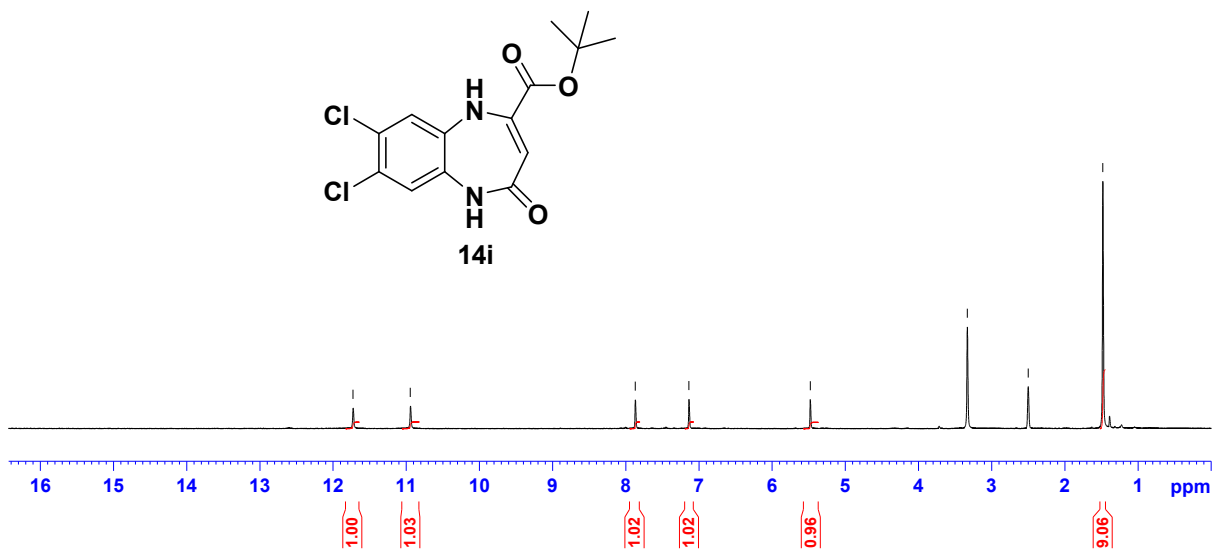

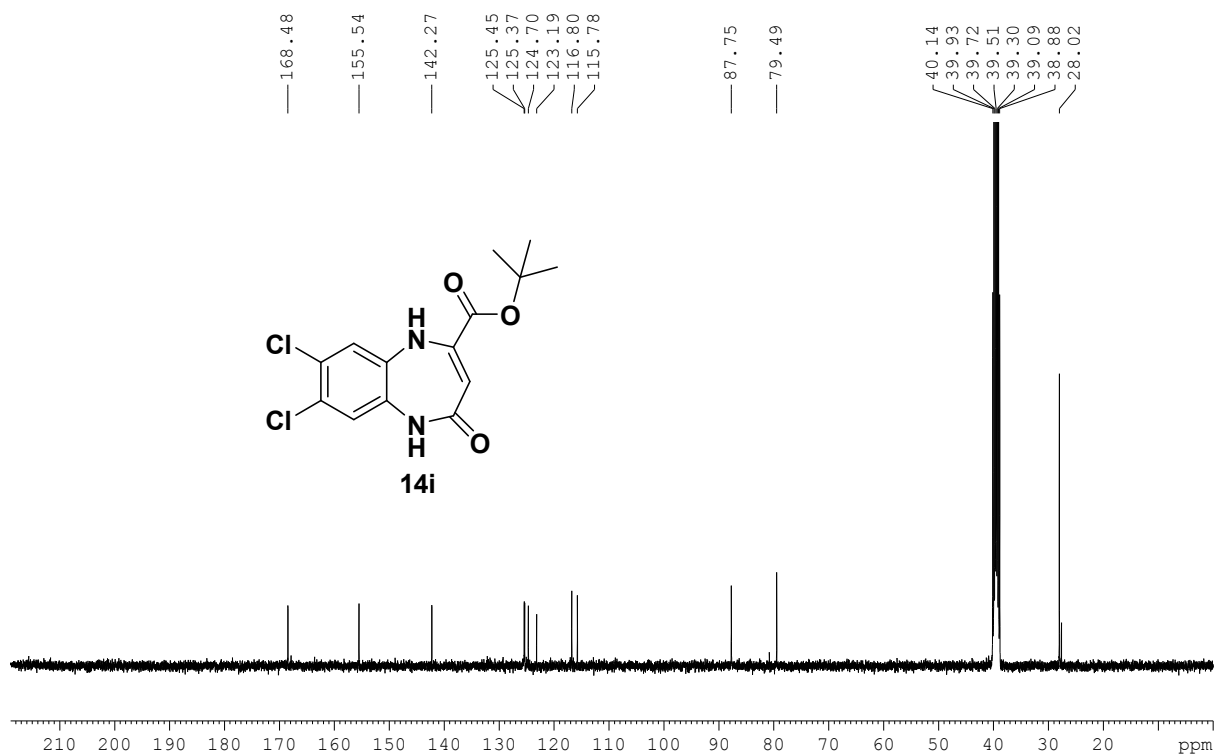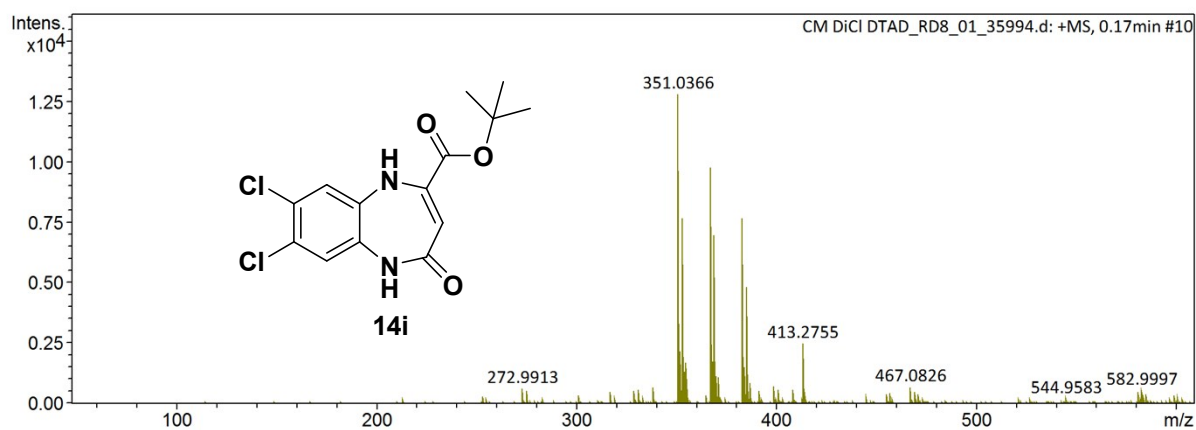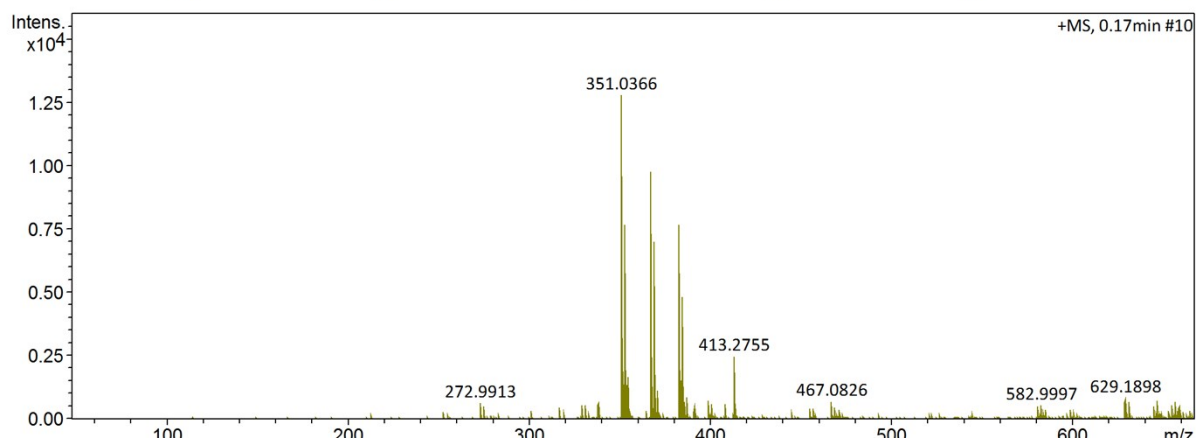

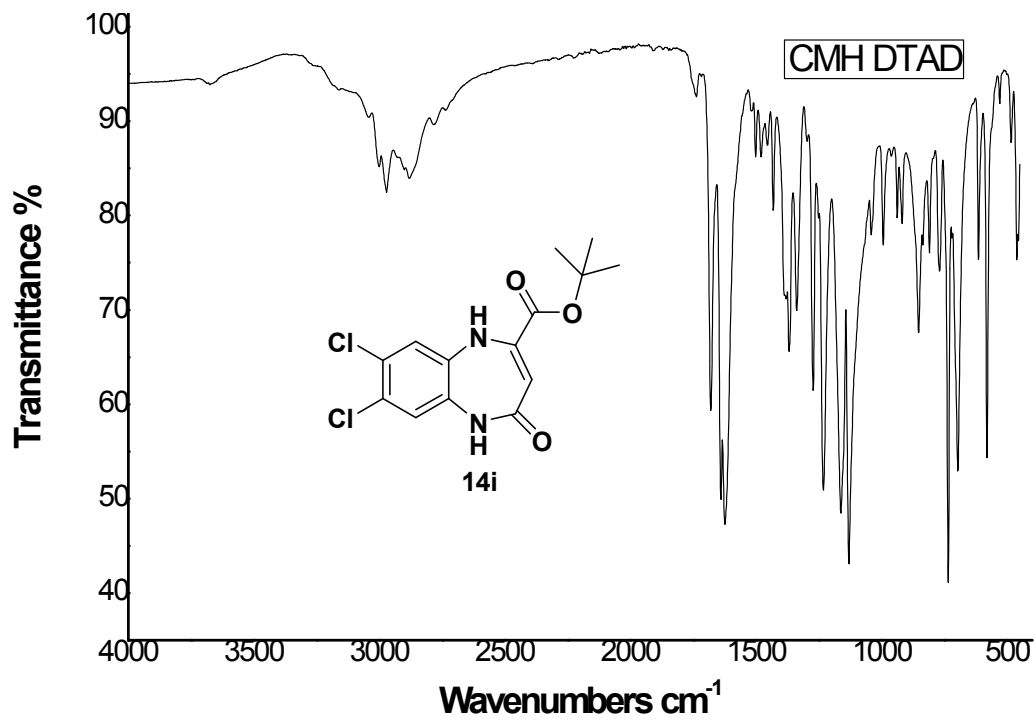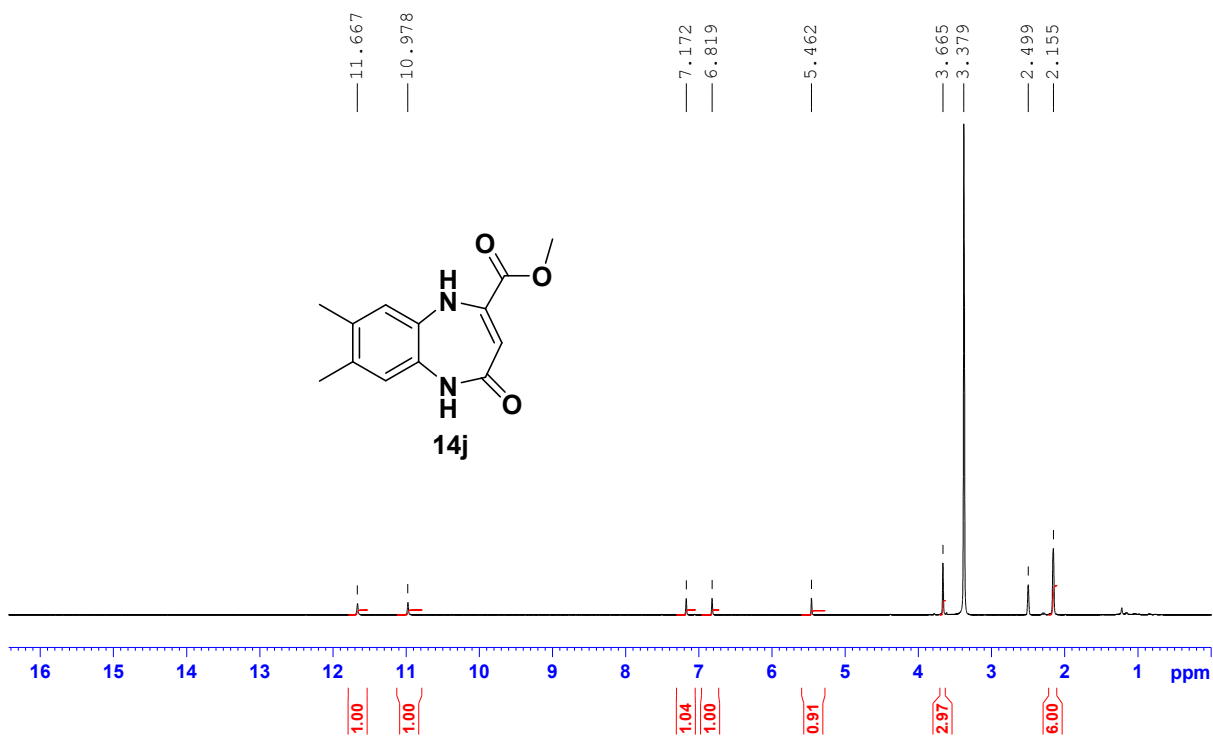

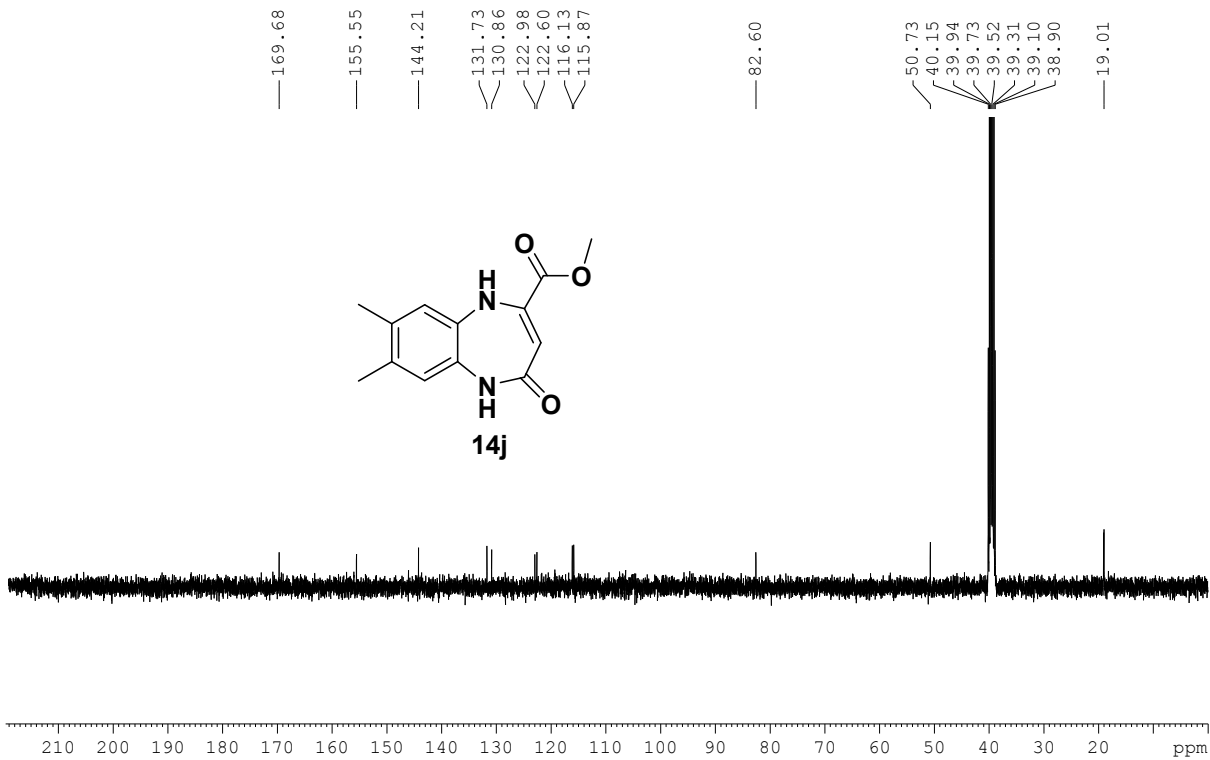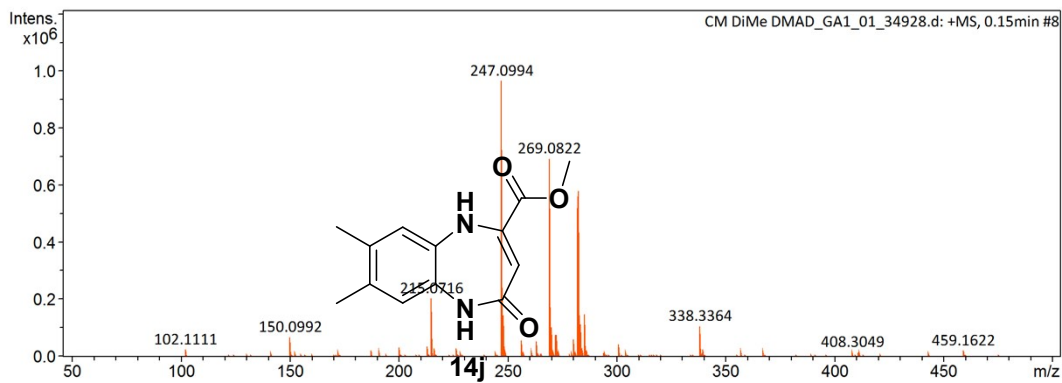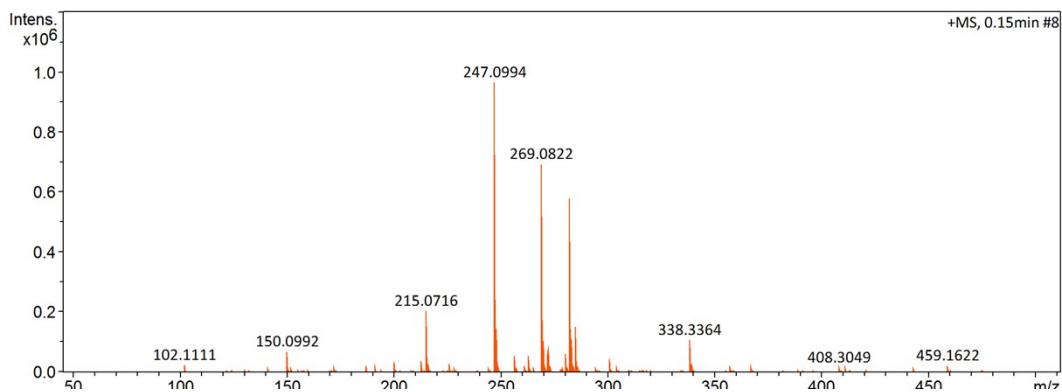

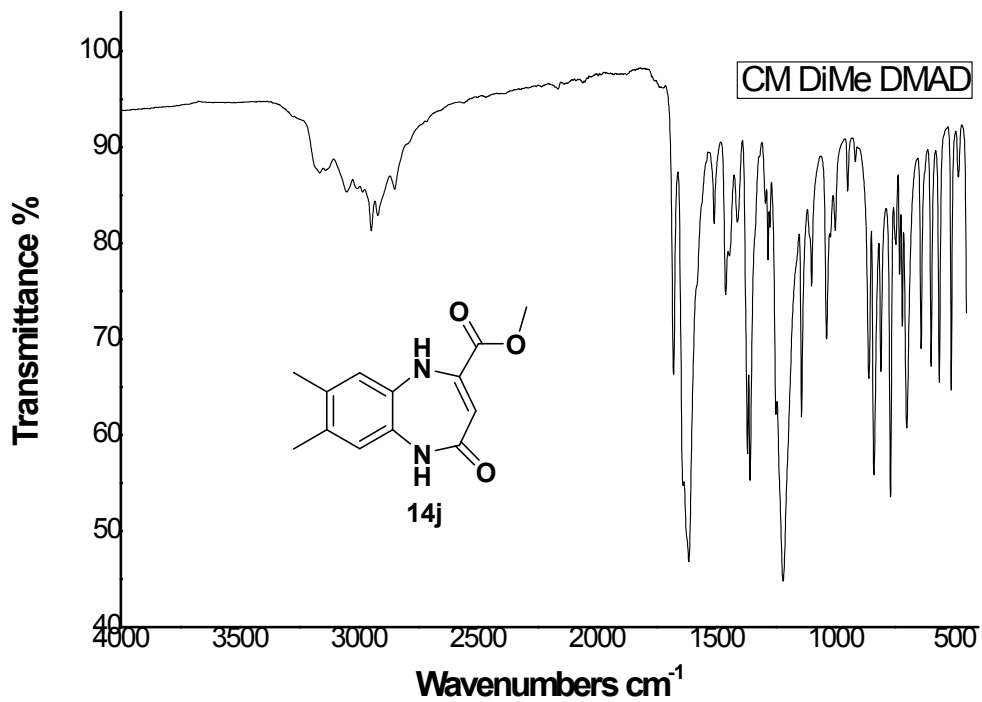

6.692  
6.683  
6.678  
6.669  
6.567  
6.559  
6.554  
6.545  
5.436

— 3.379

— 2.500

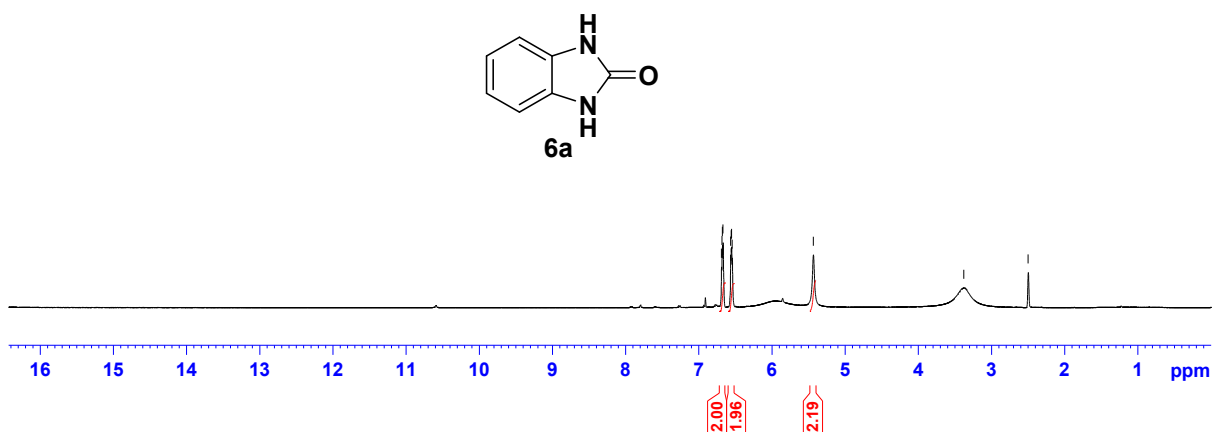

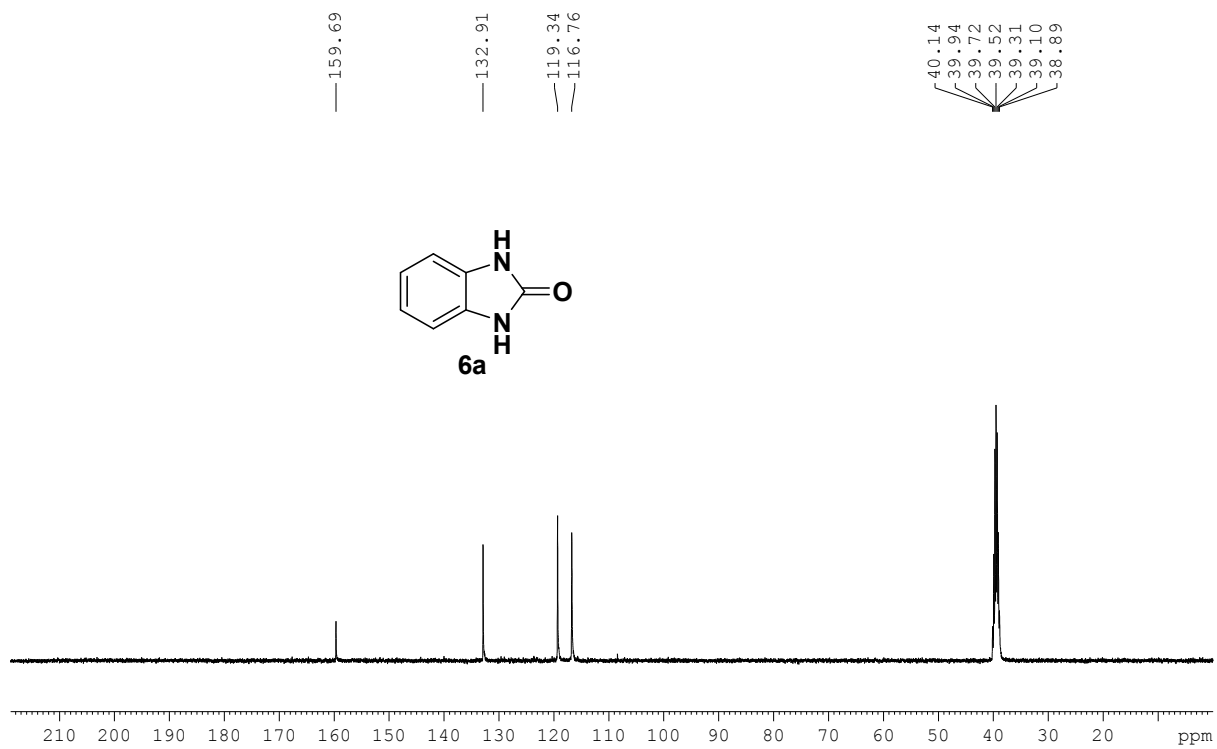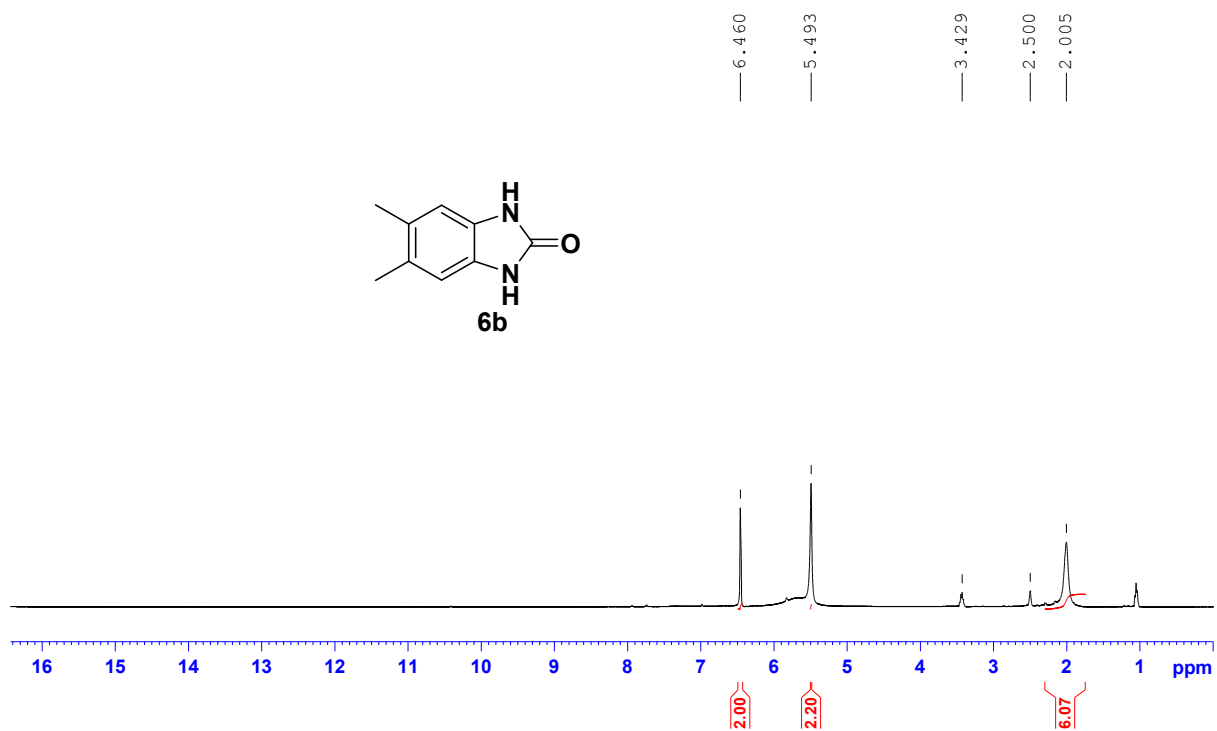



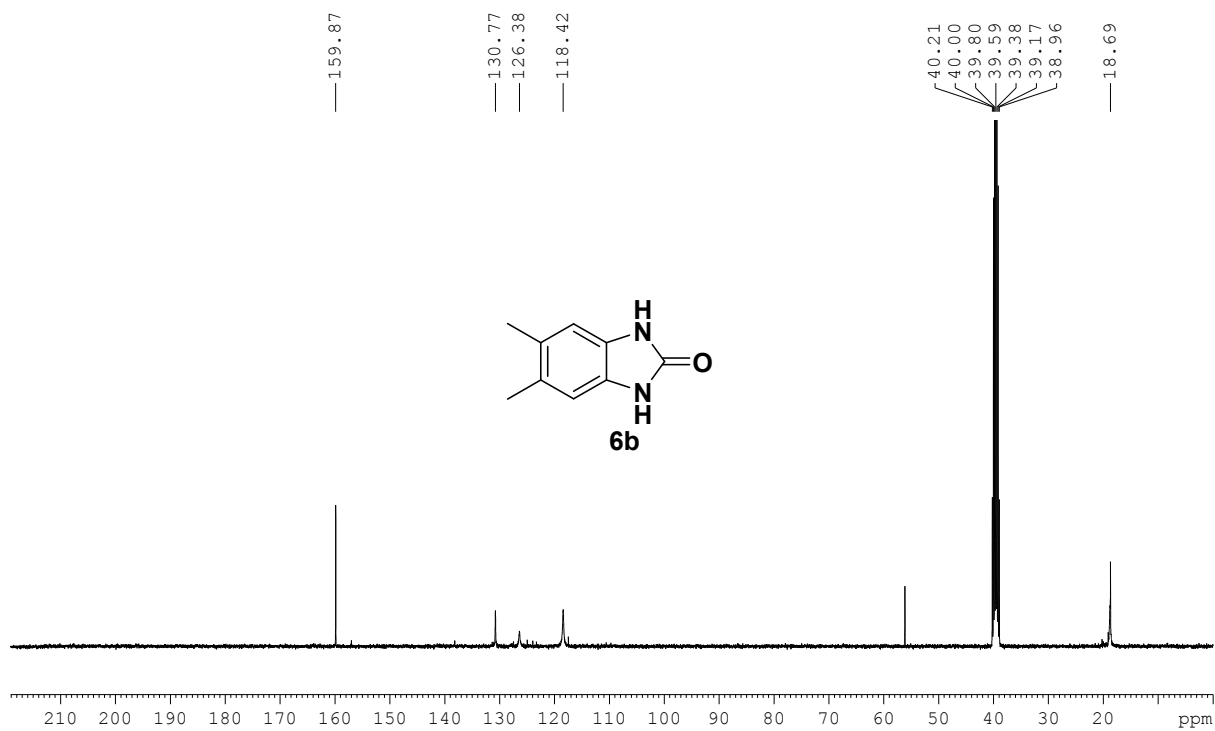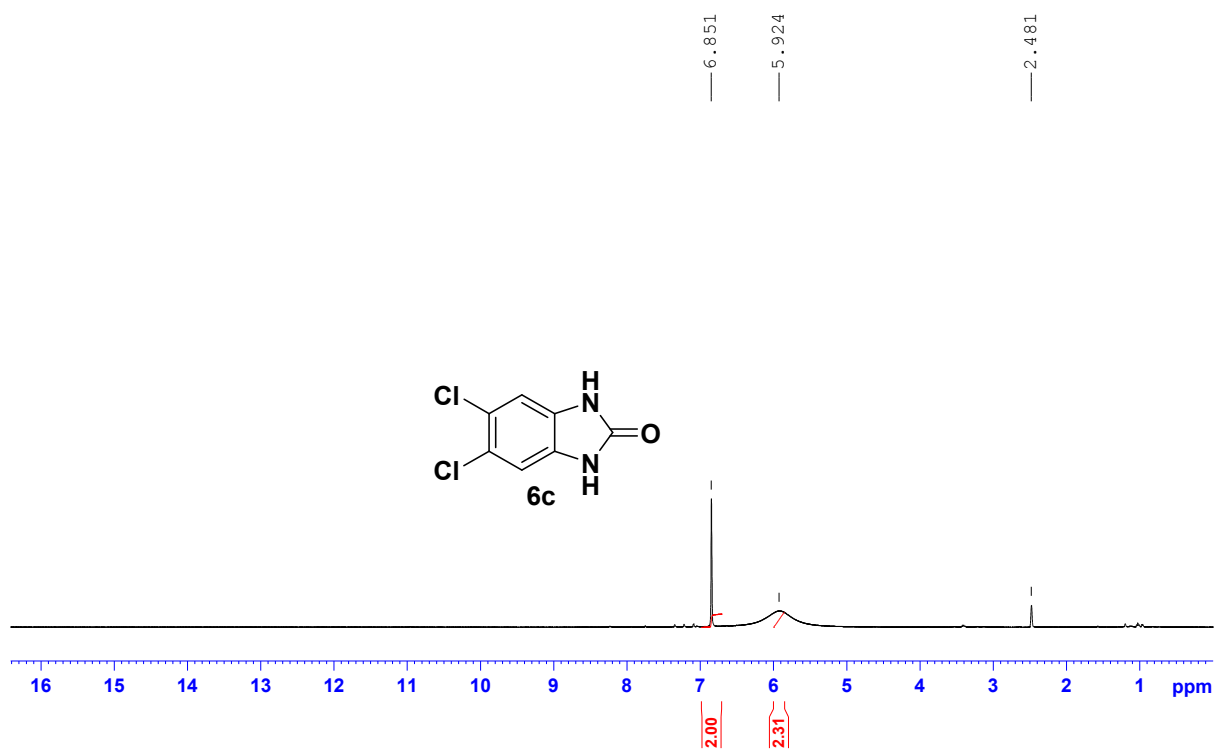

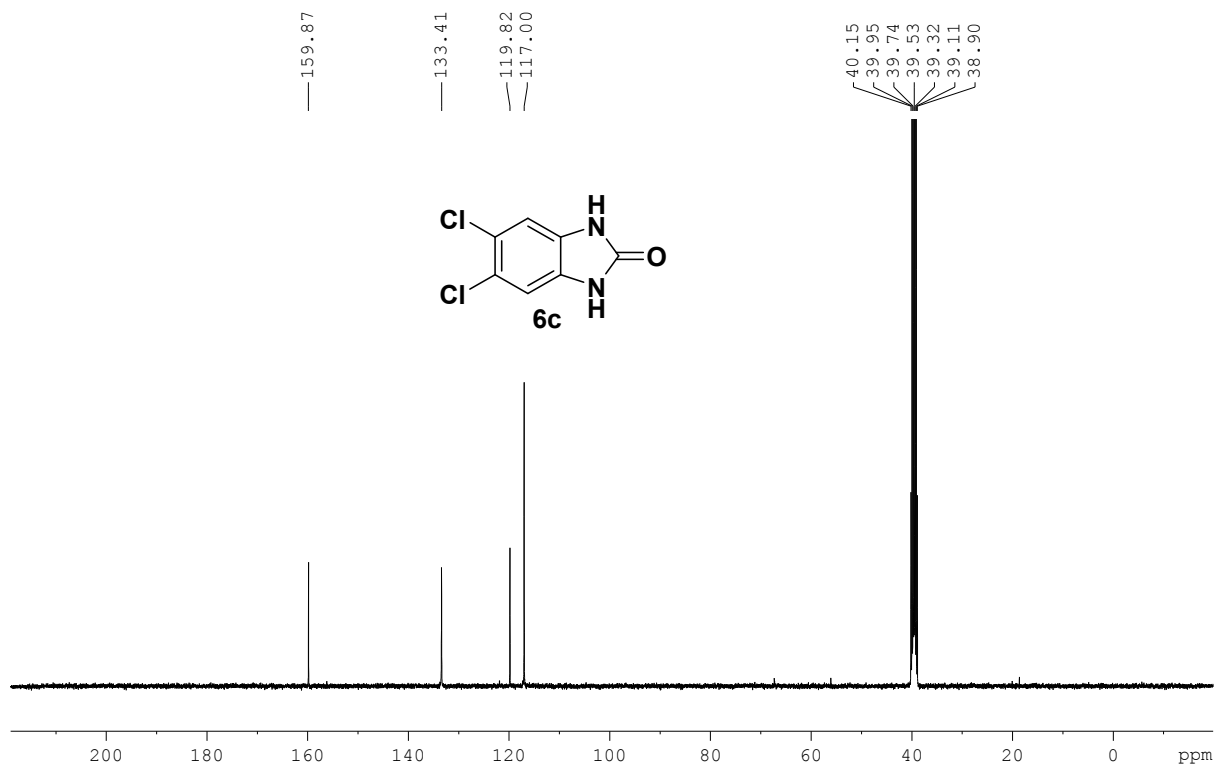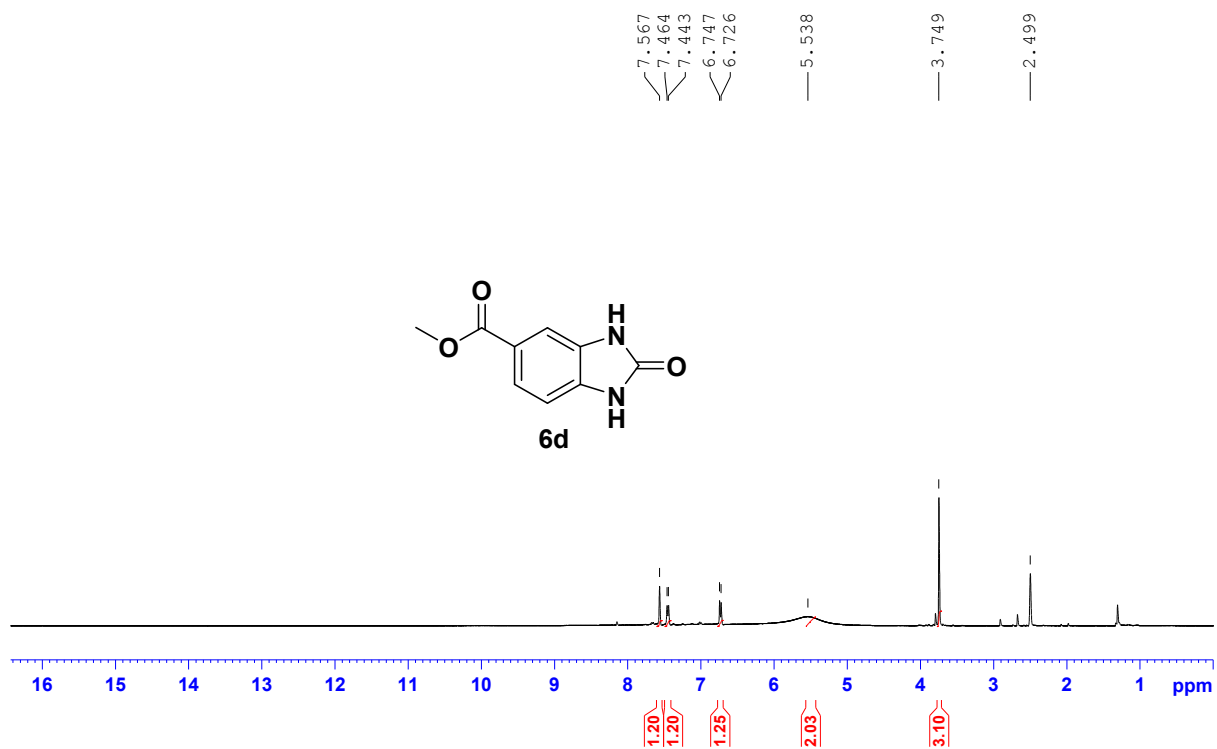

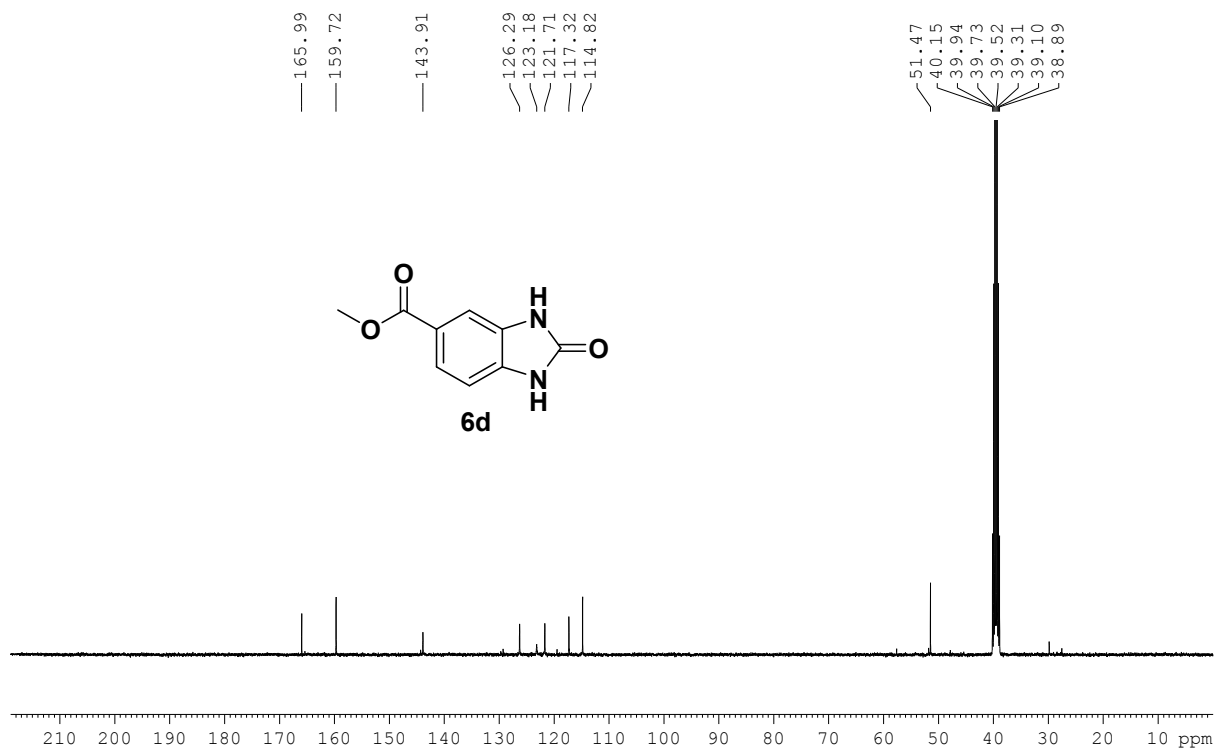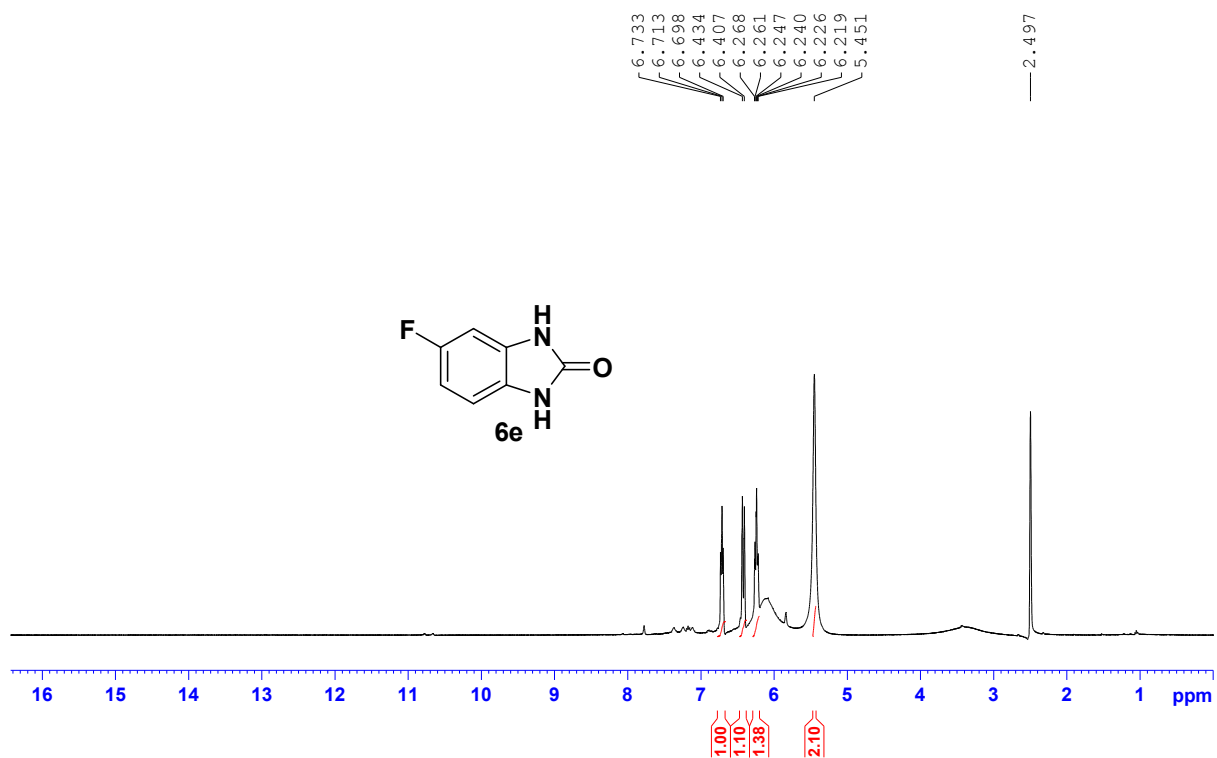

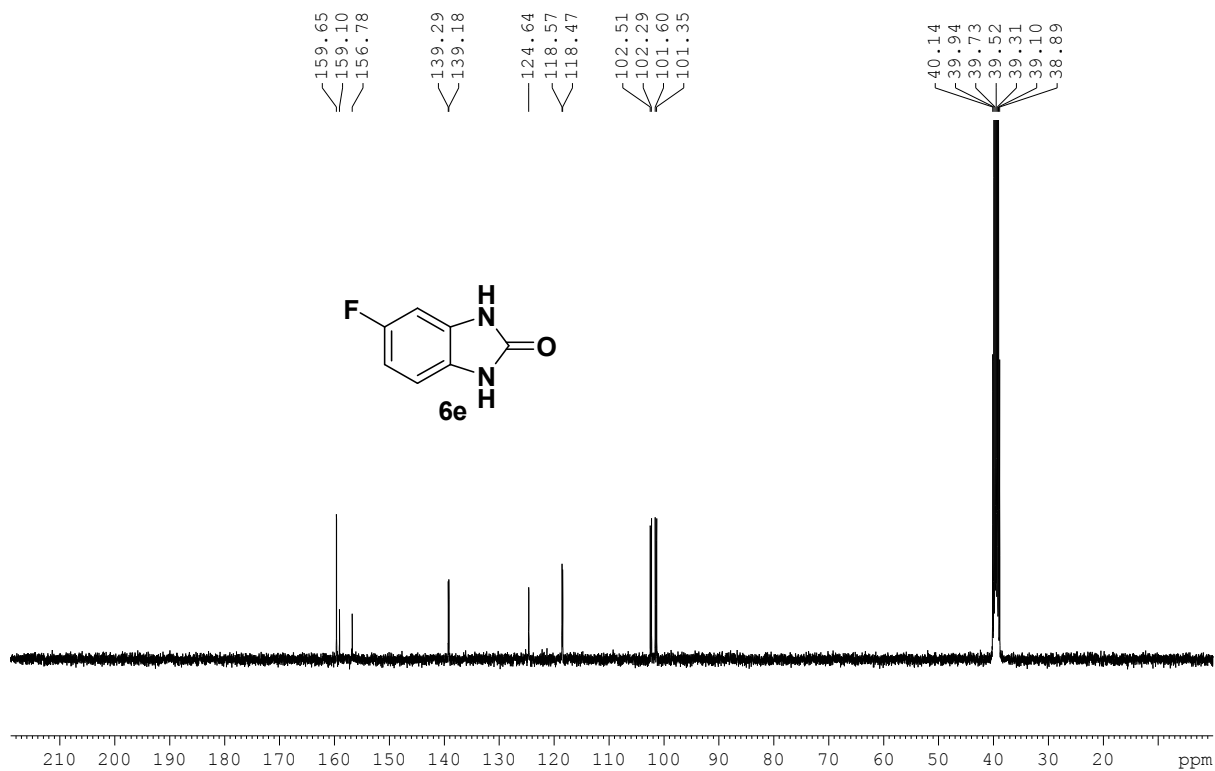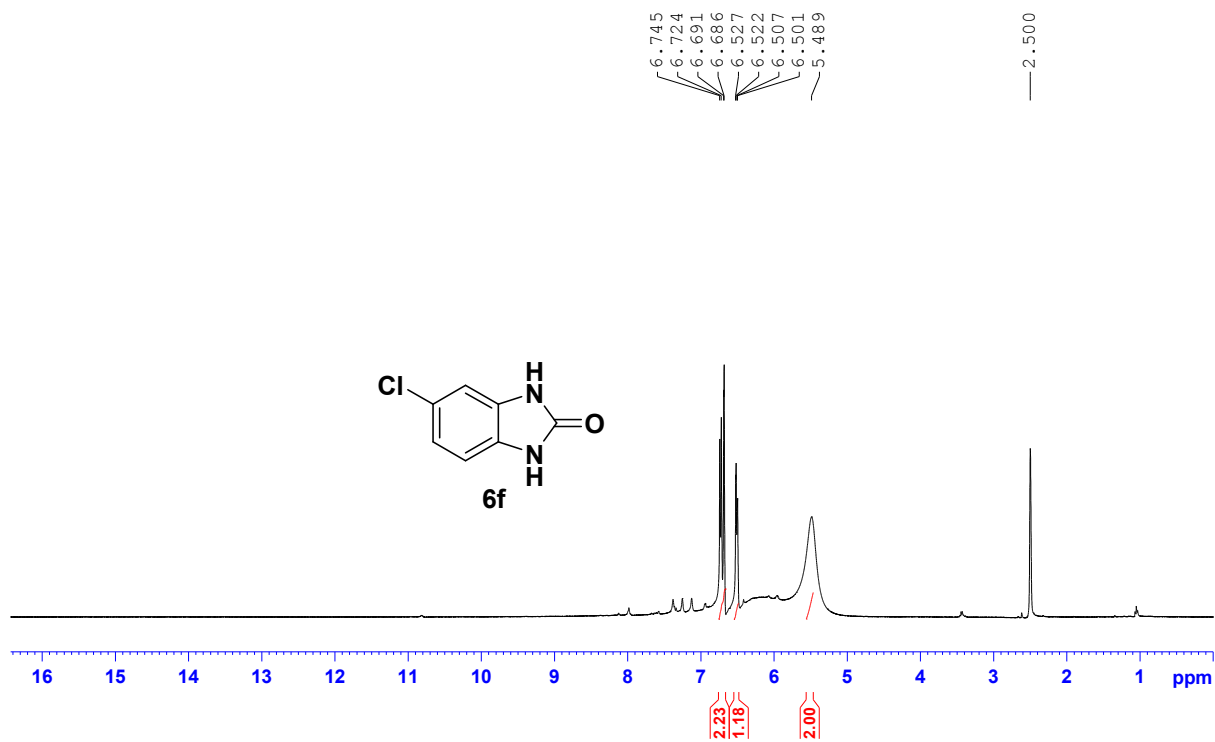

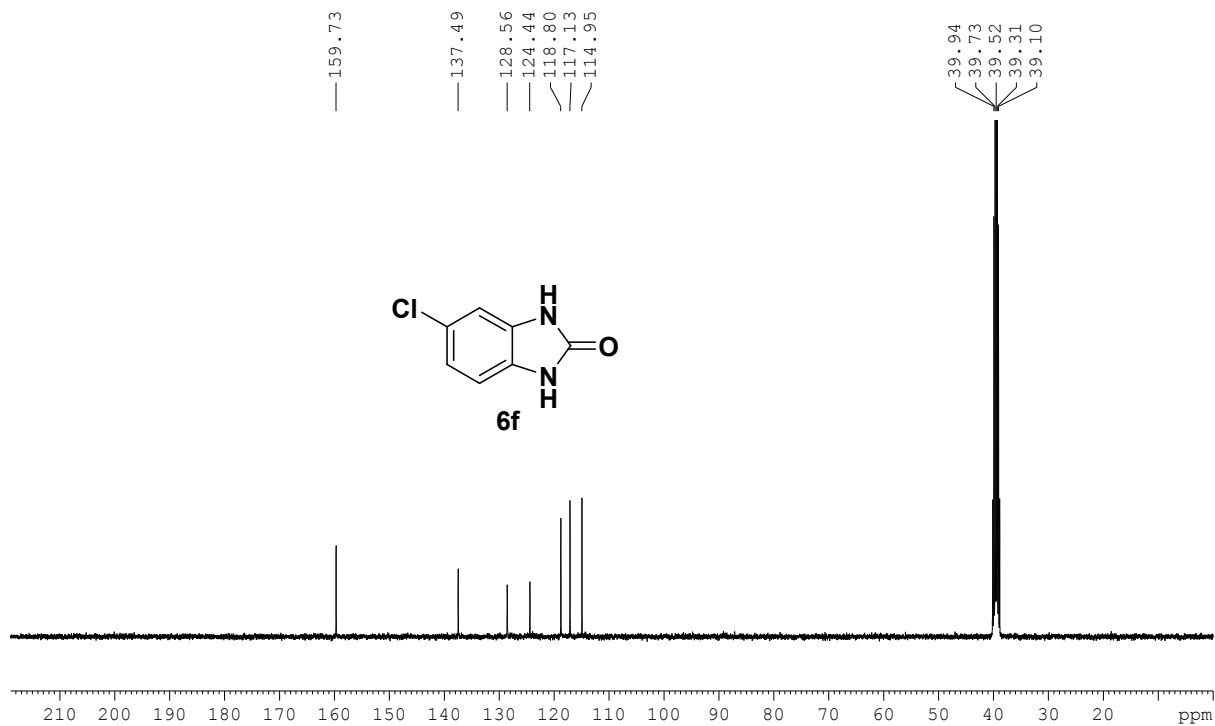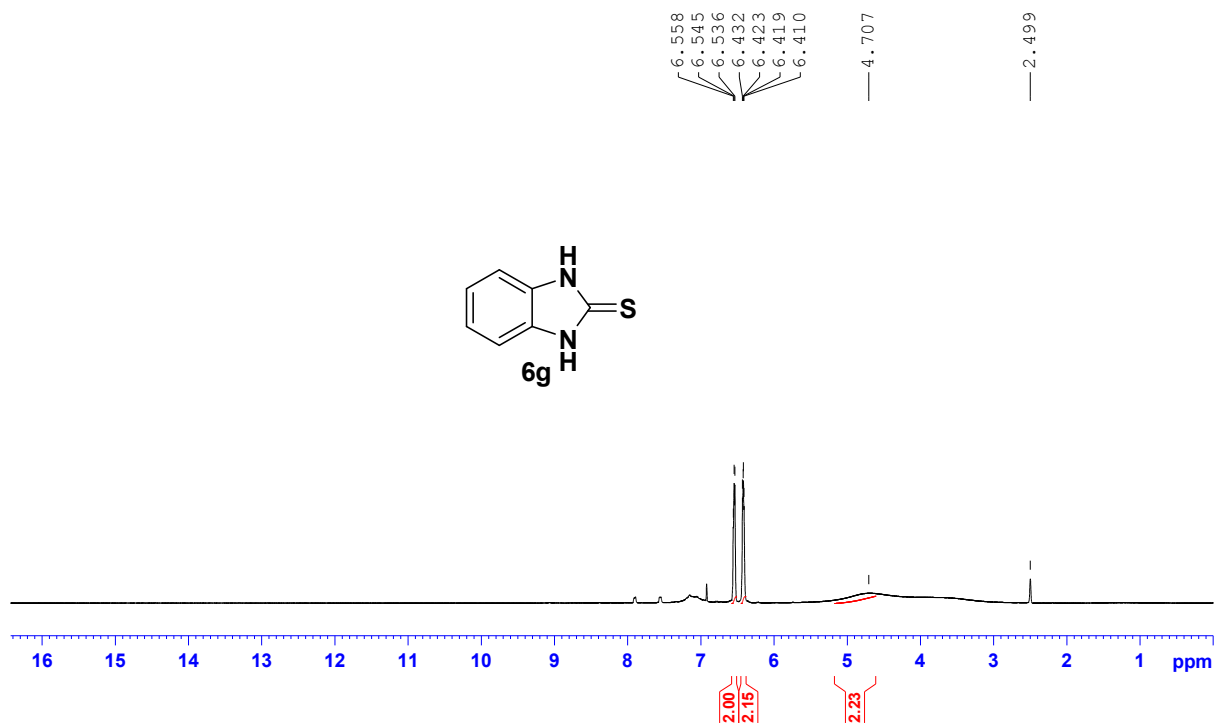

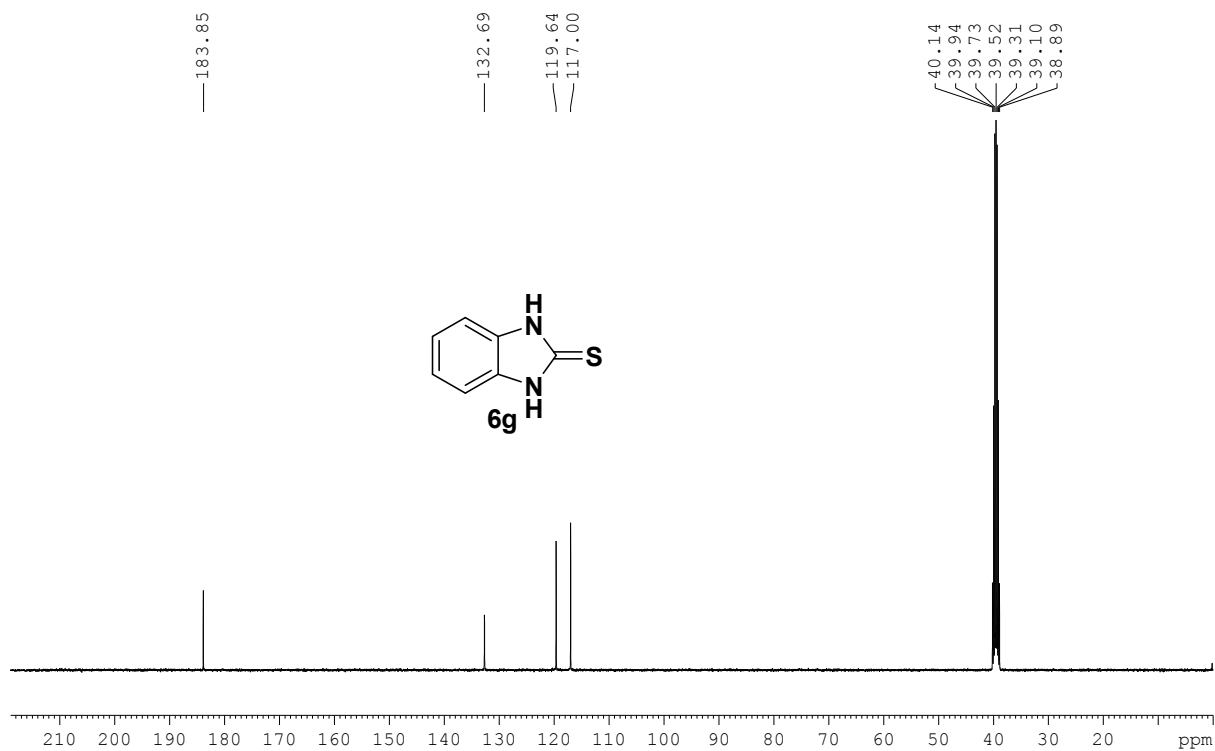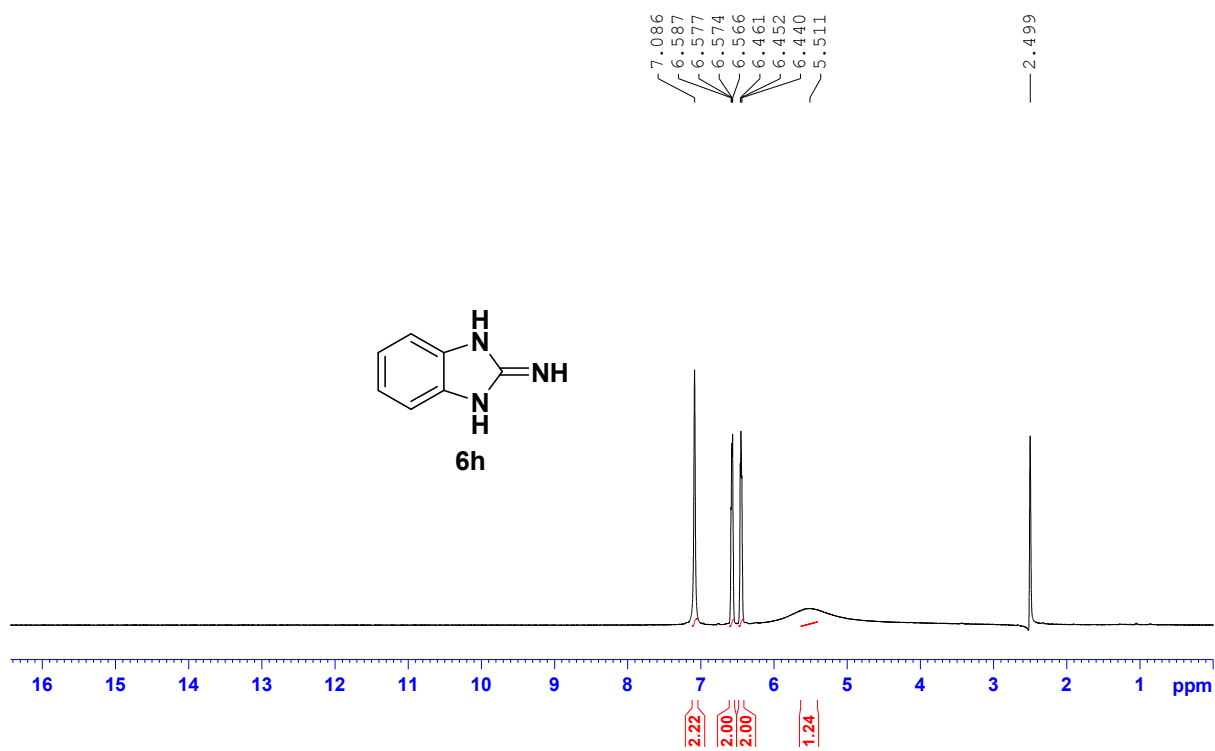

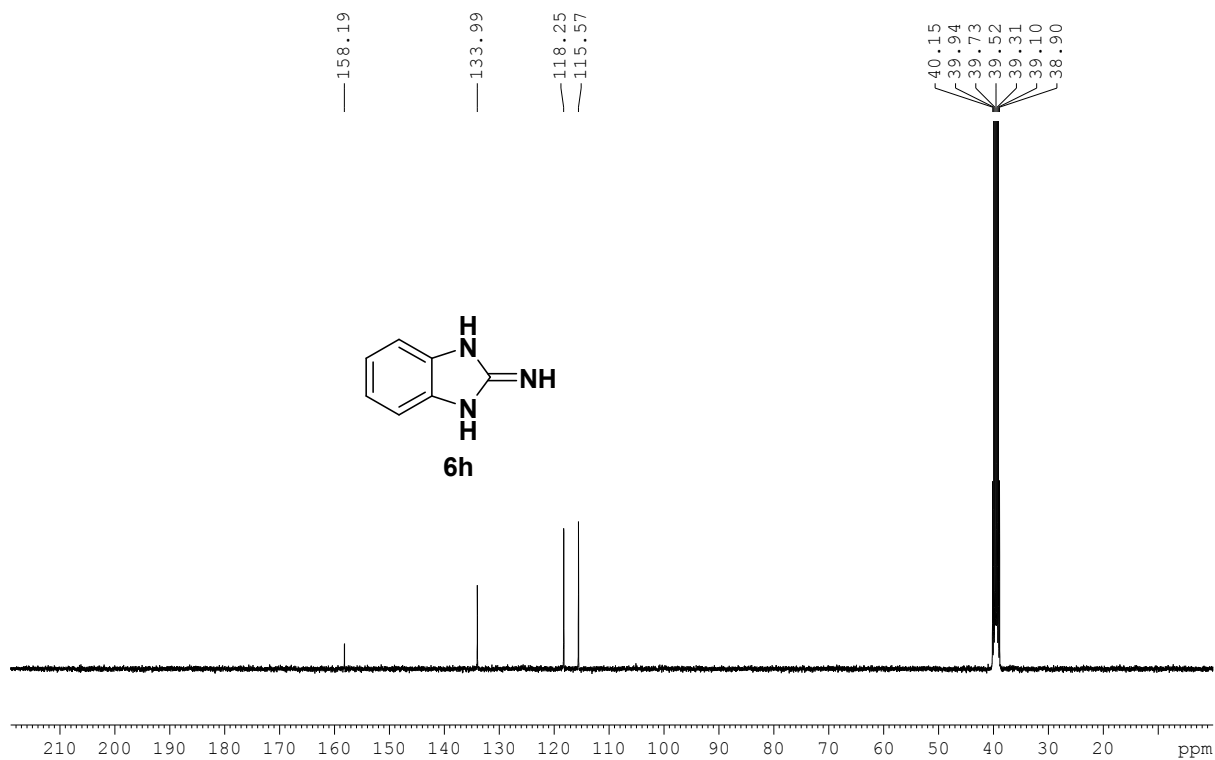

## References

- 1 A. J. Kadhim., *Orient. J. Chem.*, 2018, **34**, 473.
- 2 K. E. Schwiebert, D. N. Chin, J. C. MacDonald and G. M. Whitesides, *J. Am. Chem. Soc.*, 1996, **118**, 4018.
- 3 S. Bruan, *PhD Dissertation*, "New Inhibitors of bacterial hyaluronidase - Synthesis and structure-activity relationships", Regensburg University, **2005**.
- 10 O. V. Dolomanov, L. J. Bourhis, R. J. Gildea, J. A. K. Howard and H. Puschmann, *J. Appl. Cryst.*, 2009, **42**, 339.
- 11 G. M. Sheldrick, *Acta Cryst.*, 2015, **A71**, 3.
- 12 G. M. Sheldrick, *Acta Cryst.*, 2015, **C71**, 3.
- 4 J. P. English, R. C. Clapp, Q. P. Cole, I. F. Halverstadt, J. O. Lampen and J. R. Roblin, *J. Am. Chem. Soc.*, 1945, **67**, 295.
- 5 R. L. Clark and A. A. Pessolano, *J. Am. Chem. Soc.*, 1958, **80**, 1657.
- 6 B. Lakhri, A. Benksim, M. Massoui, E. M. Essassi, V. Lequart, N. Joly, D. Beaupere, A. Wadouachi and P. Martin, *Carbohydr. Res.*, 2008, **343**, 421.
- 7 X. Guida, H. Jianhua and L. Xiaomin, *Eur. J. Med. Chem.*, 2006, **41**, 1080.
- 8 A. Shaabani, A. Maleki, and H. Mofakham, *J. Comb. Chem.*, 2008, **10**, 595.
